# Supplementary material
Source: PubMed Central journal article supplement (PMC4556938)
Supplement: Table_S1.pdf [file Table_S1.pdf]

Supplemental Table: Putative cumulus or granulosa cell biomarkers correlated to oocyte quality and developmental competence

| <b>Gene Symbol</b> | <b>Description</b>                                                                    |
|--------------------|---------------------------------------------------------------------------------------|
| PSMA2              | proteasome (prosome, macropain) subunit, alpha type, 2                                |
| TMEM126A           | transmembrane protein 126A                                                            |
| TMEM126B           | transmembrane protein 126B                                                            |
| PSMA2              | proteasome (prosome, macropain) subunit, alpha type, 2                                |
| PSMA3              | proteasome (prosome, macropain) subunit, alpha type, 3                                |
| LOC100295249       | similar to homeobox C8                                                                |
| PSMA2              | proteasome (prosome, macropain) subunit, alpha type, 2                                |
| ATP5J              | ATP synthase, H <sup>+</sup> transporting, mitochondrial F0 complex, subunit F6       |
| DIAPH3             | diaphanous homolog 3 (Drosophila)                                                     |
| C4H7ORF11          | chromosome 7 open reading frame 11 ortholog                                           |
| COX7C              | cytochrome c oxidase subunit VIIc                                                     |
| VCAN               | versican                                                                              |
| LOC100295268       | hypothetical protein LOC100295268                                                     |
| DBI                | diazepam binding inhibitor (GABA receptor modulator, acyl-Coenzyme A binding protein) |
| PSMA5              | proteasome (prosome, macropain) subunit, alpha type, 5                                |
| WDR89              | WD repeat domain 89                                                                   |
| COP5               | COP9 constitutive photomorphogenic homolog subunit 5 (Arabidopsis)                    |
| RSRC1              | arginine/serine-rich coiled-coil 1                                                    |
| CNO                | cappuccino homolog (mouse)                                                            |
| APCDD1             | adenomatosis polyposis coli down-regulated 1                                          |
| TOMM5              | translocase of outer mitochondrial membrane 5 homolog (yeast)                         |
| PLCB4              | phospholipase C, beta 4                                                               |
| LOC509351          | hypothetical LOC509351                                                                |
| FAM92A1            | family with sequence similarity 92, member A1                                         |
| NOL7               | nucleolar protein 7, 27kDa                                                            |
| PSMD14             | proteasome (prosome, macropain) 26S subunit, non-ATPase, 14                           |
| ACYPI              | acylphosphatase 1, erythrocyte (common) type                                          |
| SEMA6D             | sema domain, transmembrane domain (TM), and cytoplasmic domain, (semaphorin) 6D       |
| DBI                | diazepam binding inhibitor (GABA receptor modulator, acyl-Coenzyme A binding protein) |
| TCEB1              | transcription elongation factor B (SIII), polypeptide 1 (15kDa, elongin C)            |
| LOC100295873       | similar to cytochrome c oxidase, subunit VIIc                                         |
| NOL7               | nucleolar protein 7, 27kDa                                                            |
| NUDCD2             | NudC domain containing 2                                                              |
| GTF3C6             | general transcription factor IIIC, polypeptide 6, alpha 35kDa                         |
| APCDD1             | adenomatosis polyposis coli down-regulated 1                                          |
| LOC100336216       | cytochrome c oxidase, subunit VIIc-like                                               |
| LOC100297413       | similar to cytochrome c oxidase, subunit VIIc                                         |

|              |                                                                                                     |
|--------------|-----------------------------------------------------------------------------------------------------|
| RNASEH2B     | ribonuclease H2, subunit B                                                                          |
| LDLR         | low density lipoprotein receptor                                                                    |
| SRXN1        | sulfiredoxin 1 homolog ( <i>S. cerevisiae</i> )                                                     |
| SCG2         | secretogranin II (chromogranin C)                                                                   |
| CTSS         | cathepsin S                                                                                         |
| VNN1         | vanin 1                                                                                             |
| MXI1         | MAX interactor 1                                                                                    |
| DUSP1        | dual specificity phosphatase 1                                                                      |
| ADORA2B      | adenosine A2b receptor                                                                              |
| SHISA2       | shisa homolog 2 ( <i>Xenopus laevis</i> )                                                           |
| KLF4         | Kruppel-like factor 4 (gut)                                                                         |
| N4BP2L1      | NEDD4 binding protein 2-like 1                                                                      |
| PCBD1        | pterin-4 alpha-carbinolamine dehydratase/dimerization cofactor of hepatocyte nuclear factor 1 alpha |
| BOLA-DQB     | major histocompatibility complex, class II, DQ beta                                                 |
| YTHDF1       | YTH domain family, member 1                                                                         |
| AMY2A        | amylase, alpha 2A (pancreatic)                                                                      |
| TMEM50B      | transmembrane protein 50B                                                                           |
| IER3         | immediate early response 3                                                                          |
| ZFP36L1      | zinc finger protein 36, C3H type-like 1                                                             |
| MYLIP        | myosin regulatory light chain interacting protein                                                   |
| BHLHB2       | basic helix-loop-helix domain containing, class B, 2                                                |
| PLAT         | plasminogen activator, tissue                                                                       |
| LITAF        | lipopolysaccharide-induced TNF factor                                                               |
| ETS2         | v-ets erythroblastosis virus E26 oncogene homolog 2 (avian)                                         |
| SIPA1L2      | signal-induced proliferation-associated 1 like 2                                                    |
| SIPA1L2      | signal-induced proliferation-associated 1 like 2                                                    |
| SYTL2        | synaptotagmin-like 2                                                                                |
| NCKAP5L      | NCK-associated protein 5-like                                                                       |
| HPCAL1       | hippocalcin-like 1                                                                                  |
| COL4A1       | collagen, type IV, alpha 1                                                                          |
| ADAMTS1      | ADAM metallopeptidase with thrombospondin type 1 motif, 1                                           |
| RBM39        | RNA binding motif protein 39                                                                        |
| GOLGA7B      | golgi autoantigen, golgin subfamily a, 7B                                                           |
| DAB2         | disabled homolog 2, mitogen-responsive phosphoprotein ( <i>Drosophila</i> )                         |
| RBM39        | RNA binding motif protein 39                                                                        |
| LOC100295764 | similar to WD repeat and SOCS box-containing 1                                                      |
| ARHGEF3      | Rho guanine nucleotide exchange factor (GEF) 3                                                      |
| FOS          | FBJ murine osteosarcoma viral oncogene homolog                                                      |
| ELL2         | elongation factor, RNA polymerase II, 2                                                             |
| TLE1         | transducin-like enhancer of split 1 (E(sp1) homolog, <i>Drosophila</i> )                            |
| C27H8orf4    | chromosome 8 open reading frame 4 ortholog                                                          |
| GRASP        | GRP1 (general receptor for phosphoinositides 1)-associated scaffold protein                         |
| EGR1         | early growth response 1                                                                             |

|         |                                                                                                |
|---------|------------------------------------------------------------------------------------------------|
| HERPUD1 | homocysteine-inducible, endoplasmic reticulum stress-inducible, ubiquitin-like domain member 1 |
|---------|------------------------------------------------------------------------------------------------|
