# Supplementary material
Source: PubMed Central journal article supplement (PMC4556938)
Supplement: Table_S2.pdf [file Table_S2.pdf]

**Supplementary Table 2. Genes differentially downregulated in carvedilol-treated mouse hearts.**

| Seqname             | GeneSymbol    | Microarray  | Real-time PCR |
|---------------------|---------------|-------------|---------------|
|                     |               | (Carv/DMSO) | Fold Change   |
| NM_001098230        | Pdp1          | 0.50        | UT            |
| NM_177580           | Baiap2l2      | 0.50        | UT            |
| NM_001033369        | Acvr1c        | 0.50        | UT            |
| NM_172378           | BC026439      | 0.50        | UT            |
| <b>NM_001159319</b> | <b>Cacnb1</b> | <b>0.50</b> | <b>0.65*</b>  |
| NM_010254           | Galr2         | 0.51        | UT            |
| NM_001172107        | Gramd1c       | 0.51        | UT            |
| NM_028667           | D3Ert751e     | 0.52        | UT            |
| NM_001168404        | Ankrd55       | 0.52        | UT            |
| NM_001199785        | Zfp839        | 0.52        | UT            |
| NM_177823           | Ubash3a       | 0.52        | UT            |
| NM_212436           | Olf301        | 0.52        | UT            |
| NM_181750           | R3hdm1        | 0.53        | UT            |
| NM_053079           | Slc15a1       | 0.53        | UT            |
| NM_001167996        | 1110032F04Rik | 0.53        | UT            |
| NM_007418           | Adra2c        | 0.53        | UT            |
| NM_010774           | Mbd4          | 0.53        | UT            |
| NM_001005370        | Spin2         | 0.53        | UT            |
| NM_183262           | Stk35         | 0.53        | UT            |
| NM_009301           | Svs5          | 0.53        | UT            |
| NM_001008798        | Whrn          | 0.54        | UT            |
| NM_001161539        | Islr2         | 0.54        | UT            |
| NM_013905           | Hey1          | 0.54        | UT            |
| NM_023709           | Capn9         | 0.55        | UT            |
| NM_008171           | Grin2b        | 0.55        | UT            |
| NM_001039243        | Gm7092        | 0.55        | UT            |
| NM_026253           | Lrrc18        | 0.55        | UT            |
| NM_028889           | Efhd1         | 0.55        | UT            |
| NM_146162           | Tmem119       | 0.55        | UT            |
| NM_001111027        | Runx1t1       | 0.55        | 1.03          |
| NM_172961           | Abat          | 0.55        | UT            |
| NM_027548           | Serpib7       | 0.55        | UT            |
| NM_001037878        | Tcf25         | 0.55        | UT            |
| NM_001001496        | Gja6          | 0.56        | UT            |
| NM_028176           | Cda           | 0.56        | UT            |
| NM_025673           | Golph3        | 0.56        | 0.89          |

|              |               |      |        |
|--------------|---------------|------|--------|
| NM_030137    | Cstad         | 0.56 | UT     |
| NM_001115009 | Synrg         | 0.56 | UT     |
| NM_001081441 | Wdr86         | 0.56 | UT     |
| NM_080637    | Nme5          | 0.56 | UT     |
| NM_029628    | Ppp1r3g       | 0.56 | UT     |
| NM_177625    | Ttc5          | 0.57 | UT     |
| NM_018763    | Chst2         | 0.57 | 0.1*** |
| NM_199148    | BC051665      | 0.57 | UT     |
| NM_001164169 | Pias2         | 0.57 | UT     |
| NM_001109764 | Ctnna2        | 0.57 | UD     |
| NM_026252    | Cpeb4         | 0.57 | UT     |
| NM_001029985 | Kcp           | 0.57 | UT     |
| NM_001134465 | Fam116a       | 0.57 | UT     |
| NM_025807    | Slc16a9       | 0.57 | UT     |
| NM_001163581 | Prom1         | 0.58 | UT     |
| NM_153382    | Lats2         | 0.58 | UT     |
| NM_001014390 | Dyrk2         | 0.58 | UT     |
| NM_173391    | Tph2          | 0.58 | UT     |
| NM_007511    | Atp7b         | 0.58 | UT     |
| NM_001101431 | 2510049J12Rik | 0.58 | UT     |
| NM_007705    | Cirbp         | 0.59 | UT     |
| NM_172588    | Serinc5       | 0.59 | UT     |
| NM_001034059 | Ccdc160       | 0.59 | UT     |
| NM_177348    | Ifne          | 0.59 | UT     |
| NM_008245    | Hhex          | 0.60 | UT     |
| NM_001162926 | Fam84b        | 0.60 | UT     |
| NM_010921    | Nkx3-1        | 0.60 | UT     |
| NM_001168578 | Tceal8        | 0.60 | UT     |
| NM_023143    | C1ra          | 0.60 | UT     |
| NM_053144    | Pcdhb19       | 0.60 | UT     |
| NM_016905    | Galk1         | 0.60 | 1.02   |
| NM_028331    | C1qtnf6       | 0.61 | UT     |
| NM_177391    | Fam109b       | 0.61 | UT     |
| NM_177186    | Slc35e2       | 0.61 | UT     |
| NM_145395    | Duoxa1        | 0.61 | UT     |
| NM_178218    | Hist3h2a      | 0.61 | UT     |
| NM_198647    | Tbc1d22b      | 0.61 | UT     |
| NM_144520    | Sec14l2       | 0.61 | UT     |
| NM_177394    | A730011L01Rik | 0.61 | UT     |
| NM_194060    | Foxo6         | 0.61 | UT     |
| NM_009661    | Alox8         | 0.62 | UT     |

|              |          |      |      |
|--------------|----------|------|------|
| NM_008269    | Hoxb6    | 0.62 | UT   |
| NM_027721    | Katnal2  | 0.62 | UT   |
| NM_183088    | Scand3   | 0.62 | UT   |
| NM_176838    | Esrp2    | 0.62 | UT   |
| NM_133853    | Magi3    | 0.62 | UT   |
| NM_177748    | Kir3dl2  | 0.62 | UT   |
| NM_145379    | Mrgprf   | 0.62 | UT   |
| NM_023898    | Pde6h    | 0.62 | UT   |
| NM_181490    | Cldn17   | 0.62 | UT   |
| NM_152814    | Zfp566   | 0.62 | UT   |
| NM_025739    | Rnf220   | 0.63 | UT   |
| NM_015799    | Trfr2    | 0.63 | UT   |
| NM_001110337 | Gprc5c   | 0.63 | UT   |
| NM_207668    | Acpp     | 0.63 | UT   |
| NM_001012324 | Ecm2     | 0.63 | UT   |
| NM_027026    | Lrrc46   | 0.63 | UT   |
| NM_001005424 | Gm996    | 0.63 | UT   |
| NM_001164523 | Omt2a    | 0.63 | UT   |
| NM_172264    | Chdh     | 0.63 | UT   |
| NM_145124    | Mib2     | 0.63 | UT   |
| NM_172565    | Klhl11   | 0.63 | UT   |
| NM_009189    | Six1     | 0.63 | UT   |
| NM_001159354 | Magi3    | 0.63 | UT   |
| NM_054042    | Cd248    | 0.63 | UT   |
| NM_001007578 | Armcx6   | 0.64 | UT   |
| NM_001083118 | Terf2    | 0.64 | UT   |
| NM_027046    | Ccdc54   | 0.64 | UT   |
| NM_027195    | Casz1    | 0.64 | UT   |
| NM_001145390 | Gm766    | 0.64 | UT   |
| NM_001177600 | Adam23   | 0.64 | UT   |
| NM_001083894 | Liph     | 0.64 | UT   |
| NM_027120    | Itgb1bp3 | 0.64 | UT   |
| NM_024290    | Tnfrsf23 | 0.65 | UT   |
| NM_033264    | Arpp21   | 0.65 | UT   |
| NM_001081060 | Slc9a3   | 0.65 | 0.82 |
| NM_001191004 | Lsm6     | 0.65 | UT   |
| NM_026075    | Srek1ip1 | 0.65 | UT   |
| NM_134028    | Tubg2    | 0.65 | UT   |
| NM_001033158 | Rasl12   | 0.65 | UT   |
| NM_001141983 | Golga7b  | 0.65 | UT   |
| NM_001163144 | Pcsk5    | 0.65 | UT   |

|              |               |      |      |
|--------------|---------------|------|------|
| NM_008538    | Marcks        | 0.65 | UT   |
| NM_178879    | B3gnt9-ps     | 0.65 | UT   |
| NM_153049    | Mkl1          | 0.65 | UT   |
| NM_010690    | Lats1         | 0.65 | UT   |
| NM_023850    | Chst1         | 0.65 | UT   |
| NM_177049    | Jph4          | 0.65 | UT   |
| NM_017377    | B4galt2       | 0.65 | 0.79 |
| NM_175331    | Nt5dc3        | 0.65 | UT   |
| NM_199200    | Fam171a2      | 0.65 | UT   |
| NM_025285    | Stmn2         | 0.65 | UT   |
| NM_027061    | Zpbp2         | 0.66 | UT   |
| NM_018862    | Agpat1        | 0.66 | UT   |
| NM_173027    | Ip6k3         | 0.66 | UT   |
| NM_175525    | D630042P16Rik | 0.66 | UT   |
| NM_027622    | Tex19.2       | 0.66 | UT   |
| NM_001166537 | Hmga1         | 0.66 | UT   |
| NM_175546    | Wdfy2         | 0.66 | UT   |
| NM_001166250 | Mgll          | 0.66 | UT   |
| NM_009056    | Rfx2          | 0.66 | UT   |
| NM_007453    | Prdx6         | 0.66 | UT   |
| NM_145399    | Scgn          | 0.66 | UT   |
| NM_009751    | Bfsp1         | 0.66 | UT   |
| NM_001198971 | BC049352      | 0.66 | UT   |
| NM_013796    | Nagpa         | 0.66 | UT   |
| NM_028426    | 3110007F17Rik | 0.66 | UT   |
| NM_198160    | Smarcc2       | 0.67 | UT   |
| NM_177632    | Fam43a        | 0.67 | UT   |

The expression of eight indicated genes, which were identified by microarray analysis (Figure 1) and categorized into pathways involved in transcriptional misregulation [runx1t1 and golph3], galactose metabolism [galk1], mineral absorption [slc9a3], glycosaminoglycan biosynthesis-keratan sulfate [chst2 and b4galt2], or arrhythmogenic right ventricular cardiomyopathy [cacnb1 and cttna2] (Figure 6B), was verified by using real-time RT-PCR analysis. Fold change values represent mean of expression levels from three (microarray) or six (real-time PCR) independent mice per group. Red color means that those genes are significantly downregulated by carvedilol (Carv) compared

to vehicle control (DMSO) in both microarray and real-time PCR analyses. UD: undetectable; UT: untested. \*,  $P < 0.05$  vs. DMSO; . \*\*\*,  $P < 0.001$  vs. DMSO.
