# Supplementary material
Source: PubMed Central journal article supplement (PMC4556938)
Supplement: Table_S3.pdf [file Table_S3.pdf]

**Supplementary Table 3. Cellular component analysis of differentially upregulated genes.**

| GO.ID      | Term                                                     | Ontology           | Count | Pop.Hits | List.Total | Pop.Total | Fold.Enrichment  | Pvalue              | FDR | Enrichment.Score | GENES                                                                                                                                                                                                                                                                                                                                                                                                                                                                                                                                                                                                                                                                                                                                                                  |
|------------|----------------------------------------------------------|--------------------|-------|----------|------------|-----------|------------------|---------------------|-----|------------------|------------------------------------------------------------------------------------------------------------------------------------------------------------------------------------------------------------------------------------------------------------------------------------------------------------------------------------------------------------------------------------------------------------------------------------------------------------------------------------------------------------------------------------------------------------------------------------------------------------------------------------------------------------------------------------------------------------------------------------------------------------------------|
| GO:0005667 | <a href="#">transcription factor complex</a>             | Cellular component | 5     | 323      | 77         | 23539     | 4.73221824615013 | 0.00416185691202761 | 1   | 2.38071285525968 | <a href="#">LMO2//PBX3</a><br><a href="#">/POU2F1//RBL2</a><br><a href="#">/FOXK2</a>                                                                                                                                                                                                                                                                                                                                                                                                                                                                                                                                                                                                                                                                                  |
| GO:0044451 | <a href="#">nucleoplasm part</a>                         | Cellular component | 7     | 707      | 77         | 23539     | 3.02674553169603 | 0.00836399277002481 | 1   | 2.07758635126561 | <a href="#">LMO2//PBX3</a><br><a href="#">/POU2F1//RBL2</a><br><a href="#">/FOXK2//THAP7</a><br><a href="#">/CDK13</a>                                                                                                                                                                                                                                                                                                                                                                                                                                                                                                                                                                                                                                                 |
| GO:0001725 | <a href="#">stress fiber</a>                             | Cellular component | 2     | 52       | 77         | 23539     | 11.7577422577423 | 0.0126002846205685  | 1   | 1.89961964474385 | <a href="#">ACTN4//MYH7</a>                                                                                                                                                                                                                                                                                                                                                                                                                                                                                                                                                                                                                                                                                                                                            |
| GO:0032432 | <a href="#">actin filament bundle</a>                    | Cellular component | 2     | 55       | 77         | 23539     | 11.1164108618654 | 0.0140225267452969  | 1   | 1.85317372298371 | <a href="#">ACTN4//MYH7</a>                                                                                                                                                                                                                                                                                                                                                                                                                                                                                                                                                                                                                                                                                                                                            |
| GO:0005654 | <a href="#">nucleoplasm</a>                              | Cellular component | 7     | 797      | 77         | 23539     | 2.68495494467891 | 0.0153947746897201  | 1   | 1.81262666283271 | <a href="#">LMO2//PBX3</a><br><a href="#">/POU2F1//RBL2</a><br><a href="#">/FOXK2//THAP7</a><br><a href="#">/CDK13</a>                                                                                                                                                                                                                                                                                                                                                                                                                                                                                                                                                                                                                                                 |
| GO:0043231 | <a href="#">intracellular membrane-bounded organelle</a> | Cellular component | 37    | 8360     | 77         | 23539     | 1.3529842167402  | 0.0157508732949841  | 1   | 1.80269536208528 | <a href="#">HPD//SYCP2</a><br><a href="#">/ENBP1</a><br><a href="#">/2010106G01RIK</a><br><a href="#">/EPDR1</a><br><a href="#">/TBC1D15</a><br><a href="#">/RAB32//SEFN3</a><br><a href="#">/HK3//LETM2</a><br><a href="#">/PLD3//SMPD4</a><br><a href="#">/LMO2//MEIS2</a><br><a href="#">/PBX3//POU2F1</a><br><a href="#">/PPARA//PRM2</a><br><a href="#">/RBL2//YBX2</a><br><a href="#">/RCAN1</a><br><a href="#">/ZFP318</a><br><a href="#">/ACTN4</a><br><a href="#">/UBE2W//PUS3</a><br><a href="#">/UPF3B//FOXK2</a><br><a href="#">/THAP7//CDK13</a><br><a href="#">/ATOH8</a><br><a href="#">/2310003H01RIK</a><br><a href="#">/NCK1PSD</a><br><a href="#">/MYH7//PAPD7</a><br><a href="#">/RASGRP4</a><br><a href="#">/STEAP3</a><br><a href="#">/HOOK3</a> |
| GO:0016607 | <a href="#">nuclear speck</a>                            | Cellular component | 2     | 59       | 77         | 23539     | 10.3627558881796 | 0.0160215165542488  | 1   | 1.79529637714263 | <a href="#">THAP7//CDK13</a>                                                                                                                                                                                                                                                                                                                                                                                                                                                                                                                                                                                                                                                                                                                                           |
| GO:0043227 | <a href="#">membrane-bounded organelle</a>               | Cellular component | 37    | 8380     | 77         | 23539     | 1.34975513746397 | 0.0163920039201763  | 1   | 1.78536795074457 | <a href="#">HPD//SYCP2</a><br><a href="#">/ENBP1</a><br><a href="#">/2010106G01RIK</a><br><a href="#">/EPDR1</a><br><a href="#">/TBC1D15</a><br><a href="#">/RAB32//SEFN3</a><br><a href="#">/HK3//LETM2</a><br><a href="#">/PLD3//SMPD4</a><br><a href="#">/LMO2//MEIS2</a><br><a href="#">/PBX3//POU2F1</a><br><a href="#">/PPARA//PRM2</a><br><a href="#">/RBL2//YBX2</a><br><a href="#">/RCAN1</a><br><a href="#">/ZFP318</a><br><a href="#">/ACTN4</a><br><a href="#">/UBE2W//PUS3</a><br><a href="#">/UPF3B//FOXK2</a><br><a href="#">/THAP7//CDK13</a><br><a href="#">/ATOH8</a><br><a href="#">/2310003H01RIK</a><br><a href="#">/NCK1PSD</a><br><a href="#">/MYH7//PAPD7</a><br><a href="#">/RASGRP4</a><br><a href="#">/STEAP3</a><br><a href="#">/HOOK3</a> |
| GO:0042641 | <a href="#">actomyosin</a>                               | Cellular component | 2     | 61       | 77         | 23539     | 10.0229934000426 | 0.0170640825536399  | 1   | 1.76791705649771 | <a href="#">ACTN4//MYH7</a>                                                                                                                                                                                                                                                                                                                                                                                                                                                                                                                                                                                                                                                                                                                                            |
| GO:0043226 | <a href="#">organelle</a>                                | Cellular component | 40    | 9472     | 77         | 23539     | 1.29096832221832 | 0.0246018359422688  | 1   | 1.60903248192733 | <a href="#">HPD//HOOK3</a><br><a href="#">/RBL2//PRM2</a><br><a href="#">/SYCP2//ACTN4</a><br><a href="#">/MYH7</a><br><a href="#">/SH3PXD2B</a><br><a href="#">/ENBP1</a><br><a href="#">/2010106G01RIK</a><br><a href="#">/EPDR1</a><br><a href="#">/TBC1D15</a><br><a href="#">/RAB32//SEFN3</a><br><a href="#">/HK3//LETM2</a><br><a href="#">/PLD3//SMPD4</a><br><a href="#">/LMO2//MEIS2</a><br><a href="#">/PBX3//POU2F1</a><br><a href="#">/PPARA//YBX2</a><br><a href="#">/RCAN1</a><br><a href="#">/ZFP318</a><br><a href="#">/UBE2W//PUS3</a><br><a href="#">/UPF3B//FOXK2</a><br><a href="#">/THAP7//CDK13</a><br><a href="#">/ATOH8</a><br><a href="#">/2310003H01RIK</a>                                                                                 |
