# Supplementary material
Source: PubMed Central journal article supplement (PMC4556938)
Supplement: Table_S4.pdf [file Table_S4.pdf]

**Supplementary Table 4. Cellular component analysis of differentially downregulated genes.**

| GO.ID      | Term                            | Ontology           | Count | Pop.Hits | List.Total | Pop.Total | Fold.Enrichment  | Pvalue              | FDR              | Enrichment.Score | GENES                                                                                                                                                                                                                                                                                                                                                                                                                                                                                                                                                                                                                                                                                                                                                                                                                                                                                                                                                                                                                                                                                                                                                                                                                                                                                                                                                                                                                                                                                                                                                                                                                                                                                                                                                                                                                                                                                                                                                                                                                                                                                                                                                                                                                                                                                                                                                                                                                                                                                                                                                                                                                                                                                                                                                                                                                                                                                                                                                                                                    |
|------------|---------------------------------|--------------------|-------|----------|------------|-----------|------------------|---------------------|------------------|------------------|----------------------------------------------------------------------------------------------------------------------------------------------------------------------------------------------------------------------------------------------------------------------------------------------------------------------------------------------------------------------------------------------------------------------------------------------------------------------------------------------------------------------------------------------------------------------------------------------------------------------------------------------------------------------------------------------------------------------------------------------------------------------------------------------------------------------------------------------------------------------------------------------------------------------------------------------------------------------------------------------------------------------------------------------------------------------------------------------------------------------------------------------------------------------------------------------------------------------------------------------------------------------------------------------------------------------------------------------------------------------------------------------------------------------------------------------------------------------------------------------------------------------------------------------------------------------------------------------------------------------------------------------------------------------------------------------------------------------------------------------------------------------------------------------------------------------------------------------------------------------------------------------------------------------------------------------------------------------------------------------------------------------------------------------------------------------------------------------------------------------------------------------------------------------------------------------------------------------------------------------------------------------------------------------------------------------------------------------------------------------------------------------------------------------------------------------------------------------------------------------------------------------------------------------------------------------------------------------------------------------------------------------------------------------------------------------------------------------------------------------------------------------------------------------------------------------------------------------------------------------------------------------------------------------------------------------------------------------------------------------------------|
| GO:0005794 | <a href="#">Golgi apparatus</a> | Cellular component | 16    | 994      | 171        | 23539     | 2.21577417722711 | 0.00247955583420123 | 0.58448928088464 | 2.60562610789617 | <a href="#">CHST2</a> / <a href="#">CHST1</a><br><a href="#">/ATP7B</a> / <a href="#">GOLPH3</a><br><a href="#">/FAM109B</a><br><a href="#">/SYNRG</a> / <a href="#">ACPP</a><br><a href="#">/PCSK5</a> / <a href="#">STMN2</a><br><a href="#">/TRFR2</a> / <a href="#">NAGPA</a><br><a href="#">/B4GALT2</a><br><a href="#">/GOLGA7B</a><br><a href="#">/EMID2</a> / <a href="#">SERINC5</a><br><a href="#">/CLDN17</a>                                                                                                                                                                                                                                                                                                                                                                                                                                                                                                                                                                                                                                                                                                                                                                                                                                                                                                                                                                                                                                                                                                                                                                                                                                                                                                                                                                                                                                                                                                                                                                                                                                                                                                                                                                                                                                                                                                                                                                                                                                                                                                                                                                                                                                                                                                                                                                                                                                                                                                                                                                                 |
| GO:0044644 | <a href="#">cell part</a>       | Cellular component | 113   | 13142    | 171        | 23539     | 1.18361069060314 | 0.00393069886214797 | 0.58448928088464 | 2.40553022698048 | <a href="#">ADORA3</a> / <a href="#">ADRA2C</a><br><a href="#">/ATP7B</a> / <a href="#">BFS1P</a><br><a href="#">/CACNB1</a><br><a href="#">/CTNNA2</a> / <a href="#">GALR2</a><br><a href="#">/GRIN2B</a> / <a href="#">HEPH</a><br><a href="#">/PROM1</a> / <a href="#">ADAM23</a><br><a href="#">/TRFR2</a> / <a href="#">ACPP</a><br><a href="#">/CD200R1</a> / <a href="#">LIMA1</a><br><a href="#">/GOLPH3</a><br><a href="#">/SLC16A9</a><br><a href="#">/GPRC5C</a> / <a href="#">CD248</a><br><a href="#">/TNFRSF23</a><br><a href="#">/PCDH19</a> / <a href="#">MAGI3</a><br><a href="#">/CHRNB4</a> / <a href="#">ANK2</a><br><a href="#">/BAIAP2L2</a><br><a href="#">/MRGPRE</a> / <a href="#">LIPH</a><br><a href="#">/CLDN17</a><br><a href="#">/ACVR1C</a> / <a href="#">IPH4</a><br><a href="#">/ISLR2</a> / <a href="#">FAM84B</a><br><a href="#">/GJA6</a> / <a href="#">CHST2</a><br><a href="#">/CHST1</a> / <a href="#">DYRK2</a><br><a href="#">/MIB2</a> / <a href="#">TUBG2</a><br><a href="#">/ALOX8</a> / <a href="#">LATS1</a><br><a href="#">/MBD4</a> / <a href="#">NKX3-1</a><br><a href="#">/ZBTB17</a> / <a href="#">ZFP2</a><br><a href="#">/ZFP62</a> / <a href="#">LATS2</a><br><a href="#">/SFC14L2</a><br><a href="#">/SMARCC2</a><br><a href="#">/TTGB1BP3</a><br><a href="#">/CASZ1</a> / <a href="#">RASL12</a><br><a href="#">/ZFP618</a> / <a href="#">CAPN9</a><br><a href="#">/TRFR2</a><br><a href="#">/HIST4H2A</a><br><a href="#">/ZNRP3</a> / <a href="#">VHRN1</a><br><a href="#">/LSM6</a> / <a href="#">PRDX6</a><br><a href="#">/TCE25</a> / <a href="#">CSTAD</a><br><a href="#">/EFHD1</a> / <a href="#">NTSDC3</a><br><a href="#">/CHDH</a> / <a href="#">ABAT</a><br><a href="#">/PDP1</a> / <a href="#">OMT2A</a><br><a href="#">/CDA</a> / <a href="#">UBASH3A</a><br><a href="#">/FOXO6</a> / <a href="#">EMID2</a><br><a href="#">/SERINC5</a><br><a href="#">/SLC15A1</a><br><a href="#">/RUNX1T1</a> / <a href="#">CIRBP</a><br><a href="#">/HHEX</a> / <a href="#">HMGAI1</a><br><a href="#">/HOXB6</a> / <a href="#">PIAS2</a><br><a href="#">/PITX1</a> / <a href="#">REF2</a><br><a href="#">/SIX1</a> / <a href="#">HEYL</a><br><a href="#">/TCEAL8</a> / <a href="#">SITK35</a><br><a href="#">/TEX19.2</a> / <a href="#">PRSS23</a><br><a href="#">/ESRP2</a> / <a href="#">ITC5</a><br><a href="#">/MKL1</a> / <a href="#">IP6K3</a><br><a href="#">/TCEAL5</a> / <a href="#">GALK1</a><br><a href="#">/KIF9</a> / <a href="#">MARCKS</a><br><a href="#">/STMN2</a> / <a href="#">RNF220</a><br><a href="#">/RRC15</a><br><a href="#">/KATNAL2</a><br><a href="#">/ARPP21</a><br><a href="#">/SERPINB7</a> / <a href="#">SCGN</a><br><a href="#">/SYNRG</a><br><a href="#">/FAM109B</a><br><a href="#">/DUOXA1</a> / <a href="#">PCSK5</a><br><a href="#">/NAGPA</a><br><a href="#">/B4GALT2</a><br><a href="#">/GOLGA7B</a><br><a href="#">/SLC9A3</a> / <a href="#">ENKUR</a><br><a href="#">/KLRCL1</a> / <a href="#">TPH2</a> |
| GO:0005623 | <a href="#">cell</a>            | Cellular component | 113   | 13163    | 171        | 23539     | 1.18172238060521 | 0.00421155976337743 | 0.58448928088464 | 2.37555703215139 | <a href="#">ADORA3</a> / <a href="#">ADRA2C</a><br><a href="#">/ATP7B</a> / <a href="#">BFS1P</a><br><a href="#">/CACNB1</a><br><a href="#">/CTNNA2</a> / <a href="#">GALR2</a><br><a href="#">/GRIN2B</a> / <a href="#">HEPH</a><br><a href="#">/PROM1</a> / <a href="#">ADAM23</a><br><a href="#">/TRFR2</a> / <a href="#">ACPP</a><br><a href="#">/CD200R1</a> / <a href="#">LIMA1</a><br><a href="#">/GOLPH3</a><br><a href="#">/SLC16A9</a><br><a href="#">/GPRC5C</a> / <a href="#">CD248</a><br><a href="#">/TNFRSF23</a><br><a href="#">/PCDH19</a> / <a href="#">MAGI3</a><br><a href="#">/CHRNB4</a> / <a href="#">ANK2</a><br><a href="#">/BAIAP2L2</a><br><a href="#">/MRGPRE</a> / <a href="#">LIPH</a><br><a href="#">/CLDN17</a><br><a href="#">/ACVR1C</a> / <a href="#">IPH4</a><br><a href="#">/ISLR2</a> / <a href="#">FAM84B</a><br><a href="#">/GJA6</a> / <a href="#">CHST2</a><br><a href="#">/CHST1</a> / <a href="#">DYRK2</a><br><a href="#">/MIB2</a> / <a href="#">TUBG2</a><br><a href="#">/ALOX8</a> / <a href="#">LATS1</a><br><a href="#">/MBD4</a> / <a href="#">NKX3-1</a><br><a href="#">/ZBTB17</a> / <a href="#">ZFP2</a><br><a href="#">/ZFP62</a> / <a href="#">LATS2</a><br><a href="#">/SFC14L2</a><br><a href="#">/SMARCC2</a><br><a href="#">/TTGB1BP3</a>                                                                                                                                                                                                                                                                                                                                                                                                                                                                                                                                                                                                                                                                                                                                                                                                                                                                                                                                                                                                                                                                                                                                                                                                                                                                                                                                                                                                                                                                                                                                                                                                                                                                                                    |



|            |                                      |                    |    |      |     |       |                  |                    |                   |                  |                                                                                                                                                                                                                                                                                                                                                                                                                                                                                                                                                                                                                                                                                                                                                                                                                                                                                                                                                                                                                                                                                                                                                                                                                                                                                                                                                                                                                                                                                                                                            |
|------------|--------------------------------------|--------------------|----|------|-----|-------|------------------|--------------------|-------------------|------------------|--------------------------------------------------------------------------------------------------------------------------------------------------------------------------------------------------------------------------------------------------------------------------------------------------------------------------------------------------------------------------------------------------------------------------------------------------------------------------------------------------------------------------------------------------------------------------------------------------------------------------------------------------------------------------------------------------------------------------------------------------------------------------------------------------------------------------------------------------------------------------------------------------------------------------------------------------------------------------------------------------------------------------------------------------------------------------------------------------------------------------------------------------------------------------------------------------------------------------------------------------------------------------------------------------------------------------------------------------------------------------------------------------------------------------------------------------------------------------------------------------------------------------------------------|
|            |                                      |                    |    |      |     |       |                  |                    |                   |                  | <a href="#">//GPRC5C/CSTAD</a><br><a href="#">//EHD1//NTSDC3</a><br><a href="#">//CHDH//ABAT</a><br><a href="#">//PDP1//OMT2A</a><br><a href="#">//SEC14L2</a><br><a href="#">//CDA//UBASH3A</a><br><a href="#">//FOXO6//EMID2</a><br><a href="#">//SERINC5//IPH4</a><br><a href="#">//RUNX1T1//CIRBP</a><br><a href="#">//HHEX//HMGAI</a><br><a href="#">//HOXB6//PIAS2</a><br><a href="#">//NKX3-1//PTX1</a><br><a href="#">//RFX2//SK1</a><br><a href="#">//ZBTB17//ZFP2</a><br><a href="#">//ZFP62//HEYL</a><br><a href="#">//ICEAL8//STK35</a><br><a href="#">//SMARCC2</a><br><a href="#">//CASZ1//TEX19.2</a><br><a href="#">//ZFP618//PRSS23</a><br><a href="#">//ESRP2//MAGI3</a><br><a href="#">//TTC5//MKL1</a><br><a href="#">//IP6K3//ICEAL5</a><br><a href="#">//ADRA2C//ALOX8</a><br><a href="#">//CTNNA2//GALK1</a><br><a href="#">//KIF9//MARCKS</a><br><a href="#">//STMN2//TRFR2</a><br><a href="#">//RNF220//LRRC18</a><br><a href="#">//CD248//KATNAL2</a><br><a href="#">//CAPN9//WHRN</a><br><a href="#">//ARPP21//ANK2</a><br><a href="#">//SERPINB7//SCGN</a><br><a href="#">//SYNRG//ACVR1C</a><br><a href="#">//FAM84B</a><br><a href="#">//FAM109B//ATP7B</a><br><a href="#">//DUXA1//PCSK5</a><br><a href="#">//NAGPA</a><br><a href="#">//B4GALT2</a><br><a href="#">//GOLGA7B</a><br><a href="#">//CLDN17//GRIN2B</a><br><a href="#">//CACNB1//ENKUR</a><br><a href="#">//BAIAP2L2</a><br><a href="#">//PROM1//HEPH</a><br><a href="#">//GALR2</a><br><a href="#">//TGB1BP3</a><br><a href="#">//RASL12</a> |
| GO:0043073 | <a href="#">germ cell nucleus</a>    | Cellular component | 2  | 23   | 171 | 23539 | 11.9699974574116 | 0.0120087660242805 | 0.620220833711134 | 1.92050161677518 | <a href="#">//TERF2//MARCKS</a>                                                                                                                                                                                                                                                                                                                                                                                                                                                                                                                                                                                                                                                                                                                                                                                                                                                                                                                                                                                                                                                                                                                                                                                                                                                                                                                                                                                                                                                                                                            |
| GO:0032421 | <a href="#">stereocilium bundle</a>  | Cellular component | 2  | 24   | 171 | 23539 | 11.4712475633528 | 0.0130385213856323 | 0.620220833711134 | 1.88477165633958 | <a href="#">//PROM1//WHRN</a>                                                                                                                                                                                                                                                                                                                                                                                                                                                                                                                                                                                                                                                                                                                                                                                                                                                                                                                                                                                                                                                                                                                                                                                                                                                                                                                                                                                                                                                                                                              |
| GO:0005911 | <a href="#">cell-cell junction</a>   | Cellular component | 6  | 267  | 171 | 23539 | 3.09337012944346 | 0.0135576227035841 | 0.620220833711134 | 1.86781645628227 | <a href="#">//CTNNA2//GIA6</a><br><a href="#">//ATP7B//MAGI3</a><br><a href="#">//CLDN17</a><br><a href="#">//BAIAP2L2</a>                                                                                                                                                                                                                                                                                                                                                                                                                                                                                                                                                                                                                                                                                                                                                                                                                                                                                                                                                                                                                                                                                                                                                                                                                                                                                                                                                                                                                 |
| GO:0005737 | <a href="#">cytoplasm</a>            | Cellular component | 74 | 8219 | 171 | 23539 | 1.23938043998751 | 0.0140959280388894 | 0.620220833711134 | 1.85090632604277 | <a href="#">//CHST2//CHST1</a><br><a href="#">//TUBG2//ZBP2</a><br><a href="#">//PRDX6//ACPP</a><br><a href="#">//BFS1//GOLPH3</a><br><a href="#">//TGF2//GPRC5C</a><br><a href="#">//CSTAD//EHD1</a><br><a href="#">//NTSDC3//CHDH</a><br><a href="#">//ABAT//PDP1</a><br><a href="#">//OMT2A//SEC14L2</a><br><a href="#">//CDA//UBASH3A</a><br><a href="#">//FOXO6//EMID2</a><br><a href="#">//SERINC5//IPH4</a><br><a href="#">//STMN2//MIB2</a><br><a href="#">//FAM109B//ATP7B</a><br><a href="#">//DUXA1//PCSK5</a><br><a href="#">//TERF2//NAGPA</a><br><a href="#">//B4GALT2</a><br><a href="#">//GOLGA7B</a><br><a href="#">//SYNRG//CLDN17</a><br><a href="#">//MARCKS</a><br><a href="#">//GRIN2B//CIRBP</a><br><a href="#">//CACNB1</a><br><a href="#">//BAIAP2L2//SCGN</a><br><a href="#">//HEPH//ADRA2C</a><br><a href="#">//ALOX8//CTNNA2</a><br><a href="#">//GALK1//HHEX</a><br><a href="#">//KIF9//LATS1</a><br><a href="#">//MBD4//PTX1</a><br><a href="#">//LATS2//TRFR2</a><br><a href="#">//HEYL//LIMA1</a><br><a href="#">//RNF220//STK35</a><br><a href="#">//LRRC18//DYRK2</a><br><a href="#">//CASZ1//CD248</a><br><a href="#">//KATNAL2</a><br><a href="#">//CAPN9//WHRN</a><br><a href="#">//ARPP21//LSM6</a><br><a href="#">//ANK2//SERPINB7</a><br><a href="#">//TTC5//MKL1</a><br><a href="#">//ACVR1C//IP6K3</a><br><a href="#">//FAM84B</a>                                                                                                                                                               |
| GO:0005576 | <a href="#">extracellular region</a> | Cellular component | 21 | 1807 | 171 | 23539 | 1.59975339566404 | 0.0219725371378701 | 0.892423046830416 | 1.65811979281281 | <a href="#">//CIQTNF6//EMID2</a><br><a href="#">//ECM2//PCSK5</a><br><a href="#">//PROM1//CCL24</a><br><a href="#">//HNF1//LPH</a><br><a href="#">//KCP//EGFL7</a><br><a href="#">//GRIN2B//SVS5</a><br><a href="#">//ADAM23//CIRA</a><br><a href="#">//ACPP//ZPBP2</a><br><a href="#">//PRSS23</a><br><a href="#">//FAM180A//SCGN</a><br><a href="#">//KLHL11//PRSS48</a>                                                                                                                                                                                                                                                                                                                                                                                                                                                                                                                                                                                                                                                                                                                                                                                                                                                                                                                                                                                                                                                                                                                                                                 |
| GO:0032993 | <a href="#">protein-DNA complex</a>  | Cellular component | 3  | 89   | 171 | 23539 | 4.64005519416519 | 0.0271437352961879 | 0.969529788708876 | 1.56633038855176 | <a href="#">//TERF2//HIST3H2A</a><br><a href="#">//HHEX</a>                                                                                                                                                                                                                                                                                                                                                                                                                                                                                                                                                                                                                                                                                                                                                                                                                                                                                                                                                                                                                                                                                                                                                                                                                                                                                                                                                                                                                                                                                |

|            |                                         |                    |    |      |     |       |                  |                    |                   |                  |                                                                                                                                                                                                                                                                                                                                                                                                                                                                                                                                                                                                                                                                                                                             |
|------------|-----------------------------------------|--------------------|----|------|-----|-------|------------------|--------------------|-------------------|------------------|-----------------------------------------------------------------------------------------------------------------------------------------------------------------------------------------------------------------------------------------------------------------------------------------------------------------------------------------------------------------------------------------------------------------------------------------------------------------------------------------------------------------------------------------------------------------------------------------------------------------------------------------------------------------------------------------------------------------------------|
| GO:0031982 | <a href="#">vesicle</a>                 | Cellular component | 11 | 783  | 171 | 23539 | 1.93385016393687 | 0.0281697528332065 | 0.969529788708876 | 1.55021696358027 | ZBP2//PCSK5<br>/ACPP//GRIN2B<br>/BALP2L2<br>/SYNRG<br>/FAM109B//PRDX6<br>/SCGN//PROM1<br>/STMN2                                                                                                                                                                                                                                                                                                                                                                                                                                                                                                                                                                                                                             |
| GO:0005923 | <a href="#">tight junction</a>          | Cellular component | 3  | 94   | 171 | 23539 | 4.39324374766704 | 0.0312159212273691 | 0.969529788708876 | 1.50562384387992 | ATP7B//MAG3<br>/CLDN17                                                                                                                                                                                                                                                                                                                                                                                                                                                                                                                                                                                                                                                                                                      |
| GO:0070160 | <a href="#">occluding junction</a>      | Cellular component | 3  | 94   | 171 | 23539 | 4.39324374766704 | 0.0312159212273691 | 0.969529788708876 | 1.50562384387992 | ATP7B//MAG3<br>/CLDN17                                                                                                                                                                                                                                                                                                                                                                                                                                                                                                                                                                                                                                                                                                      |
| GO:0071944 | <a href="#">cell periphery</a>          | Cellular component | 36 | 3670 | 171 | 23539 | 1.35029399110856 | 0.0344283262345285 | 1                 | 1.46308409041695 | ADORA3//ADRA2C<br>/ATP7B//BFS1<br>/CACNB1<br>/CTNNA2//GALR2<br>/GRIN2B//HEPH<br>/PROM1//ADAM23<br>/TRFR2//ACPP<br>/CD200R1//LIMA1<br>/GOLPH3<br>/SLC16A9<br>/GPRC5//CD248<br>/TNSRF2.2<br>/PCDH19//MAG3<br>/CHRN4//ANK2<br>/BALP2L2<br>/MRGPRE//LIPH<br>/CLDN17<br>/ACVRLC//JPH4<br>/SLR2//FAM84B<br>/GJA6//MARCKS<br>/KLRCL//SLC9A3                                                                                                                                                                                                                                                                                                                                                                                        |
| GO:0042734 | <a href="#">presynaptic membrane</a>    | Cellular component | 2  | 42   | 171 | 23539 | 6.55499860763019 | 0.0373660505841328 | 1                 | 1.42752280260954 | ADORA3//GRIN2B                                                                                                                                                                                                                                                                                                                                                                                                                                                                                                                                                                                                                                                                                                              |
| GO:0005886 | <a href="#">plasma membrane</a>         | Cellular component | 35 | 3583 | 171 | 23539 | 1.34466200854261 | 0.0389759835133563 | 1                 | 1.40920291708757 | ADORA3//ADRA2C<br>/PROM1//ANK2<br>/CACNB1<br>/CHRN4//GJA6<br>/ATP7B//MAG3<br>/CLDN17//LIMA1<br>/KLRCL//CD200R1<br>/CTNNA2//SLC9A3<br>/GRIN2B<br>/ACVRLC//BFS1<br>/GALR2//HEPH<br>/ADAM23//TRFR2<br>/ACPP//GOLPH3<br>/SLC16A9<br>/GPRC5//CD248<br>/TNSRF2.2<br>/PCDH19<br>/BALP2L2<br>/MRGPRE//LIPH<br>/JPH4//SLR2<br>/FAM84B                                                                                                                                                                                                                                                                                                                                                                                                |
| GO:0043229 | <a href="#">intracellular organelle</a> | Cellular component | 80 | 9449 | 171 | 23539 | 1.16545641452204 | 0.0453092374583936 | 1                 | 1.34381324681218 | CHST12//CHST1<br>/TUBG2//TERT2<br>/MBD4//HIST3H2A<br>/LATS1//LATS2<br>/ZBP2//BFS1<br>/LIMA1//PRDX6<br>/ACPP//GOLPH3<br>/TCE25//GPRC5C<br>/CSTAD//EFHD1<br>/NTSDC3//CHDH<br>/ABA1//PCP1<br>/BMD2//SERINC5<br>/JPH4//UNX1T1<br>/CIRBP//HHEX<br>/HMGA1//HOXB6<br>/PIAS2//NKC3-1<br>/PTX1//REX2<br>/SIX1//ZBTB17<br>/ZFP2//ZFP62<br>/HEYL//TCEAL8<br>/STK35//SECI4L2<br>/SMARCC2<br>/DYRK2//CASZ1<br>/TEX19.2//ZFP618<br>/PRSS23//ESRP2<br>/LSM9//MAG3<br>/TTC5//MKL1<br>/JPK3//UBASH3A<br>/FOXO6//TCEAL5<br>/STMN2//MIB2<br>/FAM109B//ATP7B<br>/DUOXA1//PCSK5<br>/NAGPA<br>/B4GALT2<br>/GOLGA7B<br>/SYNRG//CLDN17<br>/MARCKS<br>/CTNNA2//KIF9<br>/KATNAL2//ANK2<br>/WHRN//GRIN2B<br>/CACNB1//ENKUR<br>/BALP2L2//SCGN<br>/PROM1 |
| GO:0043296 | <a href="#">apical junction complex</a> | Cellular component | 3  | 110  | 171 | 23539 | 3.75422647527911 | 0.0462599966350328 | 1                 | 1.33479440315612 | ATP7B//MAG3<br>/CLDN17                                                                                                                                                                                                                                                                                                                                                                                                                                                                                                                                                                                                                                                                                                      |

|            |                                              |                    |    |      |     |       |                  |                    |   |                  |                                                                                                                                                                                                                                                                                                                                                                                                                                                                                                                                                                                                                                                                                                                                                                                                                                                                                                                                                                                                                                                                                                                                                                                                                                                                                                                                                                                                                                                                                                                                                                                                                                                                                                                                                                                                                                                                                                                                                                                                                                                            |
|------------|----------------------------------------------|--------------------|----|------|-----|-------|------------------|--------------------|---|------------------|------------------------------------------------------------------------------------------------------------------------------------------------------------------------------------------------------------------------------------------------------------------------------------------------------------------------------------------------------------------------------------------------------------------------------------------------------------------------------------------------------------------------------------------------------------------------------------------------------------------------------------------------------------------------------------------------------------------------------------------------------------------------------------------------------------------------------------------------------------------------------------------------------------------------------------------------------------------------------------------------------------------------------------------------------------------------------------------------------------------------------------------------------------------------------------------------------------------------------------------------------------------------------------------------------------------------------------------------------------------------------------------------------------------------------------------------------------------------------------------------------------------------------------------------------------------------------------------------------------------------------------------------------------------------------------------------------------------------------------------------------------------------------------------------------------------------------------------------------------------------------------------------------------------------------------------------------------------------------------------------------------------------------------------------------------|
| GO:0043226 | <a href="#">organelle</a>                    | Cellular component | 80 | 9472 | 171 | 23539 | 1.16262644223171 | 0.0478806691673072 | 1 | 1.31983978864077 | <a href="#">CHST2</a> / <a href="#">CHST1</a><br><a href="#">TUBG2</a> / <a href="#">TERF2</a><br><a href="#">MBD4</a> / <a href="#">HIST3H2A</a><br><a href="#">LATS1</a> / <a href="#">LATS2</a><br><a href="#">ZBP2</a> / <a href="#">BESP1</a><br><a href="#">LIMA1</a> / <a href="#">PRDX6</a><br><a href="#">ACPP</a> / <a href="#">GOLPH3</a><br><a href="#">TCE3</a> / <a href="#">GPRCSC</a><br><a href="#">CSTAD</a> / <a href="#">EFHD1</a><br><a href="#">NTSDC3</a> / <a href="#">CHDH</a><br><a href="#">ABAT</a> / <a href="#">PDP1</a><br><a href="#">EMID2</a> / <a href="#">SERINC5</a><br><a href="#">JPH4</a> / <a href="#">RUNX1T1</a><br><a href="#">CTRB9</a> / <a href="#">HHEX</a><br><a href="#">HMGAL1</a> / <a href="#">FOXO6</a><br><a href="#">PIAS2</a> / <a href="#">NKK3-1</a><br><a href="#">PTX1</a> / <a href="#">RFX2</a><br><a href="#">SIX1</a> / <a href="#">ZBTB17</a><br><a href="#">ZFP2</a> / <a href="#">ZFP62</a><br><a href="#">HEY1</a> / <a href="#">TCEAL8</a><br><a href="#">STK35</a> / <a href="#">SEC14L2</a><br><a href="#">SMARCC2</a><br><a href="#">DYRK2</a> / <a href="#">CASZ1</a><br><a href="#">TEX19.2</a> / <a href="#">ZFP618</a><br><a href="#">PRSS23</a> / <a href="#">ESRP2</a><br><a href="#">LSM6</a> / <a href="#">MAGI3</a><br><a href="#">TTC5</a> / <a href="#">MKL1</a><br><a href="#">IPGK3</a> / <a href="#">UBASH3A</a><br><a href="#">FOXO6</a> / <a href="#">TCEAL5</a><br><a href="#">STMN2</a> / <a href="#">MIB2</a><br><a href="#">FAM109B</a> / <a href="#">ATP7B</a><br><a href="#">DUOX1</a> / <a href="#">PCSK5</a><br><a href="#">NAGPA</a><br><a href="#">B4GALT2</a><br><a href="#">GOLGA7B</a><br><a href="#">SYNRG</a> / <a href="#">CLDN17</a><br><a href="#">MARCKS</a><br><a href="#">CTNNA2</a> / <a href="#">KIF9</a><br><a href="#">KATNAL2</a> / <a href="#">ANK2</a><br><a href="#">WHRN</a> / <a href="#">GRIN2B</a><br><a href="#">BAIAP2L2</a><br><a href="#">CACNB1</a> / <a href="#">ENKUR</a><br><a href="#">SCGN</a> / <a href="#">PROM1</a> |
| GO:0016327 | <a href="#">apicolateral plasma membrane</a> | Cellular component | 3  | 113  | 171 | 23539 | 3.65455674584692 | 0.0494144857913852 | 1 | 1.3061457195569  | <a href="#">ATP7B</a> / <a href="#">MAGI3</a><br><a href="#">CLDN17</a>                                                                                                                                                                                                                                                                                                                                                                                                                                                                                                                                                                                                                                                                                                                                                                                                                                                                                                                                                                                                                                                                                                                                                                                                                                                                                                                                                                                                                                                                                                                                                                                                                                                                                                                                                                                                                                                                                                                                                                                    |
| GO:0031988 | <a href="#">membrane-bounded vesicle</a>     | Cellular component | 8  | 554  | 171 | 23539 | 1.98779741170013 | 0.049821446112714  | 1 | 1.30258367083744 | <a href="#">ZBP2</a> / <a href="#">PCSK5</a><br><a href="#">ACPP</a> / <a href="#">GRIN2B</a><br><a href="#">BAIAP2L2</a><br><a href="#">SYNRG</a><br><a href="#">FAM109B</a><br><a href="#">PROM1</a>                                                                                                                                                                                                                                                                                                                                                                                                                                                                                                                                                                                                                                                                                                                                                                                                                                                                                                                                                                                                                                                                                                                                                                                                                                                                                                                                                                                                                                                                                                                                                                                                                                                                                                                                                                                                                                                     |
