# Supplementary material
Source: PubMed Central journal article supplement (PMC4556938)
Supplement: Table_S5.pdf [file Table_S5.pdf]

**Supplementary Table 5. Biological process analysis of differentially upregulated genes.**

| GO.ID      | Term                                                                      | Ontology           | Count | Pop.Hits | List.Total | Pop.Total | Fold.Enrichment  | Pvalue               | FDR               | Enrichment.Score | GENES                                                                                                                                                                                                                                                                                                                                                                                                                                                                                                                                                                                                                                                                                                                                                                                                                                                                                                                                                                                                                                                                                                                                                                                                                                                                                                                                                                                                                                                                                                          |
|------------|---------------------------------------------------------------------------|--------------------|-------|----------|------------|-----------|------------------|----------------------|-------------------|------------------|----------------------------------------------------------------------------------------------------------------------------------------------------------------------------------------------------------------------------------------------------------------------------------------------------------------------------------------------------------------------------------------------------------------------------------------------------------------------------------------------------------------------------------------------------------------------------------------------------------------------------------------------------------------------------------------------------------------------------------------------------------------------------------------------------------------------------------------------------------------------------------------------------------------------------------------------------------------------------------------------------------------------------------------------------------------------------------------------------------------------------------------------------------------------------------------------------------------------------------------------------------------------------------------------------------------------------------------------------------------------------------------------------------------------------------------------------------------------------------------------------------------|
| GO:0048856 | <a href="#">anatomical structure development</a>                          | Biological process | 22    | 3218     | 76         | 23448     | 2.10925386804488 | 0.000406333936266738 | 0.436844883173175 | 3.3911169046785  | <a href="#">SH3PXD2B</a> // <a href="#">EFNA1</a><br><a href="#">CCCL12</a> // <a href="#">C1GALT1</a><br><a href="#">ADCYAP1</a> // <a href="#">MEIS2</a><br><a href="#">PRM2</a> // <a href="#">YBX2</a><br><a href="#">SYCP2</a> // <a href="#">FOXK2</a><br><a href="#">ENBP1</a> // <a href="#">SEMA6B</a><br><a href="#">ATOH8</a> // <a href="#">MYH7</a><br><a href="#">PPARA</a> // <a href="#">PBX3</a><br><a href="#">HOOK3</a> // <a href="#">CDK13</a><br><a href="#">POU2F1</a> // <a href="#">LMO2</a><br><a href="#">ITGB2</a> // <a href="#">RCAN1</a>                                                                                                                                                                                                                                                                                                                                                                                                                                                                                                                                                                                                                                                                                                                                                                                                                                                                                                                                        |
| GO:0009987 | <a href="#">cellular process</a>                                          | Biological process | 57    | 13121    | 76         | 23448     | 1.34029418489444 | 0.000454073907314605 | 0.436844883173175 | 3.342873453472   | <a href="#">PAPD7</a> // <a href="#">EFNA1</a><br><a href="#">PPARA</a> // <a href="#">FOXK2</a><br><a href="#">LUPF3B</a> // <a href="#">HOOK3</a><br><a href="#">CDK13</a> // <a href="#">PUS3</a><br><a href="#">RPUSD1</a> // <a href="#">RASGRP4</a><br><a href="#">ITGB2</a> // <a href="#">CCCL12</a><br><a href="#">LMO2</a> // <a href="#">RBL2</a><br><a href="#">DNAA1A</a> // <a href="#">ACTIN4</a><br><a href="#">STEAP3</a> // <a href="#">SYCP2</a><br><a href="#">MRAS</a> // <a href="#">OLFR954</a><br><a href="#">OLFR912</a> // <a href="#">OLFR652</a><br><a href="#">OLFR1390</a><br><a href="#">SKGAP3</a><br><a href="#">TAS2R134</a><br><a href="#">HK3</a> // <a href="#">MYH7</a><br><a href="#">2310003H01R1K</a><br><a href="#">PBX3</a> // <a href="#">POU2F1</a><br><a href="#">ZFP318</a> // <a href="#">THAP7</a><br><a href="#">ATOH8</a> // <a href="#">MEIS2</a><br><a href="#">YBX2</a> // <a href="#">SMOK2B</a><br><a href="#">UBE2W</a><br><a href="#">HPD</a> // <a href="#">SMPD4</a><br><a href="#">GGT5</a> // <a href="#">SH3PXD2B</a><br><a href="#">ENBP1</a> // <a href="#">PRM2</a><br><a href="#">EPOR</a> // <a href="#">ADCYAP1</a><br><a href="#">NPE</a> // <a href="#">RCAN1</a><br><a href="#">RAB32</a> // <a href="#">AGPAT4</a><br><a href="#">C1GALT1</a> // <a href="#">IFT181</a><br><a href="#">SEMA6B</a><br><a href="#">DCUN1D3</a><br><a href="#">TBC1D15</a> // <a href="#">SFXN3</a><br><a href="#">SLC43A3</a> // <a href="#">SLC5A9</a> |
| GO:0032502 | <a href="#">developmental process</a>                                     | Biological process | 24    | 3757     | 76         | 23448     | 1.97088942745472 | 0.00055859303093856  | 0.436844883173175 | 3.25290448690177 | <a href="#">SH3PXD2B</a> // <a href="#">EFNA1</a><br><a href="#">CCCL12</a> // <a href="#">C1GALT1</a><br><a href="#">ADCYAP1</a> // <a href="#">MEIS2</a><br><a href="#">ITGB2</a> // <a href="#">ITGB2</a><br><a href="#">PRM2</a> // <a href="#">SEMA6B</a><br><a href="#">ATOH8</a> // <a href="#">YBX2</a><br><a href="#">FOXK2</a> // <a href="#">SYCP2</a><br><a href="#">ENBP1</a> // <a href="#">MYH7</a><br><a href="#">PPARA</a> // <a href="#">PBX3</a><br><a href="#">HOOK3</a> // <a href="#">CDK13</a><br><a href="#">RASGRP4</a> // <a href="#">POU2F1</a><br><a href="#">LMO2</a> // <a href="#">RCAN1</a>                                                                                                                                                                                                                                                                                                                                                                                                                                                                                                                                                                                                                                                                                                                                                                                                                                                                                    |
| GO:0032099 | <a href="#">negative regulation of appetite</a>                           | Biological process | 2     | 11       | 76         | 23448     | 56.0956937799043 | 0.000559524550052075 | 0.436844883173175 | 3.25218085333896 | <a href="#">PPARA</a> // <a href="#">NPFF</a>                                                                                                                                                                                                                                                                                                                                                                                                                                                                                                                                                                                                                                                                                                                                                                                                                                                                                                                                                                                                                                                                                                                                                                                                                                                                                                                                                                                                                                                                  |
| GO:0032096 | <a href="#">negative regulation of response to food</a>                   | Biological process | 2     | 12       | 76         | 23448     | 51.4210526315789 | 0.000670019640561262 | 0.436844883173175 | 3.17391246645983 | <a href="#">PPARA</a> // <a href="#">NPFF</a>                                                                                                                                                                                                                                                                                                                                                                                                                                                                                                                                                                                                                                                                                                                                                                                                                                                                                                                                                                                                                                                                                                                                                                                                                                                                                                                                                                                                                                                                  |
| GO:0007275 | <a href="#">multicellular organismal development</a>                      | Biological process | 22    | 3369     | 76         | 23448     | 2.01471622064958 | 0.000768301481410888 | 0.436844883173175 | 3.11446832942032 | <a href="#">SH3PXD2B</a> // <a href="#">EFNA1</a><br><a href="#">CCCL12</a> // <a href="#">C1GALT1</a><br><a href="#">ADCYAP1</a> // <a href="#">MEIS2</a><br><a href="#">FOXK2</a> // <a href="#">SYCP2</a><br><a href="#">ENBP1</a> // <a href="#">SEMA6B</a><br><a href="#">ATOH8</a> // <a href="#">MYH7</a><br><a href="#">PPARA</a> // <a href="#">PBX3</a><br><a href="#">HOOK3</a> // <a href="#">CDK13</a><br><a href="#">POU2F1</a> // <a href="#">LMO2</a><br><a href="#">ITGB2</a> // <a href="#">RCAN1</a><br><a href="#">IFT181</a> // <a href="#">PRM2</a>                                                                                                                                                                                                                                                                                                                                                                                                                                                                                                                                                                                                                                                                                                                                                                                                                                                                                                                                      |
| GO:0001522 | <a href="#">pseudouridine synthesis</a>                                   | Biological process | 2     | 14       | 76         | 23448     | 44.0751879699248 | 0.000919940866831686 | 0.436844883173175 | 3.03624008790886 | <a href="#">PUS3</a> // <a href="#">RPUSD1</a>                                                                                                                                                                                                                                                                                                                                                                                                                                                                                                                                                                                                                                                                                                                                                                                                                                                                                                                                                                                                                                                                                                                                                                                                                                                                                                                                                                                                                                                                 |
| GO:0032105 | <a href="#">negative regulation of response to extracellular stimulus</a> | Biological process | 2     | 16       | 76         | 23448     | 38.5657894736842 | 0.00120802394272032  | 0.436844883173175 | 2.91792445802592 | <a href="#">PPARA</a> // <a href="#">NPFF</a>                                                                                                                                                                                                                                                                                                                                                                                                                                                                                                                                                                                                                                                                                                                                                                                                                                                                                                                                                                                                                                                                                                                                                                                                                                                                                                                                                                                                                                                                  |
| GO:0032108 | <a href="#">negative regulation of response to nutrient levels</a>        | Biological process | 2     | 16       | 76         | 23448     | 38.5657894736842 | 0.00120802394272032  | 0.436844883173175 | 2.91792445802592 | <a href="#">PPARA</a> // <a href="#">NPFF</a>                                                                                                                                                                                                                                                                                                                                                                                                                                                                                                                                                                                                                                                                                                                                                                                                                                                                                                                                                                                                                                                                                                                                                                                                                                                                                                                                                                                                                                                                  |
| GO:0045596 | <a href="#">negative regulation of cell differentiation</a>               | Biological process | 6     | 368      | 76         | 23448     | 5.03032036613272 | 0.00124509673069586  | 0.436844883173175 | 2.90479690722242 | <a href="#">EFNA1</a> // <a href="#">PPARA</a><br><a href="#">LMO2</a> // <a href="#">HOOK3</a><br><a href="#">RCAN1</a> // <a href="#">ADCYAP1</a>                                                                                                                                                                                                                                                                                                                                                                                                                                                                                                                                                                                                                                                                                                                                                                                                                                                                                                                                                                                                                                                                                                                                                                                                                                                                                                                                                            |
| GO:0032098 | <a href="#">regulation of appetite</a>                                    | Biological process | 2     | 17       | 76         | 23448     | 36.297213622291  | 0.00136622243631705  | 0.436844883173175 | 2.86447858689121 | <a href="#">PPARA</a> // <a href="#">NPFF</a>                                                                                                                                                                                                                                                                                                                                                                                                                                                                                                                                                                                                                                                                                                                                                                                                                                                                                                                                                                                                                                                                                                                                                                                                                                                                                                                                                                                                                                                                  |
| GO:0048731 | <a href="#">system development</a>                                        | Biological process | 19    | 2835     | 76         | 23448     | 2.06772486772487 | 0.00143625972197625  | 0.436844883173175 | 2.84276701857426 | <a href="#">SH3PXD2B</a> // <a href="#">EFNA1</a><br><a href="#">CCCL12</a> // <a href="#">C1GALT1</a><br><a href="#">ADCYAP1</a> // <a href="#">MEIS2</a><br><a href="#">SYCP2</a> // <a href="#">ENBP1</a><br><a href="#">SEMA6B</a> // <a href="#">ATOH8</a><br><a href="#">MYH7</a> // <a href="#">PPARA</a><br><a href="#">PBX3</a> // <a href="#">HOOK3</a><br><a href="#">CDK13</a> // <a href="#">POU2F1</a><br><a href="#">LMO2</a> // <a href="#">ITGB2</a><br><a href="#">RCAN1</a>                                                                                                                                                                                                                                                                                                                                                                                                                                                                                                                                                                                                                                                                                                                                                                                                                                                                                                                                                                                                                 |

|            |                                                                  |                    |    |      |    |       |                  |                     |                   |                  |                                                                                                                                                                                                                                                                                                                                                                                                                                                                                                                                                                                     |
|------------|------------------------------------------------------------------|--------------------|----|------|----|-------|------------------|---------------------|-------------------|------------------|-------------------------------------------------------------------------------------------------------------------------------------------------------------------------------------------------------------------------------------------------------------------------------------------------------------------------------------------------------------------------------------------------------------------------------------------------------------------------------------------------------------------------------------------------------------------------------------|
| GO:0034641 | <a href="#">cellular nitrogen compound metabolic process</a>     | Biological process | 27 | 4760 | 76 | 23448 | 1.7500442282176  | 0.00145961175812755 | 0.436844883173175 | 2.83576264676714 | <a href="#">PAPD7/EFNA1</a><br><a href="#">/PPARA/FOXK2</a><br><a href="#">/UPE3B/CDK13</a><br><a href="#">/PUS3/RPUSD1</a><br><a href="#">/LMO2/MRAS</a><br><a href="#">/MYH7</a><br><a href="#">/231000H01RIK</a><br><a href="#">/PBX3/POU2F1</a><br><a href="#">/RBL2/ZFP318</a><br><a href="#">/THAP7/ATOH8</a><br><a href="#">/MEIS2/YBX2</a><br><a href="#">/HPD/GGT3</a><br><a href="#">/ADCYAP1/PRM2</a><br><a href="#">/TBC1D15/SRGAP3</a><br><a href="#">/ITGB2</a>                                                                                                       |
| GO:0032095 | <a href="#">regulation of response to food</a>                   | Biological process | 2  | 18   | 76 | 23448 | 34.280701754386  | 0.00153377748532786 | 0.436844883173175 | 2.81423764162809 | <a href="#">PPARA/NPEF</a>                                                                                                                                                                                                                                                                                                                                                                                                                                                                                                                                                          |
| GO:0032501 | <a href="#">multicellular organismal process</a>                 | Biological process | 30 | 5558 | 76 | 23448 | 1.66530936914074 | 0.0015778168185884  | 0.436844883173175 | 2.80194341893023 | <a href="#">SH3PXD2B/EFNA1</a><br><a href="#">/CCL12/C1GALT1</a><br><a href="#">/ADCYAP1</a><br><a href="#">/TAS2R134/MEIS2</a><br><a href="#">/MYH7/PBX3</a><br><a href="#">/IFN1/ITGB2</a><br><a href="#">/PRM2/SEMA6B</a><br><a href="#">/ATOH8/DNAJA1</a><br><a href="#">/YBX2/FOXK2</a><br><a href="#">/SYCP2/FNBP1</a><br><a href="#">/OLFR954/OLFR912</a><br><a href="#">/OLFR652</a><br><a href="#">/OLFR1390/PPARA</a><br><a href="#">/NPEF/HOOK3</a><br><a href="#">/CDK13/POU2F1</a><br><a href="#">/LMO2/RCAN1</a>                                                      |
| GO:0006807 | <a href="#">nitrogen compound metabolic process</a>              | Biological process | 27 | 4850 | 76 | 23448 | 1.71756918068367 | 0.00194533788467433 | 0.504941955940781 | 2.71100049046091 | <a href="#">PAPD7/EFNA1</a><br><a href="#">/PPARA/FOXK2</a><br><a href="#">/UPE3B/CDK13</a><br><a href="#">/PUS3/RPUSD1</a><br><a href="#">/LMO2/MRAS</a><br><a href="#">/MYH7</a><br><a href="#">/231000H01RIK</a><br><a href="#">/PBX3/POU2F1</a><br><a href="#">/RBL2/ZFP318</a><br><a href="#">/THAP7/ATOH8</a><br><a href="#">/MEIS2/YBX2</a><br><a href="#">/HPD/GGT3</a><br><a href="#">/ADCYAP1/PRM2</a><br><a href="#">/TBC1D15/SRGAP3</a><br><a href="#">/ITGB2</a>                                                                                                       |
| GO:0032094 | <a href="#">response to food</a>                                 | Biological process | 2  | 22   | 76 | 23448 | 28.0478468899522 | 0.00229635348634977 | 0.560985648753564 | 2.63896125854114 | <a href="#">PPARA/NPEF</a>                                                                                                                                                                                                                                                                                                                                                                                                                                                                                                                                                          |
| GO:0006139 | <a href="#">nucleobase-containing compound metabolic process</a> | Biological process | 25 | 4427 | 76 | 23448 | 1.74229905008738 | 0.00253319372953153 | 0.584464086596914 | 2.59633159566178 | <a href="#">PAPD7/EFNA1</a><br><a href="#">/PPARA/FOXK2</a><br><a href="#">/UPE3B/CDK13</a><br><a href="#">/PUS3/RPUSD1</a><br><a href="#">/LMO2/MRAS</a><br><a href="#">/MYH7</a><br><a href="#">/231000H01RIK</a><br><a href="#">/PBX3/POU2F1</a><br><a href="#">/RBL2/ZFP318</a><br><a href="#">/THAP7/ATOH8</a><br><a href="#">/MEIS2/YBX2</a><br><a href="#">/ADCYAP1/PRM2</a><br><a href="#">/TBC1D15/SRGAP3</a><br><a href="#">/ITGB2</a>                                                                                                                                    |
| GO:0030154 | <a href="#">cell differentiation</a>                             | Biological process | 16 | 2336 | 76 | 23448 | 2.11319394376352 | 0.00296031556338369 | 0.647062659722761 | 2.52866199159934 | <a href="#">EFNA1/PRM2</a><br><a href="#">/YBX2/PPARA</a><br><a href="#">/ADCYAP1</a><br><a href="#">/SH3PXD2B/LMO2</a><br><a href="#">/PBX3/RCAN1</a><br><a href="#">/HOOK3/POU2F1</a><br><a href="#">/IFN1/SEMA6B</a><br><a href="#">/ATOH8/C1GALT1</a><br><a href="#">/RASGRP4</a>                                                                                                                                                                                                                                                                                               |
| GO:0032104 | <a href="#">regulation of response to extracellular stimulus</a> | Biological process | 2  | 27   | 76 | 23448 | 22.8538011695906 | 0.00345289603295307 | 0.682851296421624 | 2.46181649810422 | <a href="#">PPARA/NPEF</a>                                                                                                                                                                                                                                                                                                                                                                                                                                                                                                                                                          |
| GO:0032107 | <a href="#">regulation of response to nutrient levels</a>        | Biological process | 2  | 27   | 76 | 23448 | 22.8538011695906 | 0.00345289603295307 | 0.682851296421624 | 2.46181649810422 | <a href="#">PPARA/NPEF</a>                                                                                                                                                                                                                                                                                                                                                                                                                                                                                                                                                          |
| GO:0010721 | <a href="#">negative regulation of cell development</a>          | Biological process | 3  | 96   | 76 | 23448 | 9.64144736842105 | 0.00376643743036249 | 0.71100066583161  | 2.42406924285346 | <a href="#">EFNA1/HOOK3</a><br><a href="#">/ADCYAP1</a>                                                                                                                                                                                                                                                                                                                                                                                                                                                                                                                             |
| GO:0051093 | <a href="#">negative regulation of developmental process</a>     | Biological process | 6  | 466  | 76 | 23448 | 3.97244183419923 | 0.00403806856990294 | 0.729134729165518 | 2.39382631063318 | <a href="#">EFNA1/PPARA</a><br><a href="#">/LMO2/HOOK3</a><br><a href="#">/RCAN1/ADCYAP1</a>                                                                                                                                                                                                                                                                                                                                                                                                                                                                                        |
| GO:0044237 | <a href="#">cellular metabolic process</a>                       | Biological process | 36 | 7615 | 76 | 23448 | 1.45856170300999 | 0.00479301965919554 | 0.829392110193295 | 2.31939078968907 | <a href="#">PAPD7/EFNA1</a><br><a href="#">/PPARA/FOXK2</a><br><a href="#">/UPE3B/CDK13</a><br><a href="#">/PUS3/RPUSD1</a><br><a href="#">/LMO2/DNAJA1</a><br><a href="#">/HK3/MRAS</a><br><a href="#">/MYH7</a><br><a href="#">/231000H01RIK</a><br><a href="#">/PBX3/POU2F1</a><br><a href="#">/RBL2/ZFP318</a><br><a href="#">/THAP7/ATOH8</a><br><a href="#">/MEIS2/YBX2</a><br><a href="#">/SMOK2B/UBE2W</a><br><a href="#">/HPD/SMPD4</a><br><a href="#">/GGT3/SH3PXD2B</a><br><a href="#">/ADCYAP1</a><br><a href="#">/ACBPAT4/C1GALT1</a><br><a href="#">/PRM2/TBC1D15</a> |



|            |                                                                           |                    |    |      |    |       |                  |                    |   |                  |                                                                                                                                                                     |
|------------|---------------------------------------------------------------------------|--------------------|----|------|----|-------|------------------|--------------------|---|------------------|---------------------------------------------------------------------------------------------------------------------------------------------------------------------|
| GO:0051171 | <a href="#">regulation of nitrogen compound metabolic process</a>         | Biological process | 17 | 3009 | 76 | 23448 | 1.74308652988403 | 0.0146739674323446 | 1 | 1.83345244914081 | <a href="#">EFNA1//PPARA//FOXK2//MEIS2//PBX3//POU2F1//RBL2//YBX2//ZFP318//THAP7//ATOH8//ADCYAP1//TBC1D15//SRGAP3//ITGB2//LMO2//CDK13</a>                            |
| GO:0019953 | <a href="#">sexual reproduction</a>                                       | Biological process | 5  | 449  | 76 | 23448 | 3.43570507560661 | 0.0153164834145943 | 1 | 1.81484093502625 | <a href="#">IFT181//DNAJA1//PRM2//YBX2//SYCP2</a>                                                                                                                   |
| GO:0044249 | <a href="#">cellular biosynthetic process</a>                             | Biological process | 21 | 4041 | 76 | 23448 | 1.60332903528309 | 0.0158865133569857 | 1 | 1.79897140776271 | <a href="#">PAPD7//EFNA1//PPARA//FOXK2//LMO2//PBX3//POU2F1//RBL2//ZFP318//THAP7//ATOH8//MEIS2//YBX2//GCT5//ADCYAP1//AGPAT4//LPE3B//CIGALT1//ITGB2//SMPD4//CDK13</a> |
| GO:0007283 | <a href="#">spermatogenesis</a>                                           | Biological process | 4  | 298  | 76 | 23448 | 4.14129282938891 | 0.0160442438581288 | 1 | 1.79468074575329 | <a href="#">PRM2//YBX2//IFT181//DNAJA1</a>                                                                                                                          |
| GO:0048232 | <a href="#">male gamete generation</a>                                    | Biological process | 4  | 298  | 76 | 23448 | 4.14129282938891 | 0.0160442438581288 | 1 | 1.79468074575329 | <a href="#">IFT181//DNAJA1//PRM2//YBX2</a>                                                                                                                          |
| GO:0016070 | <a href="#">RNA metabolic process</a>                                     | Biological process | 17 | 3049 | 76 | 23448 | 1.72021888108267 | 0.0165669165624862 | 1 | 1.78075831502716 | <a href="#">EFNA1//PPARA//FOXK2//LPE3B//CDK13//PUS3//RBL2//LMO2//PBX3//POU2F1//RBL2//ZFP318//THAP7//ATOH8//MEIS2//YBX2//ITGB2</a>                                   |
| GO:0048513 | <a href="#">organ development</a>                                         | Biological process | 13 | 2099 | 76 | 23448 | 1.91083473333166 | 0.0167928838122577 | 1 | 1.7748747168336  | <a href="#">ADCYAP1//MEIS2//SH3PXD2B//CIGALT1//EFNA1//SYCP2//MMHF7//PPARA//FOXK3//CDK13//POU2F1//LMO2//RCAN1</a>                                                    |
| GO:0051100 | <a href="#">negative regulation of binding</a>                            | Biological process | 2  | 65   | 76 | 23448 | 9.49311740890688 | 0.0189031429153361 | 1 | 1.72346598221247 | <a href="#">PPARA//YBX2</a>                                                                                                                                         |
| GO:0031326 | <a href="#">regulation of cellular biosynthetic process</a>               | Biological process | 16 | 2848 | 76 | 23448 | 1.73329390892963 | 0.0189145556902807 | 1 | 1.72320385598507 | <a href="#">EFNA1//PPARA//FOXK2//MEIS2//PBX3//POU2F1//RBL2//YBX2//ZFP318//THAP7//ATOH8//ADCYAP1//LPE3B//ITGB2//LMO2//CDK13</a>                                      |
| GO:0001525 | <a href="#">angiogenesis</a>                                              | Biological process | 4  | 315  | 76 | 23448 | 3.91779448621554 | 0.0192504000823291 | 1 | 1.71556024009095 | <a href="#">EFNA1//ITGB2//CC12//CIGALT1</a>                                                                                                                         |
| GO:2000112 | <a href="#">regulation of cellular macromolecule biosynthetic process</a> | Biological process | 15 | 2628 | 76 | 23448 | 1.76099495313627 | 0.0202932022278477 | 1 | 1.69264941673439 | <a href="#">EFNA1//PPARA//FOXK2//MEIS2//PBX3//POU2F1//RBL2//YBX2//ZFP318//THAP7//ATOH8//LPE3B//LMO2//ITGB2//CDK13</a>                                               |
| GO:0006007 | <a href="#">glucose catabolic process</a>                                 | Biological process | 2  | 68   | 76 | 23448 | 9.07430340557276 | 0.0205741368688245 | 1 | 1.68667837536087 | <a href="#">HK3//PPARA</a>                                                                                                                                          |
| GO:0031589 | <a href="#">cell-substrate adhesion</a>                                   | Biological process | 3  | 180  | 76 | 23448 | 5.14210526315789 | 0.0207752955897441 | 1 | 1.68245278838229 | <a href="#">ITGB2//EPDR1//EFNA1</a>                                                                                                                                 |
| GO:0009889 | <a href="#">regulation of biosynthetic process</a>                        | Biological process | 16 | 2883 | 76 | 23448 | 1.7122514924147  | 0.0210062268023227 | 1 | 1.67765194978794 | <a href="#">EFNA1//PPARA//FOXK2//MEIS2//PBX3//POU2F1//RBL2//YBX2//ZFP318//THAP7//ATOH8//ADCYAP1//LPE3B//ITGB2//LMO2//CDK13</a>                                      |
| GO:0009058 | <a href="#">biosynthetic process</a>                                      | Biological process | 21 | 4158 | 76 | 23448 | 1.55821371610845 | 0.0214369193961027 | 1 | 1.66883762501471 | <a href="#">PAPD7//EFNA1//PPARA//FOXK2//LMO2//PBX3//POU2F1//RBL2//ZFP318//THAP7//ATOH8//MEIS2//YBX2//GCT5//ADCYAP1//AGPAT4//LPE3B//CIGALT1//ITGB2//SMPD4//CDK13</a> |
| GO:0006355 | <a href="#">regulation of transcription, DNA dependent</a>                | Biological process | 14 | 2414 | 76 | 23448 | 1.78929926307068 | 0.0220538978710086 | 1 | 1.6565146409234  | <a href="#">EFNA1//PPARA//FOXK2//POU2F1//THAP7//LMO2//MEIS2//ITGB2//CDK13//PBX3//RBL2//YBX2//ZFP318//ATOH8</a>                                                      |
| GO:0019320 | <a href="#">hexose catabolic process</a>                                  | Biological process | 2  | 71   | 76 | 23448 | 8.69088213491475 | 0.0223045521542609 | 1 | 1.65160649239035 | <a href="#">HK3//PPARA</a>                                                                                                                                          |
| GO:0007264 | <a href="#">small GTPase mediated signal transduction</a>                 | Biological process | 5  | 499  | 76 | 23448 | 3.09144604999473 | 0.0230021176078838 | 1 | 1.63823218037003 | <a href="#">RASGRP4//MRAS//RAB32</a>                                                                                                                                |

|            |                                                                  |                    |    |      |    |       |                  |                    |   |                  |                                                                                                                                      |
|------------|------------------------------------------------------------------|--------------------|----|------|----|-------|------------------|--------------------|---|------------------|--------------------------------------------------------------------------------------------------------------------------------------|
| GO:2001141 | <a href="#">regulation of RNA biosynthetic process</a>           | Biological process | 14 | 2431 | 76 | 23448 | 1.77678668081145 | 0.023282198819494  | 1 | 1.63297600640709 | <a href="#">EFNA1//PPARA//FOXK2//MEIS2//PBX3//POU2F1//RBL2//YBX2//ZFP38//THAP7//ATOH8//LMO2//ITGB2//CDK13</a>                        |
| GO:0072358 | <a href="#">cardiovascular system development</a>                | Biological process | 6  | 684  | 76 | 23448 | 2.70637119113573 | 0.0235383653088266 | 1 | 1.62822370130599 | <a href="#">EFNA1//CCL12//CIGAL1//SH3PX2B//MYH7//ITGB2</a>                                                                           |
| GO:0072359 | <a href="#">circulatory system development</a>                   | Biological process | 6  | 684  | 76 | 23448 | 2.70637119113573 | 0.0235383653088266 | 1 | 1.62822370130599 | <a href="#">EFNA1//CCL12//CIGAL1//SH3PX2B//MYH7//ITGB2</a>                                                                           |
| GO:0022414 | <a href="#">reproductive process</a>                             | Biological process | 7  | 879  | 76 | 23448 | 2.45697862403449 | 0.0237093515876742 | 1 | 1.62508032310936 | <a href="#">ADCYAP1//ZFP318//SYCP2//TF181//DNAJA1//PRM2//YBX2</a>                                                                    |
| GO:0032504 | <a href="#">multicellular organism reproduction</a>              | Biological process | 5  | 505  | 76 | 23448 | 3.05471599791558 | 0.0240658359536342 | 1 | 1.61859904802174 | <a href="#">ADCYAP1//TF181//DNAJA1//PRM2//YBX2</a>                                                                                   |
| GO:0048609 | <a href="#">multicellular organismal reproductive process</a>    | Biological process | 5  | 505  | 76 | 23448 | 3.05471599791558 | 0.0240658359536342 | 1 | 1.61859904802174 | <a href="#">ADCYAP1//TF181//DNAJA1//PRM2//YBX2</a>                                                                                   |
| GO:0046365 | <a href="#">monosaccharide catabolic process</a>                 | Biological process | 2  | 74   | 76 | 23448 | 8.33854907539118 | 0.0240931120004325 | 1 | 1.61810710048623 | <a href="#">HK3//PPARA</a>                                                                                                           |
| GO:0000003 | <a href="#">reproduction</a>                                     | Biological process | 7  | 882  | 76 | 23448 | 2.44862155388471 | 0.0240990138540236 | 1 | 1.61800072864996 | <a href="#">ADCYAP1//ZFP318//SYCP2//TF181//DNAJA1//PRM2//YBX2</a>                                                                    |
| GO:0010556 | <a href="#">regulation of macromolecule biosynthetic process</a> | Biological process | 15 | 2694 | 76 | 23448 | 1.71785253780331 | 0.0248129933596661 | 1 | 1.60532084067869 | <a href="#">EFNA1//PPARA//FOXK2//MEIS2//PBX3//POU2F1//RBL2//YBX2//ZFP38//THAP7//ATOH8//LMO2//ITGB2//CDK13</a>                        |
| GO:0007049 | <a href="#">cell cycle</a>                                       | Biological process | 8  | 1095 | 76 | 23448 | 2.25407354001442 | 0.0251981878403825 | 1 | 1.59863069093357 | <a href="#">RBL2//PAPD7//ZFP318//SYCP2//DCUN1D3//ADCYAP1//STEAP3//CDK13</a>                                                          |
| GO:0007286 | <a href="#">spermatid development</a>                            | Biological process | 2  | 77   | 76 | 23448 | 8.01367053998633 | 0.025938558231869  | 1 | 1.586054167394   | <a href="#">PRM2//YBX2</a>                                                                                                           |
| GO:0045595 | <a href="#">regulation of cell differentiation</a>               | Biological process | 7  | 902  | 76 | 23448 | 2.3943283930447  | 0.0268108833178415 | 1 | 1.57168887741045 | <a href="#">EFNA1//PPARA//ADCYAP1//SH3PX2B//LMO2//HOOK3//KCAN1</a>                                                                   |
| GO:0009056 | <a href="#">catabolic process</a>                                | Biological process | 11 | 1776 | 76 | 23448 | 1.91091749644381 | 0.0275186260058141 | 1 | 1.56037325404807 | <a href="#">UPE3B//HK3//MRAS//MTH7//HFD//SMPD4//PLD3//TBC1D15//ADCYAP1//SRGAP3//PPARA</a>                                            |
| GO:0006351 | <a href="#">transcription, DNA-dependent</a>                     | Biological process | 14 | 2485 | 76 | 23448 | 1.73817642698295 | 0.0275302107020263 | 1 | 1.56019046472809 | <a href="#">EFNA1//PPARA//FOXK2//LMO2//MEIS2//PBX3//POU2F1//RBL2//YBX2//ZFP318//THAP7//ATOH8//ITGB2//CDK13</a>                       |
| GO:0034645 | <a href="#">cellular macromolecule biosynthetic process</a>      | Biological process | 17 | 3232 | 76 | 23448 | 1.62281787389265 | 0.0278027297127386 | 1 | 1.55591256232003 | <a href="#">PAPD7//EFNA1//PPARA//FOXK2//LMO2//PBX3//POU2F1//RBL2//ZFP318//THAP7//ATOH8//MEIS2//YBX2//UPE3B//CIGAL1//ITGB2//CDK13</a> |
| GO:0050768 | <a href="#">negative regulation of neurogenesis</a>              | Biological process | 2  | 80   | 76 | 23448 | 7.71315789473684 | 0.0278396510360596 | 1 | 1.55533621281376 | <a href="#">ADCYAP1//HOOK3</a>                                                                                                       |
| GO:0051252 | <a href="#">regulation of RNA metabolic process</a>              | Biological process | 14 | 2497 | 76 | 23448 | 1.7298231562085  | 0.0285485111783677 | 1 | 1.54441653553999 | <a href="#">EFNA1//PPARA//FOXK2//MEIS2//PBX3//POU2F1//RBL2//YBX2//ZFP318//THAP7//ATOH8//LMO2//ITGB2//CDK13</a>                       |
| GO:0032774 | <a href="#">RNA biosynthetic process</a>                         | Biological process | 14 | 2503 | 76 | 23448 | 1.72567655655319 | 0.0290681145633826 | 1 | 1.53658313683206 | <a href="#">EFNA1//PPARA//FOXK2//LMO2//PBX3//POU2F1//RBL2//ZFP318//THAP7//ATOH8//MEIS2//YBX2//ITGB2//CDK13</a>                       |
| GO:0048515 | <a href="#">spermatid differentiation</a>                        | Biological process | 2  | 82   | 76 | 23448 | 7.52503209242619 | 0.0291373569635716 | 1 | 1.53554984543478 | <a href="#">PRM2//YBX2</a>                                                                                                           |
| GO:0048610 | <a href="#">cellular process involved in reproduction</a>        | Biological process | 4  | 369  | 76 | 23448 | 3.34445877074497 | 0.0319436100166995 | 1 | 1.49561600486197 | <a href="#">ZFP318//SYCP2//PRM2//YBX2</a>                                                                                            |
| GO:0001821 | <a href="#">histamine secretion</a>                              | Biological process | 1  | 10   | 76 | 23448 | 30.8526315789474 | 0.0319495055956742 | 1 | 1.49553585796667 | <a href="#">ADCYAP1</a>                                                                                                              |
| GO:0003188 | <a href="#">heart valve formation</a>                            | Biological process | 1  | 10   | 76 | 23448 | 30.8526315789474 | 0.0319495055956742 | 1 | 1.49553585796667 | <a href="#">EFNA1</a>                                                                                                                |

|            |                                                                             |                    |    |      |    |       |                  |                    |   |                  |                                                                                                                                                                                                                                                |
|------------|-----------------------------------------------------------------------------|--------------------|----|------|----|-------|------------------|--------------------|---|------------------|------------------------------------------------------------------------------------------------------------------------------------------------------------------------------------------------------------------------------------------------|
| GO:0006570 | <a href="#">tyrosine metabolic process</a>                                  | Biological process | 1  | 10   | 76 | 23448 | 30.8526315789474 | 0.0319495055956742 | 1 | 1.49553585796667 | <a href="#">HPD</a>                                                                                                                                                                                                                            |
| GO:0010719 | <a href="#">negative regulation of epithelial to mesenchymal transition</a> | Biological process | 1  | 10   | 76 | 23448 | 30.8526315789474 | 0.0319495055956742 | 1 | 1.49553585796667 | <a href="#">EFNA1</a>                                                                                                                                                                                                                          |
| GO:0003006 | <a href="#">developmental process involved in reproduction</a>              | Biological process | 4  | 370  | 76 | 23448 | 3.33541963015647 | 0.0322157164028976 | 1 | 1.49193220650712 | <a href="#">ADCYAP1/PRM2/YBX2/SYCP2</a>                                                                                                                                                                                                        |
| GO:0008016 | <a href="#">regulation of heart contraction</a>                             | Biological process | 2  | 88   | 76 | 23448 | 7.01196172248804 | 0.0331720476022552 | 1 | 1.47922772007188 | <a href="#">MYH7/NPFF</a>                                                                                                                                                                                                                      |
| GO:0031323 | <a href="#">regulation of cellular metabolic process</a>                    | Biological process | 19 | 3822 | 76 | 23448 | 1.53375196232339 | 0.0336724592310317 | 1 | 1.47272516423369 | <a href="#">EFNA1/PPARA/FOXK2/MEIS2/PBX3/POU2F1/RBL2/YBX2/ZFP318/THAP7/ATO8/ADCYAP1/LPE3B/TBC1D15/SRGA3/RCAN1/TIGB2/LMO2/CDK13</a>                                                                                                             |
| GO:0009059 | <a href="#">macromolecule biosynthetic process</a>                          | Biological process | 17 | 3316 | 76 | 23448 | 1.58170909783506 | 0.0345888980780474 | 1 | 1.46106327337871 | <a href="#">PAPD7/EFNA1/PPARA/FOXK2/LMO2/PBX3/POU2F1/RBL2/ZFP318/THAP7/ATO8/MEIS2/YBX2/LPE3B/CIGAL1/TIGB2/CDK13</a>                                                                                                                            |
| GO:0009991 | <a href="#">response to extracellular stimulus</a>                          | Biological process | 3  | 220  | 76 | 23448 | 4.20717703349282 | 0.0347350769885942 | 1 | 1.45923173419614 | <a href="#">PPARA/NPFF/KASGRP4</a>                                                                                                                                                                                                             |
| GO:0055080 | <a href="#">cation homeostasis</a>                                          | Biological process | 4  | 380  | 76 | 23448 | 3.24764542936288 | 0.035012166220668  | 1 | 1.45578101838153 | <a href="#">ADCYAP1/NPFF/STEAP3/SENN3</a>                                                                                                                                                                                                      |
| GO:002674  | <a href="#">negative regulation of acute inflammatory response</a>          | Biological process | 1  | 11   | 76 | 23448 | 28.0478468899522 | 0.0350885037002363 | 1 | 1.45483515126553 | <a href="#">ADCYAP1</a>                                                                                                                                                                                                                        |
| GO:0010885 | <a href="#">regulation of cholesterol storage</a>                           | Biological process | 1  | 11   | 76 | 23448 | 28.0478468899522 | 0.0350885037002363 | 1 | 1.45483515126553 | <a href="#">PPARA</a>                                                                                                                                                                                                                          |
| GO:0022617 | <a href="#">extracellular matrix disassembly</a>                            | Biological process | 1  | 11   | 76 | 23448 | 28.0478468899522 | 0.0350885037002363 | 1 | 1.45483515126553 | <a href="#">SH3PXD2B</a>                                                                                                                                                                                                                       |
| GO:0030730 | <a href="#">sequestering of triphosphate</a>                                | Biological process | 1  | 11   | 76 | 23448 | 28.0478468899522 | 0.0350885037002363 | 1 | 1.45483515126553 | <a href="#">PPARA</a>                                                                                                                                                                                                                          |
| GO:0046321 | <a href="#">positive regulation of fatty acid oxidation</a>                 | Biological process | 1  | 11   | 76 | 23448 | 28.0478468899522 | 0.0350885037002363 | 1 | 1.45483515126553 | <a href="#">PPARA</a>                                                                                                                                                                                                                          |
| GO:0070252 | <a href="#">actin-mediated cell contraction</a>                             | Biological process | 1  | 11   | 76 | 23448 | 28.0478468899522 | 0.0350885037002363 | 1 | 1.45483515126553 | <a href="#">MYH7</a>                                                                                                                                                                                                                           |
| GO:0019233 | <a href="#">sensory perception of pain</a>                                  | Biological process | 2  | 92   | 76 | 23448 | 6.7070938215103  | 0.0359763216214746 | 1 | 1.44398324291267 | <a href="#">NPFF/ADCYAP1</a>                                                                                                                                                                                                                   |
| GO:0046164 | <a href="#">alcohol catabolic process</a>                                   | Biological process | 2  | 92   | 76 | 23448 | 6.7070938215103  | 0.0359763216214746 | 1 | 1.44398324291267 | <a href="#">HK3/PPARA</a>                                                                                                                                                                                                                      |
| GO:0043542 | <a href="#">endothelial cell migration</a>                                  | Biological process | 2  | 93   | 76 | 23448 | 6.63497453310696 | 0.0366913058412884 | 1 | 1.43543683145545 | <a href="#">EFNA1/TIGB2</a>                                                                                                                                                                                                                    |
| GO:0050794 | <a href="#">regulation of cellular process</a>                              | Biological process | 34 | 8027 | 76 | 23448 | 1.30682630333152 | 0.0368159394190156 | 1 | 1.43396411331061 | <a href="#">EFNA1/PPARA/FOXK2/RBL2/MRAS/OLFR954/OLFR912/OLFR652/OLFR1390/SRGA3/TAS2R134/KASGRP4/MEIS2/PBX3/POU2F1/YBX2/ZFP318/THAP7/ATO8/STEAP3/ADCYAP1/NPFF/TIGB2/RCAN1/RAB33/LPE3B/ACTN4/DCUN1D3/DNAJ1/TBC1D15/SH3PXD2B/LMO2/HOOK3/CDK13</a> |
| GO:0002526 | <a href="#">acute inflammatory response</a>                                 | Biological process | 2  | 94   | 76 | 23448 | 6.56438969764838 | 0.037411771586822  | 1 | 1.42699172585248 | <a href="#">ADCYAP1/SAA3</a>                                                                                                                                                                                                                   |
| GO:0061351 | <a href="#">neural precursor cell proliferation</a>                         | Biological process | 2  | 94   | 76 | 23448 | 6.56438969764838 | 0.037411771586822  | 1 | 1.42699172585248 | <a href="#">HOOK3/ADCYAP1</a>                                                                                                                                                                                                                  |
| GO:0065009 | <a href="#">regulation of molecular function</a>                            | Biological process | 11 | 1871 | 76 | 23448 | 1.81389068609525 | 0.0381970087233191 | 1 | 1.41797064614123 | <a href="#">EFNA1/ADCYAP1/PPARA/TBC1D15/SRGA3/RBL2/RCAN1/KASGRP4/FOXK2/TIGB2/YBX2</a>                                                                                                                                                          |

|            |                                                                                           |                    |    |      |    |       |                  |                    |   |                  |                                                                                                         |
|------------|-------------------------------------------------------------------------------------------|--------------------|----|------|----|-------|------------------|--------------------|---|------------------|---------------------------------------------------------------------------------------------------------|
| GO:0002087 | <a href="#">regulation of respiratory gaseous exchange by neurological system process</a> | Biological process | 1  | 12   | 76 | 23448 | 25.7105263157895 | 0.0382174567965705 | 1 | 1.41773821670447 | <a href="#">PBX3</a>                                                                                    |
| GO:0002862 | <a href="#">negative regulation of inflammatory response to antigenic stimulus</a>        | Biological process | 1  | 12   | 76 | 23448 | 25.7105263157895 | 0.0382174567965705 | 1 | 1.41773821670447 | <a href="#">ADCYAP1</a>                                                                                 |
| GO:0010771 | <a href="#">negative regulation of cell morphogenesis involved in differentiation</a>     | Biological process | 1  | 12   | 76 | 23448 | 25.7105263157895 | 0.0382174567965705 | 1 | 1.41773821670447 | <a href="#">EFNA1</a>                                                                                   |
| GO:0010878 | <a href="#">cholesterol storage</a>                                                       | Biological process | 1  | 12   | 76 | 23448 | 25.7105263157895 | 0.0382174567965705 | 1 | 1.41773821670447 | <a href="#">PPARA</a>                                                                                   |
| GO:0010888 | <a href="#">negative regulation of lipid storage</a>                                      | Biological process | 1  | 12   | 76 | 23448 | 25.7105263157895 | 0.0382174567965705 | 1 | 1.41773821670447 | <a href="#">PPARA</a>                                                                                   |
| GO:0034260 | <a href="#">negative regulation of GTPase activity</a>                                    | Biological process | 1  | 12   | 76 | 23448 | 25.7105263157895 | 0.0382174567965705 | 1 | 1.41773821670447 | <a href="#">ADCYAP1</a>                                                                                 |
| GO:0043267 | <a href="#">negative regulation of potassium ion transport</a>                            | Biological process | 1  | 12   | 76 | 23448 | 25.7105263157895 | 0.0382174567965705 | 1 | 1.41773821670447 | <a href="#">ADCYAP1</a>                                                                                 |
| GO:0051608 | <a href="#">histamine transport</a>                                                       | Biological process | 1  | 12   | 76 | 23448 | 25.7105263157895 | 0.0382174567965705 | 1 | 1.41773821670447 | <a href="#">ADCYAP1</a>                                                                                 |
| GO:0060123 | <a href="#">regulation of growth hormone secretion</a>                                    | Biological process | 1  | 12   | 76 | 23448 | 25.7105263157895 | 0.0382174567965705 | 1 | 1.41773821670447 | <a href="#">ADCYAP1</a>                                                                                 |
| GO:0061001 | <a href="#">regulation of dendrite spine morphogenesis</a>                                | Biological process | 1  | 12   | 76 | 23448 | 25.7105263157895 | 0.0382174567965705 | 1 | 1.41773821670447 | <a href="#">EFNA1</a>                                                                                   |
| GO:0007276 | <a href="#">gamete generation</a>                                                         | Biological process | 4  | 391  | 76 | 23448 | 3.15627944541661 | 0.0382470983532805 | 1 | 1.41740150735897 | <a href="#">IFT1/DNAI1/PRM2/YBX2</a>                                                                    |
| GO:0010468 | <a href="#">regulation of gene expression</a>                                             | Biological process | 15 | 2859 | 76 | 23448 | 1.6187109957475  | 0.0394406566584796 | 1 | 1.40405586298082 | <a href="#">EFNA1/PPARA/FOXK2/MEIS2/PBX3/POU2F1/RBI2/YBX2/ZFP318/THAP7/ATOH8/TFE3B/LMO2/TGFB2/CDK13</a> |
| GO:0030595 | <a href="#">leukocyte chemotaxis</a>                                                      | Biological process | 2  | 97   | 76 | 23448 | 6.36136733586544 | 0.0396056388884611 | 1 | 1.4022429766048  | <a href="#">CCL12/ITGB2</a>                                                                             |
| GO:0048514 | <a href="#">blood vessel morphogenesis</a>                                                | Biological process | 4  | 396  | 76 | 23448 | 3.11642743221691 | 0.039772691286642  | 1 | 1.40041502074668 | <a href="#">EFNA1/CCL12/CEGAL1/ITGB2</a>                                                                |
| GO:0044275 | <a href="#">cellular carbohydrate catabolic process</a>                                   | Biological process | 2  | 98   | 76 | 23448 | 6.29645542427497 | 0.0403476126859075 | 1 | 1.39418215680336 | <a href="#">HK3/PPARA</a>                                                                               |
| GO:0044282 | <a href="#">small molecule catabolic process</a>                                          | Biological process | 3  | 234  | 76 | 23448 | 3.95546558704453 | 0.0405242831059754 | 1 | 1.39228465928939 | <a href="#">HK3/HFD/PPARA</a>                                                                           |
| GO:0006684 | <a href="#">sphingomyelin metabolic process</a>                                           | Biological process | 1  | 13   | 76 | 23448 | 23.7327935222672 | 0.0413363966021454 | 1 | 1.38366738460307 | <a href="#">SMPD4</a>                                                                                   |
| GO:0007512 | <a href="#">adult heart development</a>                                                   | Biological process | 1  | 13   | 76 | 23448 | 23.7327935222672 | 0.0413363966021454 | 1 | 1.38366738460307 | <a href="#">MYH7</a>                                                                                    |
| GO:0009074 | <a href="#">aromatic amino acid family catabolic process</a>                              | Biological process | 1  | 13   | 76 | 23448 | 23.7327935222672 | 0.0413363966021454 | 1 | 1.38366738460307 | <a href="#">HPD</a>                                                                                     |
| GO:0044065 | <a href="#">regulation of respiratory system process</a>                                  | Biological process | 1  | 13   | 76 | 23448 | 23.7327935222672 | 0.0413363966021454 | 1 | 1.38366738460307 | <a href="#">PBX3</a>                                                                                    |
| GO:0006184 | <a href="#">GTP catabolic process</a>                                                     | Biological process | 4  | 406  | 76 | 23448 | 3.03966813585688 | 0.0429274857437193 | 1 | 1.36726454733713 | <a href="#">TBC1D15/ADCYAP1/SRGAP3/MRAS</a>                                                             |
| GO:0007218 | <a href="#">neuropeptide signaling pathway</a>                                            | Biological process | 2  | 102  | 76 | 23448 | 6.04953560371517 | 0.0433678344500723 | 1 | 1.36283226357558 | <a href="#">ADCYAP1/NPEF</a>                                                                            |
| GO:0009725 | <a href="#">response to hormone stimulus</a>                                              | Biological process | 4  | 409  | 76 | 23448 | 3.01737228155964 | 0.0439008730866716 | 1 | 1.35752684256077 | <a href="#">PPARA/SERPINA31/RCAN1/LMO2</a>                                                              |
| GO:0030252 | <a href="#">growth hormone secretion</a>                                                  | Biological process | 1  | 14   | 76 | 23448 | 22.0375939849624 | 0.0444453547356313 | 1 | 1.35217362317757 | <a href="#">ADCYAP1</a>                                                                                 |
| GO:0031122 | <a href="#">cytoplasmic microtubule organization</a>                                      | Biological process | 1  | 14   | 76 | 23448 | 22.0375939849624 | 0.0444453547356313 | 1 | 1.35217362317757 | <a href="#">HOOK3</a>                                                                                   |
| GO:0035112 | <a href="#">genitalia morphogenesis</a>                                                   | Biological process | 1  | 14   | 76 | 23448 | 22.0375939849624 | 0.0444453547356313 | 1 | 1.35217362317757 | <a href="#">SYCP2</a>                                                                                   |
| GO:0043584 | <a href="#">nose development</a>                                                          | Biological process | 1  | 14   | 76 | 23448 | 22.0375939849624 | 0.0444453547356313 | 1 | 1.35217362317757 | <a href="#">POU2F1</a>                                                                                  |
| GO:0045022 | <a href="#">early endosome to late endosome transport</a>                                 | Biological process | 1  | 14   | 76 | 23448 | 22.0375939849624 | 0.0444453547356313 | 1 | 1.35217362317757 | <a href="#">HOOK3</a>                                                                                   |

|            |                                                                           |                    |   |     |    |       |                  |                    |   |                  |                                                |
|------------|---------------------------------------------------------------------------|--------------------|---|-----|----|-------|------------------|--------------------|---|------------------|------------------------------------------------|
| GO:0060251 | <a href="#">regulation of glial cell proliferation</a>                    | Biological process | 1 | 14  | 76 | 23448 | 22.0375939849624 | 0.0444453547356313 | 1 | 1.35217362317757 | <a href="#">ADCYAP1</a>                        |
| GO:0046039 | <a href="#">GTP metabolic process</a>                                     | Biological process | 4 | 414 | 76 | 23448 | 2.98093058733791 | 0.0455508210984407 | 1 | 1.34150379003439 | <a href="#">MRAS//TBC1D15//ADCYAP1//SRGAP3</a> |
| GO:0002548 | <a href="#">monocyte chemotaxis</a>                                       | Biological process | 1 | 15  | 76 | 23448 | 20.5684210526316 | 0.0475443627172003 | 1 | 1.32290096949312 | <a href="#">CCL12</a>                          |
| GO:0010869 | <a href="#">regulation of receptor biosynthetic process</a>               | Biological process | 1 | 15  | 76 | 23448 | 20.5684210526316 | 0.0475443627172003 | 1 | 1.32290096949312 | <a href="#">PPARA</a>                          |
| GO:0043043 | <a href="#">peptide biosynthetic process</a>                              | Biological process | 1 | 15  | 76 | 23448 | 20.5684210526316 | 0.0475443627172003 | 1 | 1.32290096949312 | <a href="#">GGT5</a>                           |
| GO:2000677 | <a href="#">regulation of transcription regulatory region DNA binding</a> | Biological process | 1 | 15  | 76 | 23448 | 20.5684210526316 | 0.0475443627172003 | 1 | 1.32290096949312 | <a href="#">PPARA</a>                          |
| GO:0003015 | <a href="#">heart process</a>                                             | Biological process | 2 | 109 | 76 | 23448 | 5.66103331723805 | 0.048848462508365  | 1 | 1.31114910102691 | <a href="#">MYH7//NPF</a>                      |
| GO:0060047 | <a href="#">heart contraction</a>                                         | Biological process | 2 | 109 | 76 | 23448 | 5.66103331723805 | 0.048848462508365  | 1 | 1.31114910102691 | <a href="#">MYH7//NPF</a>                      |
| GO:0090276 | <a href="#">regulation of peptide hormone secretion</a>                   | Biological process | 2 | 110 | 76 | 23448 | 5.60956937799043 | 0.0496510585097658 | 1 | 1.30407148835591 | <a href="#">NPF//ADCYAP1</a>                   |
