# Supplementary material
Source: PubMed Central journal article supplement (PMC4556938)
Supplement: Table_S6.pdf [file Table_S6.pdf]

**Supplementary Table 6. Biological process analysis of differentially downregulated genes.**

| GO.ID      | Term                                                                                            | Ontology           | Count | Pop.Hits | List.Total | Pop.Total | Fold.Enrichment  | Pvalue               | FDR | Enrichment.Score | GENES                                                                                                                                                                                                                                                                                                                                                                                                                                                                                                                                                                                                                                                                                                                                                                                                                                                                                                                                                                                                                                                                                                                                                                                                                                                                                                                                                                                                                                                                                                                                                                                                                                                                                                                                                                                                                                                                                                                           |
|------------|-------------------------------------------------------------------------------------------------|--------------------|-------|----------|------------|-----------|------------------|----------------------|-----|------------------|---------------------------------------------------------------------------------------------------------------------------------------------------------------------------------------------------------------------------------------------------------------------------------------------------------------------------------------------------------------------------------------------------------------------------------------------------------------------------------------------------------------------------------------------------------------------------------------------------------------------------------------------------------------------------------------------------------------------------------------------------------------------------------------------------------------------------------------------------------------------------------------------------------------------------------------------------------------------------------------------------------------------------------------------------------------------------------------------------------------------------------------------------------------------------------------------------------------------------------------------------------------------------------------------------------------------------------------------------------------------------------------------------------------------------------------------------------------------------------------------------------------------------------------------------------------------------------------------------------------------------------------------------------------------------------------------------------------------------------------------------------------------------------------------------------------------------------------------------------------------------------------------------------------------------------|
| GO:0044238 | <a href="#">primary metabolic process</a>                                                       | Biological process | 75    | 7712     | 168        | 23448     | 1.3573466212211  | 0.000948705527999735 | 1   | 3.02286856882715 | <a href="#">HHEX</a> / <a href="#">SIX1</a> / <a href="#">TCF25</a> / <a href="#">FOXO6</a> / <a href="#">PDE6H</a> / <a href="#">TERF2</a> / <a href="#">NKX3-1</a> / <a href="#">HIST3H2A</a> / <a href="#">CIRA</a> / <a href="#">RNF220</a> / <a href="#">MIB2</a> / <a href="#">BAG1L2</a> / <a href="#">CHST2</a> / <a href="#">CHST1</a> / <a href="#">GALK1</a> / <a href="#">ACPP</a> / <a href="#">NME5</a> / <a href="#">RASL12</a> / <a href="#">TUBG2</a> / <a href="#">ATP7B</a> / <a href="#">KATNAL2</a> / <a href="#">MBD4</a> / <a href="#">TTC5</a> / <a href="#">A73001</a> / <a href="#">LOIRIK</a> / <a href="#">HMG1</a> / <a href="#">RUNX1T1</a> / <a href="#">FOXO6</a> / <a href="#">PIAS2</a> / <a href="#">PITX1</a> / <a href="#">REX2</a> / <a href="#">ZBTB1</a> / <a href="#">ZEP2</a> / <a href="#">ZFP62</a> / <a href="#">HEYL</a> / <a href="#">CEAL3</a> / <a href="#">SEC14L2</a> / <a href="#">SMARCC2</a> / <a href="#">CASZ1</a> / <a href="#">ZFP618</a> / <a href="#">MKL1</a> / <a href="#">CEAL5</a> / <a href="#">LSM6</a> / <a href="#">SREK1P1</a> / <a href="#">ESRP2</a> / <a href="#">PCSK5</a> / <a href="#">LATS1</a> / <a href="#">LATS2</a> / <a href="#">STK35</a> / <a href="#">DYRK2</a> / <a href="#">ACVR1C</a> / <a href="#">IP6K3</a> / <a href="#">PDP1</a> / <a href="#">ADAM23</a> / <a href="#">TRFR2</a> / <a href="#">CAPN9</a> / <a href="#">PRSS23</a> / <a href="#">BCO3</a> / <a href="#">I665</a> / <a href="#">PRSS48</a> / <a href="#">TPH2</a> / <a href="#">MGLL</a> / <a href="#">SERINC5</a> / <a href="#">LIPH</a> / <a href="#">AGPAT1</a> / <a href="#">ALOX8</a> / <a href="#">GALR2</a> / <a href="#">PRDX6</a> / <a href="#">ABAT</a> / <a href="#">CDA</a> / <a href="#">CIRBP</a> / <a href="#">CHDH</a> / <a href="#">ITGB1BP3</a> / <a href="#">SERPINB7</a> / <a href="#">ADRA2C</a> / <a href="#">CCL24</a> / <a href="#">MAGI3</a> |
| GO:0030521 | <a href="#">androgen receptor signaling pathway</a>                                             | Biological process | 3     | 35       | 168        | 23448     | 11.9632653061224 | 0.001998035880065    | 1   | 2.69939671712389 | <a href="#">PIAS2</a> / <a href="#">HEYL</a> / <a href="#">NKX3-1</a>                                                                                                                                                                                                                                                                                                                                                                                                                                                                                                                                                                                                                                                                                                                                                                                                                                                                                                                                                                                                                                                                                                                                                                                                                                                                                                                                                                                                                                                                                                                                                                                                                                                                                                                                                                                                                                                           |
| GO:0060766 | <a href="#">negative regulation of androgen receptor signaling pathway</a>                      | Biological process | 2     | 10       | 168        | 23448     | 27.9142857142857 | 0.00221125885371372  | 1   | 2.65536041519638 | <a href="#">PIAS2</a> / <a href="#">HEYL</a>                                                                                                                                                                                                                                                                                                                                                                                                                                                                                                                                                                                                                                                                                                                                                                                                                                                                                                                                                                                                                                                                                                                                                                                                                                                                                                                                                                                                                                                                                                                                                                                                                                                                                                                                                                                                                                                                                    |
| GO:0048518 | <a href="#">positive regulation of bioleical process</a>                                        | Biological process | 34    | 3029     | 168        | 23448     | 1.56666509456209 | 0.00495129307169558  | 1   | 2.30528136660868 | <a href="#">SIX1</a> / <a href="#">AGPAT1</a> / <a href="#">NKX3-1</a> / <a href="#">CCL24</a> / <a href="#">ADRA2C</a> / <a href="#">CIRA</a> / <a href="#">GALR2</a> / <a href="#">MBD4</a> / <a href="#">EMID2</a> / <a href="#">ECM2</a> / <a href="#">GRIN2B</a> / <a href="#">STMN2</a> / <a href="#">CIRBP</a> / <a href="#">HMG1</a> / <a href="#">PIAS2</a> / <a href="#">ZBTB17</a> / <a href="#">SMARCC2</a> / <a href="#">MKL1</a> / <a href="#">HHEX</a> / <a href="#">KCP</a> / <a href="#">COLPH3</a> / <a href="#">TERF2</a> / <a href="#">LATS1</a> / <a href="#">ADRA2C</a> / <a href="#">DYRK2</a> / <a href="#">ACVR1C</a> / <a href="#">MIB2</a> / <a href="#">SEC14L2</a> / <a href="#">HEYL</a> / <a href="#">PDE6H</a> / <a href="#">ISLR2</a> / <a href="#">PITX1</a> / <a href="#">FOXO6</a> / <a href="#">UBASH3A</a>                                                                                                                                                                                                                                                                                                                                                                                                                                                                                                                                                                                                                                                                                                                                                                                                                                                                                                                                                                                                                                                                                |
| GO:0006825 | <a href="#">copper ion transport</a>                                                            | Biological process | 2     | 16       | 168        | 23448     | 17.4464285714286 | 0.00573261788449944  | 1   | 2.24164700575438 | <a href="#">ATP7B</a> / <a href="#">HEPH</a>                                                                                                                                                                                                                                                                                                                                                                                                                                                                                                                                                                                                                                                                                                                                                                                                                                                                                                                                                                                                                                                                                                                                                                                                                                                                                                                                                                                                                                                                                                                                                                                                                                                                                                                                                                                                                                                                                    |
| GO:0060765 | <a href="#">regulation of androgen receptor signaling pathway</a>                               | Biological process | 2     | 16       | 168        | 23448     | 17.4464285714286 | 0.00573261788449944  | 1   | 2.24164700575438 | <a href="#">PIAS2</a> / <a href="#">HEYL</a>                                                                                                                                                                                                                                                                                                                                                                                                                                                                                                                                                                                                                                                                                                                                                                                                                                                                                                                                                                                                                                                                                                                                                                                                                                                                                                                                                                                                                                                                                                                                                                                                                                                                                                                                                                                                                                                                                    |
| GO:0051145 | <a href="#">smooth muscle cell differentiation</a>                                              | Biological process | 3     | 53       | 168        | 23448     | 7.90026954177897 | 0.00650988712365872  | 1   | 2.18642654169251 | <a href="#">FOXO6</a> / <a href="#">SIX1</a> / <a href="#">MKL1</a>                                                                                                                                                                                                                                                                                                                                                                                                                                                                                                                                                                                                                                                                                                                                                                                                                                                                                                                                                                                                                                                                                                                                                                                                                                                                                                                                                                                                                                                                                                                                                                                                                                                                                                                                                                                                                                                             |
| GO:0034621 | <a href="#">cellular macromolecular complex subunit organization</a>                            | Biological process | 9     | 466      | 168        | 23448     | 2.69558553034948 | 0.00659295791554832  | 1   | 2.18091969645461 | <a href="#">HIST3H2A</a> / <a href="#">SMARCC2</a> / <a href="#">STMN2</a> / <a href="#">ACVR1C</a> / <a href="#">LATS1</a> / <a href="#">LMA1</a> / <a href="#">CCL24</a> / <a href="#">CIRBP</a> / <a href="#">TUBG2</a>                                                                                                                                                                                                                                                                                                                                                                                                                                                                                                                                                                                                                                                                                                                                                                                                                                                                                                                                                                                                                                                                                                                                                                                                                                                                                                                                                                                                                                                                                                                                                                                                                                                                                                      |
| GO:0045736 | <a href="#">negative regulation of cyclin-dependent protein kinase activity</a>                 | Biological process | 2     | 18       | 168        | 23448     | 15.5079365079365 | 0.00724081474869849  | 1   | 2.1402125635051  | <a href="#">LATS1</a> / <a href="#">LATS2</a>                                                                                                                                                                                                                                                                                                                                                                                                                                                                                                                                                                                                                                                                                                                                                                                                                                                                                                                                                                                                                                                                                                                                                                                                                                                                                                                                                                                                                                                                                                                                                                                                                                                                                                                                                                                                                                                                                   |
| GO:0045742 | <a href="#">positive regulation of epidermal growth factor receptor signaling pathway</a>       | Biological process | 2     | 18       | 168        | 23448     | 15.5079365079365 | 0.00724081474869849  | 1   | 2.1402125635051  | <a href="#">ADRA2C</a> / <a href="#">PDE6H</a>                                                                                                                                                                                                                                                                                                                                                                                                                                                                                                                                                                                                                                                                                                                                                                                                                                                                                                                                                                                                                                                                                                                                                                                                                                                                                                                                                                                                                                                                                                                                                                                                                                                                                                                                                                                                                                                                                  |
| GO:0001964 | <a href="#">startle response</a>                                                                | Biological process | 2     | 19       | 168        | 23448     | 14.6917293233083 | 0.00805482309558691  | 1   | 2.09394399335204 | <a href="#">CTNNA2</a> / <a href="#">GRIN2B</a>                                                                                                                                                                                                                                                                                                                                                                                                                                                                                                                                                                                                                                                                                                                                                                                                                                                                                                                                                                                                                                                                                                                                                                                                                                                                                                                                                                                                                                                                                                                                                                                                                                                                                                                                                                                                                                                                                 |
| GO:0030878 | <a href="#">thyroid gland development</a>                                                       | Biological process | 2     | 19       | 168        | 23448     | 14.6917293233083 | 0.00805482309558691  | 1   | 2.09394399335204 | <a href="#">HHEX</a> / <a href="#">SIX1</a>                                                                                                                                                                                                                                                                                                                                                                                                                                                                                                                                                                                                                                                                                                                                                                                                                                                                                                                                                                                                                                                                                                                                                                                                                                                                                                                                                                                                                                                                                                                                                                                                                                                                                                                                                                                                                                                                                     |
| GO:0033144 | <a href="#">negative regulation of intracellular steroid hormone receptor signaling pathway</a> | Biological process | 2     | 19       | 168        | 23448     | 14.6917293233083 | 0.00805482309558691  | 1   | 2.09394399335204 | <a href="#">PIAS2</a> / <a href="#">HEYL</a>                                                                                                                                                                                                                                                                                                                                                                                                                                                                                                                                                                                                                                                                                                                                                                                                                                                                                                                                                                                                                                                                                                                                                                                                                                                                                                                                                                                                                                                                                                                                                                                                                                                                                                                                                                                                                                                                                    |
| GO:0035329 | <a href="#">hippo signaling cascade</a>                                                         | Biological process | 2     | 19       | 168        | 23448     | 14.6917293233083 | 0.00805482309558691  | 1   | 2.09394399335204 | <a href="#">LATS1</a> / <a href="#">LATS2</a>                                                                                                                                                                                                                                                                                                                                                                                                                                                                                                                                                                                                                                                                                                                                                                                                                                                                                                                                                                                                                                                                                                                                                                                                                                                                                                                                                                                                                                                                                                                                                                                                                                                                                                                                                                                                                                                                                   |
| GO:0035094 | <a href="#">response to nicotine</a>                                                            | Biological process | 2     | 20       | 168        | 23448     | 13.9571428571429 | 0.00890796627355639  | 1   | 2.05022143591686 | <a href="#">CHRNB4</a> / <a href="#">ABAT</a>                                                                                                                                                                                                                                                                                                                                                                                                                                                                                                                                                                                                                                                                                                                                                                                                                                                                                                                                                                                                                                                                                                                                                                                                                                                                                                                                                                                                                                                                                                                                                                                                                                                                                                                                                                                                                                                                                   |
| GO:0009119 | <a href="#">ribonucleoside metabolic process</a>                                                | Biological process | 3     | 64       | 168        | 23448     | 6.54241071428571 | 0.0109349660656814   | 1   | 1.9611825603639  | <a href="#">NME5</a> / <a href="#">CDA</a> / <a href="#">ACPP</a>                                                                                                                                                                                                                                                                                                                                                                                                                                                                                                                                                                                                                                                                                                                                                                                                                                                                                                                                                                                                                                                                                                                                                                                                                                                                                                                                                                                                                                                                                                                                                                                                                                                                                                                                                                                                                                                               |

|            |                                                                          |                    |    |      |     |       |                  |                    |   |                  |                                                                                                                                                                                                                                                                                                                                                                                                                                                                                                                                                                                                                                                                                                                                         |
|------------|--------------------------------------------------------------------------|--------------------|----|------|-----|-------|------------------|--------------------|---|------------------|-----------------------------------------------------------------------------------------------------------------------------------------------------------------------------------------------------------------------------------------------------------------------------------------------------------------------------------------------------------------------------------------------------------------------------------------------------------------------------------------------------------------------------------------------------------------------------------------------------------------------------------------------------------------------------------------------------------------------------------------|
| GO:0046131 | <a href="#">pyrimidine ribonucleoside metabolic process</a>              | Biological process | 2  | 23   | 168 | 23448 | 12.1366459627329 | 0.0116962799805782 | 1 | 1.93195224430509 | NMES/CDA                                                                                                                                                                                                                                                                                                                                                                                                                                                                                                                                                                                                                                                                                                                                |
| GO:0048522 | <a href="#">positive regulation of cellular process</a>                  | Biological process | 30 | 2753 | 168 | 23448 | 1.52093819729127 | 0.0125323737851017 | 1 | 1.90196666051981 | NKX3-1/CCL24<br>//ADORA3/GALR2<br>//MBD4/EMID2<br>//ECM2/GRIN2B<br>//STMN2/CIRBP<br>//HMG1/PIAS2<br>//SIX1/ZBTB17<br>//SMARCC2/MKLL1<br>//HHEX<br>//KCP/GOLPH3<br>//TERF2/LATS1<br>//ADRA2C/DYRK2<br>//ACVR1C/MIB2<br>//HEY1/PDE6H<br>//ISLR2/PITX1<br>//FOXO6                                                                                                                                                                                                                                                                                                                                                                                                                                                                          |
| GO:0008152 | <a href="#">metabolic process</a>                                        | Biological process | 81 | 9272 | 168 | 23448 | 1.21929310982374 | 0.0135170839666472 | 1 | 1.86911698840815 | HHEX/SIX1/TCF25<br>//FOXO6/PDE6H<br>//TERF2/CHST2<br>//CHST1/FAM109B<br>//NKX3-1/HIST3H2A<br>//CIRB2/RNF230<br>//MIB2/B4GALT2<br>//GALK1/CHDH<br>//ALOX8/PRDX6<br>//HEPH1/PH2/ACPP<br>//NMES/BASL12<br>//TUBG2/ATP7B<br>//KATNAL2/MBD4<br>//TTC5<br>//A73001LO1RIK<br>//HMG1/RUNX1T1<br>//HOXB6/PIAS2<br>//PITX1/REF2<br>//ZBTB17/ZFP2<br>//ZFP62/HEY1<br>//TCFAL3/SEC14L2<br>//SMARCC2/CASZ1<br>//ZFP618/MKLL1<br>//TCFAL3/SM6<br>//SREK1P/ESRP2<br>//PCSK5/LATS1<br>//LATS2/STK35<br>//DYRK2/ACVR1C<br>//IP6K3/PDPI<br>//ADAM23/TRFR2<br>//CAPN9/PRSS23<br>//BCD51665/PRSS48<br>//MGL1/SERINC5<br>//LPH/AGPAT1<br>//GALR2/ABAT<br>//CDA/SERPINB7<br>//CIRBP/TGFB1BP3<br>//MAGI5/ADRA2C<br>//CCL24/SLC16A9<br>//KIF9/NAGPA<br>//NTSDC3 |
| GO:0048854 | <a href="#">brain morphogenesis</a>                                      | Biological process | 2  | 25   | 168 | 23448 | 11.1657142857143 | 0.0137400793902946 | 1 | 1.86201075791204 | HHEX/CTNNA2                                                                                                                                                                                                                                                                                                                                                                                                                                                                                                                                                                                                                                                                                                                             |
| GO:0006213 | <a href="#">pyrimidine nucleoside metabolic process</a>                  | Biological process | 2  | 27   | 168 | 23448 | 10.3386243386243 | 0.0159265090579427 | 1 | 1.79787940706247 | NMES/CDA                                                                                                                                                                                                                                                                                                                                                                                                                                                                                                                                                                                                                                                                                                                                |
| GO:0006284 | <a href="#">base-excision repair</a>                                     | Biological process | 2  | 27   | 168 | 23448 | 10.3386243386243 | 0.0159265090579427 | 1 | 1.79787940706247 | HMG1/MBD4                                                                                                                                                                                                                                                                                                                                                                                                                                                                                                                                                                                                                                                                                                                               |
| GO:0009755 | <a href="#">hormone-mediated signaling pathway</a>                       | Biological process | 3  | 74   | 168 | 23448 | 5.65830115830116 | 0.0161552604266273 | 1 | 1.79168603665992 | NKX3-1/LATS1<br>//LATS2                                                                                                                                                                                                                                                                                                                                                                                                                                                                                                                                                                                                                                                                                                                 |
| GO:0030518 | <a href="#">intracellular steroid hormone receptor signaling pathway</a> | Biological process | 3  | 74   | 168 | 23448 | 5.65830115830116 | 0.0161552604266273 | 1 | 1.79168603665992 | PIAS2/NKX3-1<br>//HEY1                                                                                                                                                                                                                                                                                                                                                                                                                                                                                                                                                                                                                                                                                                                  |
| GO:0051258 | <a href="#">protein polymerization</a>                                   | Biological process | 4  | 136  | 168 | 23448 | 4.10504201680672 | 0.016699833006755  | 1 | 1.77728787164328 | LATS1/CCL24<br>//STMN2/TUBG2                                                                                                                                                                                                                                                                                                                                                                                                                                                                                                                                                                                                                                                                                                            |
| GO:0006974 | <a href="#">response to DNA damage stimulus</a>                          | Biological process | 8  | 454  | 168 | 23448 | 2.45940843297671 | 0.0168938865089032 | 1 | 1.77227042768165 | MBD4/TTC5<br>//A73001LO1RIK<br>//HMG1/TERF2<br>//DYRK2/NKX3-1<br>//FOXO6                                                                                                                                                                                                                                                                                                                                                                                                                                                                                                                                                                                                                                                                |
| GO:0071844 | <a href="#">cellular component assembly at cellular level</a>            | Biological process | 12 | 832  | 168 | 23448 | 2.01304945054945 | 0.0169282362870275 | 1 | 1.77138828765082 | ZBP2/HIST3H2A<br>//LIMA1/ACVR1C<br>//LATS1/CCL24<br>//STMN2/PRDX6<br>//CIRBP/HMG1<br>//BAIAP2L2/TUBG2                                                                                                                                                                                                                                                                                                                                                                                                                                                                                                                                                                                                                                   |
| GO:0051148 | <a href="#">negative regulation of muscle cell differentiation</a>       | Biological process | 2  | 28   | 168 | 23448 | 9.96938775510204 | 0.0170718191011888 | 1 | 1.76772019982751 | TGFB1BP3/FOXO6                                                                                                                                                                                                                                                                                                                                                                                                                                                                                                                                                                                                                                                                                                                          |
| GO:0009116 | <a href="#">nucleoside metabolic process</a>                             | Biological process | 3  | 77   | 168 | 23448 | 5.4378478664193  | 0.0179500136710618 | 1 | 1.74593521631884 | NMES/CDA//ACPP                                                                                                                                                                                                                                                                                                                                                                                                                                                                                                                                                                                                                                                                                                                          |
| GO:0006950 | <a href="#">response to stress</a>                                       | Biological process | 22 | 1913 | 168 | 23448 | 1.60510790829662 | 0.0184718239949093 | 1 | 1.73349021815952 | PRDX6/NMES<br>//GRIN2B/ABAT<br>//ADORA3/IFNE<br>//MBD4/TTC5<br>//A73001LO1RIK<br>//HMG1/CHST2<br>//CCL24/CHST1<br>//FOXO6/TERF2<br>//ARPP21/DYRK2                                                                                                                                                                                                                                                                                                                                                                                                                                                                                                                                                                                       |



|            |                                                                                              |                    |    |      |     |       |                  |                    |   |                  |                                                                                                                                                                                                                                                                                                                                                                                                                                                                                                                                                                                                                                                                                                                                                                                                                                                                                                                                                                                                                                                                                                                                                                                                                                                                                                                                                                                                                                                                                                                                                                                                                                                                                                                                                                      |
|------------|----------------------------------------------------------------------------------------------|--------------------|----|------|-----|-------|------------------|--------------------|---|------------------|----------------------------------------------------------------------------------------------------------------------------------------------------------------------------------------------------------------------------------------------------------------------------------------------------------------------------------------------------------------------------------------------------------------------------------------------------------------------------------------------------------------------------------------------------------------------------------------------------------------------------------------------------------------------------------------------------------------------------------------------------------------------------------------------------------------------------------------------------------------------------------------------------------------------------------------------------------------------------------------------------------------------------------------------------------------------------------------------------------------------------------------------------------------------------------------------------------------------------------------------------------------------------------------------------------------------------------------------------------------------------------------------------------------------------------------------------------------------------------------------------------------------------------------------------------------------------------------------------------------------------------------------------------------------------------------------------------------------------------------------------------------------|
| GO:0044237 | <a href="#">cellular metabolic process</a>                                                   | Biological process | 67 | 7615 | 168 | 23448 | 1.22800862958447 | 0.025549489760667  | 1 | 1.59261776857582 | <a href="#">HHEX</a> / <a href="#">SIX1</a> / <a href="#">TCF25</a><br><a href="#">FOXO6</a> / <a href="#">PDE6H</a><br><a href="#">TERF2</a> / <a href="#">CHST2</a><br><a href="#">CHST1</a> / <a href="#">FAM109B</a><br><a href="#">NKX3-1</a> / <a href="#">HIST3H2A</a><br><a href="#">RNF220</a> / <a href="#">MIB2</a><br><a href="#">GALX1</a> / <a href="#">ACPP</a><br><a href="#">NME5</a> / <a href="#">RASL12</a><br><a href="#">TUBG2</a> / <a href="#">ATP7B</a><br><a href="#">KATNAL2</a> / <a href="#">MBD4</a><br><a href="#">TTC5</a><br><a href="#">A73001101RIK</a><br><a href="#">HMG1</a> / <a href="#">RUNX1T1</a><br><a href="#">HOXB6</a> / <a href="#">PIAS2</a><br><a href="#">PTX1</a> / <a href="#">RFX2</a><br><a href="#">ZFP2</a> / <a href="#">HEYL</a><br><a href="#">ZBTB17</a> / <a href="#">ZFP2</a><br><a href="#">ZFP2</a> / <a href="#">HEYL</a><br><a href="#">TCEAL3</a> / <a href="#">SEC14L2</a><br><a href="#">SMARCC2</a> / <a href="#">CASZ1</a><br><a href="#">ZFP618</a> / <a href="#">MKL1</a><br><a href="#">TCEAL3</a> / <a href="#">LSM6</a><br><a href="#">SREK1P1</a> / <a href="#">ESRP2</a><br><a href="#">PCSK5</a> / <a href="#">LATS1</a><br><a href="#">LATS2</a> / <a href="#">STK35</a><br><a href="#">DYRK2</a> / <a href="#">ACVR1C</a><br><a href="#">IPK3</a> / <a href="#">PDL1</a> / <a href="#">TPH2</a><br><a href="#">MGL1</a> / <a href="#">AGPAT1</a><br><a href="#">SERINC5</a> / <a href="#">ALOX8</a><br><a href="#">GALR2</a> / <a href="#">PRDX6</a><br><a href="#">ABAT</a> / <a href="#">CDA</a> / <a href="#">CIRBP</a><br><a href="#">ITGB1BP3</a> / <a href="#">MAGI3</a><br><a href="#">CHDH</a> / <a href="#">ADRA2C</a><br><a href="#">CCL24</a> / <a href="#">SLC16A9</a> |
| GO:0030182 | <a href="#">neuron differentiation</a>                                                       | Biological process | 11 | 785  | 168 | 23448 | 1.9557779799818  | 0.0262032672202246 | 1 | 1.58164455420509 | <a href="#">CTNNA2</a> / <a href="#">STMN2</a><br><a href="#">GALR2</a> / <a href="#">EFHD1</a><br><a href="#">SIX1</a> / <a href="#">ADRA2C</a><br><a href="#">HEYL</a> / <a href="#">ISLR2</a> / <a href="#">PIAS2</a><br><a href="#">WHRN</a> / <a href="#">PROM1</a>                                                                                                                                                                                                                                                                                                                                                                                                                                                                                                                                                                                                                                                                                                                                                                                                                                                                                                                                                                                                                                                                                                                                                                                                                                                                                                                                                                                                                                                                                             |
| GO:007267  | <a href="#">cell-cell signaling</a>                                                          | Biological process | 10 | 687  | 168 | 23448 | 2.03160740278644 | 0.0265815108982639 | 1 | 1.57542033730864 | <a href="#">SIX1</a> / <a href="#">ADORA3</a><br><a href="#">GALR2</a> / <a href="#">GRIN2B</a><br><a href="#">ABAT</a> / <a href="#">ACVR1C</a><br><a href="#">CTNNA2</a> / <a href="#">CHRNB4</a><br><a href="#">MGL1</a> / <a href="#">NKX3-1</a>                                                                                                                                                                                                                                                                                                                                                                                                                                                                                                                                                                                                                                                                                                                                                                                                                                                                                                                                                                                                                                                                                                                                                                                                                                                                                                                                                                                                                                                                                                                 |
| GO:0030154 | <a href="#">cell differentiation</a>                                                         | Biological process | 25 | 2336 | 168 | 23448 | 1.49370107632094 | 0.0272166096799688 | 1 | 1.56516597498075 | <a href="#">HHEX</a> / <a href="#">ZBP2</a> / <a href="#">SIX1</a><br><a href="#">HEYL</a> / <a href="#">NME5</a><br><a href="#">CTNNA2</a> / <a href="#">STMN2</a><br><a href="#">LATS1</a> / <a href="#">LATS2</a><br><a href="#">HEPH</a> / <a href="#">GALR2</a><br><a href="#">EFHD1</a> / <a href="#">RUNX1T1</a><br><a href="#">ITGB1BP3</a> / <a href="#">ADRA2C</a><br><a href="#">PIAS2</a> / <a href="#">ISLR2</a> / <a href="#">BESP1</a><br><a href="#">PTX1</a> / <a href="#">MKL1</a><br><a href="#">FOXO6</a> / <a href="#">WHRN</a><br><a href="#">PROM1</a> / <a href="#">ACVR1C</a><br><a href="#">EGFL7</a>                                                                                                                                                                                                                                                                                                                                                                                                                                                                                                                                                                                                                                                                                                                                                                                                                                                                                                                                                                                                                                                                                                                                      |
| GO:0014068 | <a href="#">positive regulation of phosphatidylinositol 3-kinase cascade</a>                 | Biological process | 2  | 36   | 168 | 23448 | 7.75396825396825 | 0.0274136973027933 | 1 | 1.56203238693719 | <a href="#">ADORA3</a> / <a href="#">NKX3-1</a>                                                                                                                                                                                                                                                                                                                                                                                                                                                                                                                                                                                                                                                                                                                                                                                                                                                                                                                                                                                                                                                                                                                                                                                                                                                                                                                                                                                                                                                                                                                                                                                                                                                                                                                      |
| GO:0034623 | <a href="#">cellular macromolecular complex disassembly</a>                                  | Biological process | 3  | 91   | 168 | 23448 | 4.60125588697017 | 0.0277379884371028 | 1 | 1.55692503721885 | <a href="#">SMARCC2</a> / <a href="#">STMN2</a><br><a href="#">LIMA1</a>                                                                                                                                                                                                                                                                                                                                                                                                                                                                                                                                                                                                                                                                                                                                                                                                                                                                                                                                                                                                                                                                                                                                                                                                                                                                                                                                                                                                                                                                                                                                                                                                                                                                                             |
| GO:0009891 | <a href="#">positive regulation of biosynthetic process</a>                                  | Biological process | 15 | 1217 | 168 | 23448 | 1.72027233243338 | 0.0288113956438605 | 1 | 1.54043570368603 | <a href="#">GALR2</a> / <a href="#">CIRBP</a><br><a href="#">HMG1</a> / <a href="#">PIAS2</a><br><a href="#">NKX3-1</a> / <a href="#">SIX1</a><br><a href="#">ZBTB17</a> / <a href="#">SMARCC2</a><br><a href="#">MKL1</a> / <a href="#">SEC14L2</a><br><a href="#">DYRK2</a> / <a href="#">HHEX</a><br><a href="#">PTX1</a> / <a href="#">HEYL</a><br><a href="#">FOXO6</a>                                                                                                                                                                                                                                                                                                                                                                                                                                                                                                                                                                                                                                                                                                                                                                                                                                                                                                                                                                                                                                                                                                                                                                                                                                                                                                                                                                                         |
| GO:0042058 | <a href="#">regulation of epidermal growth factor receptor signaling pathway</a>             | Biological process | 2  | 37   | 168 | 23448 | 7.54440154440154 | 0.0288460634080254 | 1 | 1.5399134461763  | <a href="#">ADRA2C</a> / <a href="#">PDE6H</a>                                                                                                                                                                                                                                                                                                                                                                                                                                                                                                                                                                                                                                                                                                                                                                                                                                                                                                                                                                                                                                                                                                                                                                                                                                                                                                                                                                                                                                                                                                                                                                                                                                                                                                                       |
| GO:0045445 | <a href="#">myoblast differentiation</a>                                                     | Biological process | 2  | 37   | 168 | 23448 | 7.54440154440154 | 0.0288460634080254 | 1 | 1.5399134461763  | <a href="#">ITGB1BP3</a> / <a href="#">PTX1</a>                                                                                                                                                                                                                                                                                                                                                                                                                                                                                                                                                                                                                                                                                                                                                                                                                                                                                                                                                                                                                                                                                                                                                                                                                                                                                                                                                                                                                                                                                                                                                                                                                                                                                                                      |
| GO:0009966 | <a href="#">regulation of signal transduction</a>                                            | Biological process | 17 | 1443 | 168 | 23448 | 1.64429264429264 | 0.03007060545502   | 1 | 1.5218578275321  | <a href="#">PDE6H</a> / <a href="#">ADORA3</a><br><a href="#">NKX3-1</a> / <a href="#">HHEX</a><br><a href="#">KCP</a> / <a href="#">GOLPH3</a><br><a href="#">CCL24</a> / <a href="#">ADRA2C</a><br><a href="#">MIB2</a> / <a href="#">GRIN2B</a><br><a href="#">MAGI3</a> / <a href="#">UBASH3A</a><br><a href="#">PIAS2</a> / <a href="#">HEYL</a> / <a href="#">LATS1</a><br><a href="#">LATS2</a> / <a href="#">MGL1</a>                                                                                                                                                                                                                                                                                                                                                                                                                                                                                                                                                                                                                                                                                                                                                                                                                                                                                                                                                                                                                                                                                                                                                                                                                                                                                                                                        |
| GO:0008630 | <a href="#">DNA damage response, signal transduction resulting in induction of apoptosis</a> | Biological process | 2  | 38   | 168 | 23448 | 7.34586466165413 | 0.030307788816352  | 1 | 1.51844588992056 | <a href="#">DYRK2</a> / <a href="#">MBD4</a>                                                                                                                                                                                                                                                                                                                                                                                                                                                                                                                                                                                                                                                                                                                                                                                                                                                                                                                                                                                                                                                                                                                                                                                                                                                                                                                                                                                                                                                                                                                                                                                                                                                                                                                         |
| GO:0048869 | <a href="#">cellular developmental process</a>                                               | Biological process | 26 | 2484 | 168 | 23448 | 1.46089256958822 | 0.0311322810951932 | 1 | 1.5067890569352  | <a href="#">HHEX</a> / <a href="#">ZBP2</a> / <a href="#">SIX1</a><br><a href="#">HEYL</a> / <a href="#">NME5</a><br><a href="#">CTNNA2</a> / <a href="#">CCL24</a><br><a href="#">STMN2</a> / <a href="#">ACVR1C</a><br><a href="#">EGFL7</a> / <a href="#">LATS1</a><br><a href="#">LATS2</a> / <a href="#">HEPH</a><br><a href="#">GALR2</a> / <a href="#">EFHD1</a><br><a href="#">RUNX1T1</a><br><a href="#">ITGB1BP3</a> / <a href="#">ADRA2C</a><br><a href="#">PIAS2</a> / <a href="#">ISLR2</a> / <a href="#">BESP1</a>                                                                                                                                                                                                                                                                                                                                                                                                                                                                                                                                                                                                                                                                                                                                                                                                                                                                                                                                                                                                                                                                                                                                                                                                                                     |





|            |                                                                           |                    |    |      |     |       |                  |                    |   |                  |  |                                                                                                                                                                                                                                                                                                                                                                                                                                                                                             |
|------------|---------------------------------------------------------------------------|--------------------|----|------|-----|-------|------------------|--------------------|---|------------------|--|---------------------------------------------------------------------------------------------------------------------------------------------------------------------------------------------------------------------------------------------------------------------------------------------------------------------------------------------------------------------------------------------------------------------------------------------------------------------------------------------|
|            |                                                                           |                    |    |      |     |       |                  |                    |   |                  |  | <a href="#">//ZFP62//HEYL</a><br><a href="#">//TCEAL8//SEC14L2</a><br><a href="#">//SMARCC2//CASZ1</a><br><a href="#">//ZFP618//MKL1</a><br><a href="#">//TCEAL5//LSM6</a><br><a href="#">//SREK1P//ESRP2</a><br><a href="#">//GALR2</a><br><a href="#">//CDA//TIGB1BP3</a><br><a href="#">//CCL24//CIRBP</a>                                                                                                                                                                               |
| GO:0043242 | <a href="#">negative regulation of protein complex disassembly</a>        | Biological process | 2  | 47   | 168 | 23448 | 5.93920972644377 | 0.0447050722441681 | 1 | 1.34964319895575 |  | <a href="#">STMN2//LIMA1</a>                                                                                                                                                                                                                                                                                                                                                                                                                                                                |
| GO:0022607 | <a href="#">cellular component assembly</a>                               | Biological process | 14 | 1183 | 168 | 23448 | 1.65173288250211 | 0.0453550495170607 | 1 | 1.34337435457267 |  | <a href="#">ZPBP2//HIST3H2A</a><br><a href="#">//LIMA1//ACVR1C</a><br><a href="#">//LATS1//CCL24</a><br><a href="#">//STMN2//PRDX6</a><br><a href="#">//CIRBP//HMGAI</a><br><a href="#">//BAIAP2L2//TUBG2</a><br><a href="#">//CLOTNE6//CDA</a>                                                                                                                                                                                                                                             |
| GO:0048706 | <a href="#">embryonic skeletal system development</a>                     | Biological process | 3  | 111  | 168 | 23448 | 3.77220077220077 | 0.0457209638685905 | 1 | 1.33988462258127 |  | <a href="#">SIX1//HOXB6//PCSK5</a>                                                                                                                                                                                                                                                                                                                                                                                                                                                          |
| GO:0043933 | <a href="#">macromolecular complex subunit organization</a>               | Biological process | 11 | 860  | 168 | 23448 | 1.78521594684385 | 0.0457937311600456 | 1 | 1.33919396978955 |  | <a href="#">HIST3H2A//SMARCC2</a><br><a href="#">//STMN2//ACVR1C</a><br><a href="#">//LATS1//LIMA1</a><br><a href="#">//CCL24//CIRBP</a><br><a href="#">//TUBG2</a><br><a href="#">//CLOTNE6//CDA</a>                                                                                                                                                                                                                                                                                       |
| GO:0031328 | <a href="#">positive regulation of cellular biosynthetic process</a>      | Biological process | 14 | 1194 | 168 | 23448 | 1.63651591289782 | 0.048318475986726  | 1 | 1.31588677225516 |  | <a href="#">GALR2//CIRBP</a><br><a href="#">//HMGAI//PIAS2</a><br><a href="#">//NKX3-1//SIX1</a><br><a href="#">//ZBTB17//SMARCC2</a><br><a href="#">//MKL1//DYRK2</a><br><a href="#">//HHEX//PTX1//HEYL</a><br><a href="#">//FOXO6</a>                                                                                                                                                                                                                                                     |
| GO:0048731 | <a href="#">system development</a>                                        | Biological process | 28 | 2835 | 168 | 23448 | 1.37848324514991 | 0.0484770918286577 | 1 | 1.31446344166045 |  | <a href="#">PTX1//EGFL7//HHEX</a><br><a href="#">//NKX3-1//SIX1</a><br><a href="#">//PCSK5//HEYL</a><br><a href="#">//SMARCC2//ISLR2</a><br><a href="#">//CTNNA2//GRIN2B</a><br><a href="#">//ATP7B//PROM1</a><br><a href="#">//STMN2//FOXO6</a><br><a href="#">//LATS1//LATS2</a><br><a href="#">//HEPH//GALR2</a><br><a href="#">//EFHD1//SERINC5</a><br><a href="#">//TIGB1BP3//ADRA2C</a><br><a href="#">//CCL24//HOXB6</a><br><a href="#">//PIAS2//WHRN</a><br><a href="#">//BFSPI</a> |
| GO:0010557 | <a href="#">positive regulation of macromolecule biosynthetic process</a> | Biological process | 13 | 1087 | 168 | 23448 | 1.66920751741359 | 0.0492429812434556 | 1 | 1.30765566210976 |  | <a href="#">CIRBP//HMGAI</a><br><a href="#">//PIAS2//NKX3-1</a><br><a href="#">//SIX1//ZBTB17</a><br><a href="#">//SMARCC2//MKL1</a><br><a href="#">//DYRK2//HHEX</a><br><a href="#">//PTX1//HEYL</a><br><a href="#">//FOXO6</a>                                                                                                                                                                                                                                                            |
| GO:0048699 | <a href="#">generation of neurons</a>                                     | Biological process | 11 | 872  | 168 | 23448 | 1.76064875491481 | 0.0496698679622391 | 1 | 1.30390699449133 |  | <a href="#">CTNNA2//STMN2</a><br><a href="#">//GALR2//EFHD1</a><br><a href="#">//SIX1//ADRA2C</a><br><a href="#">//HEYL//ISLR2//PIAS2</a><br><a href="#">//WHRN//PROM1</a>                                                                                                                                                                                                                                                                                                                  |
| GO:0001508 | <a href="#">regulation of action potential</a>                            | Biological process | 3  | 115  | 168 | 23448 | 3.64099378881988 | 0.0498665725226402 | 1 | 1.30219048110305 |  | <a href="#">SERINC5//GRIN2B</a><br><a href="#">//CHRN4</a>                                                                                                                                                                                                                                                                                                                                                                                                                                  |
| GO:0009206 | <a href="#">purine ribonucleoside triphosphate biosynthetic process</a>   | Biological process | 2  | 50   | 168 | 23448 | 5.58285714285714 | 0.049965059054712  | 1 | 1.30133359495142 |  | <a href="#">NME5//ATP7B</a>                                                                                                                                                                                                                                                                                                                                                                                                                                                                 |
