# Supplementary material
Source: PubMed Central journal article supplement (PMC4556938)
Supplement: Table_S7.pdf [file Table_S7.pdf]

**Supplementary Table 7. Molecular function analysis of differentially upregulated genes.**

| GO.ID      | Term                                                                                          | Ontology           | Count | Pop.Hits | List.Total | Pop.Total | Fold.Enrichment  | Pvalue               | FDR               | Enrichment.Score | GENES                                                                                                                                                                                                                                                                                                                   |
|------------|-----------------------------------------------------------------------------------------------|--------------------|-------|----------|------------|-----------|------------------|----------------------|-------------------|------------------|-------------------------------------------------------------------------------------------------------------------------------------------------------------------------------------------------------------------------------------------------------------------------------------------------------------------------|
| GO:0009982 | <a href="#">pseudouridine synthase activity</a>                                               | Molecular function | 2     | 13       | 75         | 23059     | 47.3005128205128 | 0.000795505510198261 | 0.38531794580142  | 3.09935680779564 | <a href="#">PUS3/RPUSD1</a>                                                                                                                                                                                                                                                                                             |
| GO:0003676 | <a href="#">nucleic acid binding</a>                                                          | Molecular function | 18    | 2565     | 75         | 23059     | 2.15756725146199 | 0.00120436992980472  | 0.38531794580142  | 2.91924009630351 | <a href="#">LMO2/MEIS2/PBX3/POU2F1/PPARA/PRM2/RBL2/YBX2/FOXP2/THAP7/ATOH8/310003H01RIK/PAPD7/SYCP2/PUS3/RPUSD1/UPF3B/ZFP318</a>                                                                                                                                                                                         |
| GO:0003677 | <a href="#">DNA binding</a>                                                                   | Molecular function | 14    | 1753     | 75         | 23059     | 2.45541737972999 | 0.0014063581896423   | 0.38531794580142  | 2.85190405344603 | <a href="#">LMO2/FOXP2/MEIS2/PBX3/POU2F1/PPARA/PRM2/RBL2/YBX2/THAP7/ATOH8/310003H01RIK/PAPD7/SYCP2</a>                                                                                                                                                                                                                  |
| GO:0005184 | <a href="#">neuropeptide hormone activity</a>                                                 | Molecular function | 2     | 19       | 75         | 23059     | 32.3635087719298 | 0.00172209137788344  | 0.38531794580142  | 2.76394380766887 | <a href="#">ADCYAP1/NPFF</a>                                                                                                                                                                                                                                                                                            |
| GO:0016866 | <a href="#">intramolecular transferase activity</a>                                           | Molecular function | 2     | 26       | 75         | 23059     | 23.6052564102564 | 0.00322515045282349  | 0.577301931055405 | 2.4914500207785  | <a href="#">PUS3/RPUSD1</a>                                                                                                                                                                                                                                                                                             |
| GO:0005488 | <a href="#">binding</a>                                                                       | Molecular function | 47    | 10871    | 75         | 23059     | 1.32925275197007 | 0.00486462153874537  | 0.715362370301239 | 2.31295094162954 | <a href="#">DNAAJ1/MRAS/TBCE2M/RAB32/STEAP3/CDK13/MYH7/HK3/SMO2B/ENBP1/TGFB2/LMO2/PBX3/POU2F1/PPARA/RBL2/ACTN4/SRGAP3/HOOK3/SYCP2/FOXP2/CAAML4/EPDR1/RASGRP4/NPFF/YBX2/ZFP318/THAP7/MEIS2/PRM2/ATOH8/310003H01RIK/PAPD7/RUS3/RPUSD1/UPF3B/ADCYAP1/EFNA1/CCL12/HPD/SMPD4/ICGALT/ZFP147/ZFP870/SH3PX2B/NCKIPSD/SEMA6B</a> |
| GO:0000981 | <a href="#">sequence-specific DNA binding RNA polymerase II transcription factor activity</a> | Molecular function | 4     | 218      | 75         | 23059     | 5.64134556574924 | 0.00559501295207673  | 0.715362370301239 | 2.2521989037721  | <a href="#">POU2F1/FOXP2/PPARA/LMO2</a>                                                                                                                                                                                                                                                                                 |
| GO:0043565 | <a href="#">sequence-specific DNA binding</a>                                                 | Molecular function | 6     | 614      | 75         | 23059     | 3.00442996742671 | 0.0148611281628646   | 1                 | 1.82794822043351 | <a href="#">LMO2/MEIS2/PBX3/POU2F1/PPARA/FOXP2</a>                                                                                                                                                                                                                                                                      |
| GO:0046982 | <a href="#">protein heterodimerization activity</a>                                           | Molecular function | 4     | 328      | 75         | 23059     | 3.74943089430894 | 0.0221875317045424   | 1                 | 1.65389100902177 | <a href="#">TGFB2/PPARA/MYH7/SYCP2</a>                                                                                                                                                                                                                                                                                  |
| GO:0004620 | <a href="#">phospholipase activity</a>                                                        | Molecular function | 2     | 74       | 75         | 23059     | 8.30954954954955 | 0.0242458903967505   | 1                 | 1.61536186239214 | <a href="#">PLD3/SMPD4</a>                                                                                                                                                                                                                                                                                              |
| GO:0001664 | <a href="#">G-protein coupled receptor binding</a>                                            | Molecular function | 3     | 198      | 75         | 23059     | 4.65838383838384 | 0.0268095251201364   | 1                 | 1.57171087865162 | <a href="#">CCL12/ADCYAP1/NPFF</a>                                                                                                                                                                                                                                                                                      |
| GO:0008081 | <a href="#">phosphoric diester hydrolase activity</a>                                         | Molecular function | 2     | 81       | 75         | 23059     | 7.59144032921811 | 0.0286648443790873   | 1                 | 1.54265041165966 | <a href="#">PLD3/SMPD4</a>                                                                                                                                                                                                                                                                                              |
| GO:0031624 | <a href="#">ubiquitin conjugating enzyme binding</a>                                          | Molecular function | 1     | 10       | 75         | 23059     | 30.7453333333333 | 0.0320594808111341   | 1                 | 1.49404351512864 | <a href="#">PPARA</a>                                                                                                                                                                                                                                                                                                   |
| GO:0044390 | <a href="#">small protein conjugating enzyme binding</a>                                      | Molecular function | 1     | 10       | 75         | 23059     | 30.7453333333333 | 0.0320594808111341   | 1                 | 1.49404351512864 | <a href="#">PPARA</a>                                                                                                                                                                                                                                                                                                   |
| GO:0016298 | <a href="#">lipase activity</a>                                                               | Molecular function | 2     | 88       | 75         | 23059     | 6.98757575757576 | 0.0333793971845803   | 1                 | 1.4765215107297  | <a href="#">PLD3/SMPD4</a>                                                                                                                                                                                                                                                                                              |
| GO:0003700 | <a href="#">sequence-specific DNA binding transcription factor activity</a>                   | Molecular function | 6     | 743      | 75         | 23059     | 2.48279946164199 | 0.0338606554366183   | 1                 | 1.47030463955988 | <a href="#">LMO2/POU2F1/FOXP2/PPARA/MEIS2/PBX3</a>                                                                                                                                                                                                                                                                      |
| GO:0001071 | <a href="#">nucleic acid binding transcription factor activity</a>                            | Molecular function | 6     | 745      | 75         | 23059     | 2.47613422818792 | 0.0342406694314622   | 1                 | 1.46545775312023 | <a href="#">LMO2/POU2F1/MEIS2/PBX3/PPARA/FOXP2</a>                                                                                                                                                                                                                                                                      |
| GO:0001146 | <a href="#">microfilament motor activity</a>                                                  | Molecular function | 1     | 11       | 75         | 23059     | 27.950303030303  | 0.0352090985359451   | 1                 | 1.453345094097   | <a href="#">MYH7</a>                                                                                                                                                                                                                                                                                                    |
| GO:0030742 | <a href="#">GTP-dependent protein binding</a>                                                 | Molecular function | 1     | 11       | 75         | 23059     | 27.950303030303  | 0.0352090985359451   | 1                 | 1.453345094097   | <a href="#">MRAS</a>                                                                                                                                                                                                                                                                                                    |
| GO:0080025 | <a href="#">phosphatidylinositol-3-O-phosphate binding</a>                                    | Molecular function | 1     | 11       | 75         | 23059     | 27.950303030303  | 0.0352090985359451   | 1                 | 1.453345094097   | <a href="#">SH3PX2B</a>                                                                                                                                                                                                                                                                                                 |
| GO:0047485 | <a href="#">protein N-terminus binding</a>                                                    | Molecular function | 2     | 94       | 75         | 23059     | 6.54156028368794 | 0.0376441782491662   | 1                 | 1.42430217881945 | <a href="#">ACTN4/THAP7</a>                                                                                                                                                                                                                                                                                             |
| GO:0016411 | <a href="#">acetyltransferase activity</a>                                                    | Molecular function | 1     | 12       | 75         | 23059     | 25.6211111111111 | 0.0383486038123164   | 1                 | 1.41625044312685 | <a href="#">AGPAT4</a>                                                                                                                                                                                                                                                                                                  |

|            |                                                                   |                    |    |      |    |       |                  |                    |   |                  |                                                                                                                                                                                                                                                                                                                                                                                                                                                                                                  |
|------------|-------------------------------------------------------------------|--------------------|----|------|----|-------|------------------|--------------------|---|------------------|--------------------------------------------------------------------------------------------------------------------------------------------------------------------------------------------------------------------------------------------------------------------------------------------------------------------------------------------------------------------------------------------------------------------------------------------------------------------------------------------------|
| GO:0032266 | <a href="#">phosphatidylinositol-3-phosphate binding</a>          | Molecular function | 1  | 12   | 75 | 23059 | 25.6211111111111 | 0.0383486038123164 | 1 | 1.41625044312685 | <a href="#">SH3PX2B</a>                                                                                                                                                                                                                                                                                                                                                                                                                                                                          |
| GO:0005515 | <a href="#">protein binding</a>                                   | Molecular function | 26 | 5788 | 75 | 23059 | 1.38109652153882 | 0.0408163821712519 | 1 | 1.38916549233658 | <a href="#">DNAJA1//LMO2</a><br><a href="#">/NPF1//1GB2</a><br><a href="#">/ACTN4//MYH7</a><br><a href="#">/ADCYAP1</a><br><a href="#">/ENFAD//CCL12</a><br><a href="#">/HOOK3//FOXK2</a><br><a href="#">/ENBP1</a><br><a href="#">/NCKIPSD</a><br><a href="#">/HK3//PPARA</a><br><a href="#">/SEM6B</a><br><a href="#">/CDK13//MRAS</a><br><a href="#">/SH3PX2B</a><br><a href="#">/SYCP2//THAP7</a><br><a href="#">/PBX3//POU2F1</a><br><a href="#">/RBL2//UBE2W</a><br><a href="#">/SRGA2</a> |
| GO:0070742 | <a href="#">C2H2 zinc finger domain binding</a>                   | Molecular function | 1  | 13   | 75 | 23059 | 23.6502564102564 | 0.0414780286708258 | 1 | 1.38218189253678 | <a href="#">THAP7</a>                                                                                                                                                                                                                                                                                                                                                                                                                                                                            |
| GO:0046872 | <a href="#">metal ion binding</a>                                 | Molecular function | 17 | 3385 | 75 | 23059 | 1.54407877892664 | 0.0420350631819068 | 1 | 1.37638829546859 | <a href="#">FOXK2//ACTN4</a><br><a href="#">/CALML4</a><br><a href="#">/EPDR1</a><br><a href="#">/RASGRP4</a><br><a href="#">/STEAP3//LMO2</a><br><a href="#">/PPARA//ZFP18</a><br><a href="#">/HPD//DNAJA1</a><br><a href="#">/THAP7//SMPD4</a><br><a href="#">/CIGAL11</a><br><a href="#">/DAPD7//ZFP14</a><br><a href="#">/ZFP870</a>                                                                                                                                                         |
| GO:0003729 | <a href="#">mRNA binding</a>                                      | Molecular function | 2  | 100  | 75 | 23059 | 6.14906666666667 | 0.04210568919958   | 1 | 1.37565921957873 | <a href="#">YBX2//LIPF3B</a>                                                                                                                                                                                                                                                                                                                                                                                                                                                                     |
| GO:0001882 | <a href="#">nucleoside binding</a>                                | Molecular function | 1  | 14   | 75 | 23059 | 21.9609523809524 | 0.0445974050419833 | 1 | 1.35069041054199 | <a href="#">ACTN4</a>                                                                                                                                                                                                                                                                                                                                                                                                                                                                            |
| GO:0043169 | <a href="#">cation binding</a>                                    | Molecular function | 17 | 3426 | 75 | 23059 | 1.52560031134462 | 0.0463581263583398 | 1 | 1.33387412509579 | <a href="#">FOXK2//ACTN4</a><br><a href="#">/CALML4</a><br><a href="#">/EPDR1</a><br><a href="#">/RASGRP4</a><br><a href="#">/HPD//DNAJA1</a><br><a href="#">/LMO2//PPARA</a><br><a href="#">/ZFP18//STEAP3</a><br><a href="#">/THAP7//SMPD4</a><br><a href="#">/CIGAL11</a><br><a href="#">/DAPD7//ZFP14</a><br><a href="#">/ZFP870</a>                                                                                                                                                         |
| GO:0043167 | <a href="#">ion binding</a>                                       | Molecular function | 17 | 3438 | 75 | 23059 | 1.52027535388792 | 0.0476827650856735 | 1 | 1.32163856814553 | <a href="#">FOXK2//ACTN4</a><br><a href="#">/CALML4</a><br><a href="#">/EPDR1</a><br><a href="#">/RASGRP4</a><br><a href="#">/HPD//DNAJA1</a><br><a href="#">/LMO2//PPARA</a><br><a href="#">/ZFP18//STEAP3</a><br><a href="#">/THAP7//SMPD4</a><br><a href="#">/CIGAL11</a><br><a href="#">/DAPD7//ZFP14</a><br><a href="#">/ZFP870</a>                                                                                                                                                         |
| GO:0050750 | <a href="#">low-density lipoprotein particle receptor binding</a> | Molecular function | 1  | 15   | 75 | 23059 | 20.4968888888889 | 0.0477067647565355 | 1 | 1.32142003420664 | <a href="#">DNAJA1</a>                                                                                                                                                                                                                                                                                                                                                                                                                                                                           |
