# Supplementary material
Source: PubMed Central journal article supplement (PMC4556938)
Supplement: Table_S8.pdf [file Table_S8.pdf]

**Supplementary Table 8. Molecular function analysis of differentially downregulated genes.**

| GO.ID      | Term                                              | Ontology           | Count | Pop.Hits | List.Total | Pop.Total | Fold.Enrichment  | Pvalue               | FDR               | Enrichment.Score | GENES                                                                                                                                                                                                                                                                                                                                                                                                                                                                                                                                                                                                                                                                                                                                                                                                                                                                                                                                                                                                                                                                                                                                                                                                                                                                                                                                                                                                                                                                                                                                                                                                                                                                                                                                                                                                                                                                                                                                                                                                                                                                                                                                                                                                                                                                                                                                                                                                                                                                                                                                                                                                                                                                                                                   |
|------------|---------------------------------------------------|--------------------|-------|----------|------------|-----------|------------------|----------------------|-------------------|------------------|-------------------------------------------------------------------------------------------------------------------------------------------------------------------------------------------------------------------------------------------------------------------------------------------------------------------------------------------------------------------------------------------------------------------------------------------------------------------------------------------------------------------------------------------------------------------------------------------------------------------------------------------------------------------------------------------------------------------------------------------------------------------------------------------------------------------------------------------------------------------------------------------------------------------------------------------------------------------------------------------------------------------------------------------------------------------------------------------------------------------------------------------------------------------------------------------------------------------------------------------------------------------------------------------------------------------------------------------------------------------------------------------------------------------------------------------------------------------------------------------------------------------------------------------------------------------------------------------------------------------------------------------------------------------------------------------------------------------------------------------------------------------------------------------------------------------------------------------------------------------------------------------------------------------------------------------------------------------------------------------------------------------------------------------------------------------------------------------------------------------------------------------------------------------------------------------------------------------------------------------------------------------------------------------------------------------------------------------------------------------------------------------------------------------------------------------------------------------------------------------------------------------------------------------------------------------------------------------------------------------------------------------------------------------------------------------------------------------------|
| GO:005488  | <a href="#">binding</a>                           | Molecular function | 104   | 10871    | 169        | 23059     | 1.30532185136177 | 0.000112351631878832 | 0.100554710531555 | 3.94942061518233 | <a href="#">D63004ZP16RK</a> / <a href="#">ATP7B</a><br><a href="#">/CRBP</a> / <a href="#">GALK1</a> / <a href="#">KIF9</a><br><a href="#">/LATS1</a> / <a href="#">LATS2</a> / <a href="#">STK35</a><br><a href="#">/CPEB4</a> / <a href="#">DYRK2</a><br><a href="#">/ITGB1BP3</a> / <a href="#">RASL12</a><br><a href="#">/KATNAL2</a> / <a href="#">ESRP2</a><br><a href="#">/MAG13</a> / <a href="#">TUBG2</a><br><a href="#">/ACVR1C</a> / <a href="#">TIPK3</a><br><a href="#">/BSP1</a> / <a href="#">CACNB1</a><br><a href="#">/RUNX1T1</a> / <a href="#">GRIN2B</a><br><a href="#">/MARCKS</a> / <a href="#">PIAS2</a><br><a href="#">/NKX3-1</a> / <a href="#">TMN2</a><br><a href="#">/SIX1</a> / <a href="#">TERF2</a> / <a href="#">ZBTB17</a><br><a href="#">/HEY1</a> / <a href="#">CD200R1</a><br><a href="#">/RNF20</a> / <a href="#">TEX19.2</a><br><a href="#">/WHRN</a> / <a href="#">INERSE2</a><br><a href="#">/ANK2</a> / <a href="#">EMD2</a> / <a href="#">MKL1</a><br><a href="#">/ISLR2</a><br><a href="#">/KCP</a> / <a href="#">A730011L01RIK</a><br><a href="#">/PDP1</a> / <a href="#">CIRA</a> / <a href="#">CD248</a><br><a href="#">/CAPN9</a> / <a href="#">EHF1</a><br><a href="#">/SCGN</a> / <a href="#">SYNRG</a><br><a href="#">/EGFL7</a> / <a href="#">CDA</a> / <a href="#">ZFP2</a><br><a href="#">/ZFP62</a> / <a href="#">SREK1P1</a><br><a href="#">/ZFP618</a> / <a href="#">ARPF21</a><br><a href="#">/HHEX</a> / <a href="#">HOXB3</a><br><a href="#">/MBD4</a> / <a href="#">PTX1</a> / <a href="#">RFX2</a><br><a href="#">/TCE25</a> / <a href="#">SMARCC2</a><br><a href="#">/CASZ1</a> / <a href="#">HIST3H2A</a><br><a href="#">/FOXO6</a> / <a href="#">LSM6</a><br><a href="#">/TCEAL4</a> / <a href="#">TCEAL5</a><br><a href="#">/LIM1</a> / <a href="#">MIB2</a><br><a href="#">/GPRC5C</a> / <a href="#">CCL24</a><br><a href="#">/ITEN</a> / <a href="#">ALOX8</a> / <a href="#">HEPH</a><br><a href="#">/B4GAL12</a> / <a href="#">ZFP566</a><br><a href="#">/NTSDC3</a> / <a href="#">TPH2</a><br><a href="#">/WDFY2</a> / <a href="#">CACNA2D4</a><br><a href="#">/ENKUR</a> / <a href="#">ECM2</a> / <a href="#">NME5</a><br><a href="#">/BAIAP2L2</a> / <a href="#">FAM109B</a><br><a href="#">/MGL1</a> / <a href="#">GOLPH3</a><br><a href="#">/SECF4</a> / <a href="#">HMGAI1</a><br><a href="#">/LIP1</a> / <a href="#">DAM3</a><br><a href="#">/C101NE9</a> / <a href="#">ABAT</a><br><a href="#">/PDE6H</a> / <a href="#">ADRA2C</a><br><a href="#">/ACPF</a> / <a href="#">CHRN4</a><br><a href="#">/PCSK5</a> / <a href="#">PROM1</a><br><a href="#">/GALR2</a> / <a href="#">CTNNA2</a><br><a href="#">/CHDB1</a> / <a href="#">ITC5</a> |
| GO:0043176 | <a href="#">amine binding</a>                     | Molecular function | 5     | 145      | 169        | 23059     | 4.70495817180167 | 0.00435525456783478  | 0.902475224163372 | 2.36098645508232 | <a href="#">GRIN2B</a> / <a href="#">TPH2</a> / <a href="#">ACPP</a><br><a href="#">/CHRN4</a> / <a href="#">ADRA2C</a>                                                                                                                                                                                                                                                                                                                                                                                                                                                                                                                                                                                                                                                                                                                                                                                                                                                                                                                                                                                                                                                                                                                                                                                                                                                                                                                                                                                                                                                                                                                                                                                                                                                                                                                                                                                                                                                                                                                                                                                                                                                                                                                                                                                                                                                                                                                                                                                                                                                                                                                                                                                                 |
| GO:0003785 | <a href="#">actin monomer binding</a>             | Molecular function | 2     | 14       | 169        | 23059     | 19.4919695688926 | 0.004585957150133    | 0.902475224163372 | 2.33857000751008 | <a href="#">LIMA1</a> / <a href="#">MKL1</a>                                                                                                                                                                                                                                                                                                                                                                                                                                                                                                                                                                                                                                                                                                                                                                                                                                                                                                                                                                                                                                                                                                                                                                                                                                                                                                                                                                                                                                                                                                                                                                                                                                                                                                                                                                                                                                                                                                                                                                                                                                                                                                                                                                                                                                                                                                                                                                                                                                                                                                                                                                                                                                                                            |
| GO:0043169 | <a href="#">cation binding</a>                    | Molecular function | 38    | 3426     | 169        | 23059     | 1.51338701264607 | 0.00518972340324717  | 0.902475224163372 | 2.28485578813315 | <a href="#">LATS1</a> / <a href="#">DYRK2</a><br><a href="#">/A730011L01RIK</a> / <a href="#">PDP1</a><br><a href="#">/CIRA</a> / <a href="#">CD248</a> / <a href="#">CAPN9</a><br><a href="#">/EHF1</a> / <a href="#">SCGN</a><br><a href="#">/SYNRG</a> / <a href="#">EGFL7</a><br><a href="#">/ALOX8</a> / <a href="#">ATP7B</a><br><a href="#">/RUNX1T1</a> / <a href="#">GRIN2B</a><br><a href="#">/HEPH</a> / <a href="#">PIAS2</a> / <a href="#">ZBTB17</a><br><a href="#">/ZFP2</a> / <a href="#">ZFP62</a> / <a href="#">LATS2</a><br><a href="#">/B4GAL12</a> / <a href="#">LIMA1</a><br><a href="#">/RNF20</a> / <a href="#">SREK1P1</a><br><a href="#">/ITGB1BP3</a> / <a href="#">CASZ1</a><br><a href="#">/CDA</a> / <a href="#">ZFP566</a> / <a href="#">ZFP618</a><br><a href="#">/MIB2</a> / <a href="#">NTSDC3</a> / <a href="#">TPH2</a><br><a href="#">/WDFY2</a> / <a href="#">ACVR1C</a><br><a href="#">/CACNA2D4</a> / <a href="#">ADAM23</a><br><a href="#">/ACPP</a>                                                                                                                                                                                                                                                                                                                                                                                                                                                                                                                                                                                                                                                                                                                                                                                                                                                                                                                                                                                                                                                                                                                                                                                                                                                                                                                                                                                                                                                                                                                                                                                                                                                                                                                           |
| GO:0043167 | <a href="#">ion binding</a>                       | Molecular function | 38    | 3438     | 169        | 23059     | 1.5081046845042  | 0.00550069784323376  | 0.902475224163372 | 2.25958221046203 | <a href="#">LATS1</a> / <a href="#">DYRK2</a><br><a href="#">/A730011L01RIK</a> / <a href="#">PDP1</a><br><a href="#">/CIRA</a> / <a href="#">CD248</a> / <a href="#">CAPN9</a><br><a href="#">/EHF1</a> / <a href="#">SCGN</a><br><a href="#">/SYNRG</a> / <a href="#">EGFL7</a><br><a href="#">/ALOX8</a> / <a href="#">ATP7B</a><br><a href="#">/RUNX1T1</a> / <a href="#">GRIN2B</a><br><a href="#">/HEPH</a> / <a href="#">PIAS2</a> / <a href="#">ZBTB17</a><br><a href="#">/ZFP2</a> / <a href="#">ZFP62</a> / <a href="#">LATS2</a><br><a href="#">/B4GAL12</a> / <a href="#">LIMA1</a><br><a href="#">/RNF20</a> / <a href="#">SREK1P1</a><br><a href="#">/ITGB1BP3</a> / <a href="#">CASZ1</a><br><a href="#">/CDA</a> / <a href="#">ZFP566</a> / <a href="#">ZFP618</a><br><a href="#">/MIB2</a> / <a href="#">NTSDC3</a> / <a href="#">TPH2</a><br><a href="#">/WDFY2</a> / <a href="#">ACVR1C</a><br><a href="#">/CACNA2D4</a> / <a href="#">ADAM23</a><br><a href="#">/ACPP</a>                                                                                                                                                                                                                                                                                                                                                                                                                                                                                                                                                                                                                                                                                                                                                                                                                                                                                                                                                                                                                                                                                                                                                                                                                                                                                                                                                                                                                                                                                                                                                                                                                                                                                                                           |
| GO:0042803 | <a href="#">protein homodimerization activity</a> | Molecular function | 10    | 538      | 169        | 23059     | 2.53612986955852 | 0.00648057175405533  | 0.902475224163372 | 2.1883866764323  | <a href="#">ADRA2C</a> / <a href="#">RUNX1T1</a><br><a href="#">/HHEX</a> / <a href="#">TERF2</a> / <a href="#">MGL1</a><br><a href="#">/HEY1</a> / <a href="#">ACPP</a><br><a href="#">/CDA</a> / <a href="#">ABAT</a><br><a href="#">/FAM109B</a>                                                                                                                                                                                                                                                                                                                                                                                                                                                                                                                                                                                                                                                                                                                                                                                                                                                                                                                                                                                                                                                                                                                                                                                                                                                                                                                                                                                                                                                                                                                                                                                                                                                                                                                                                                                                                                                                                                                                                                                                                                                                                                                                                                                                                                                                                                                                                                                                                                                                     |
| GO:0046872 | <a href="#">metal ion binding</a>                 | Molecular function | 37    | 3385     | 169        | 23059     | 1.49140919301128 | 0.00741123949254666  | 0.902475224163372 | 2.13010915237742 | <a href="#">LATS1</a> / <a href="#">DYRK2</a><br><a href="#">/A730011L01RIK</a> / <a href="#">PDP1</a><br><a href="#">/CIRA</a> / <a href="#">CD248</a> / <a href="#">CAPN9</a><br><a href="#">/EHF1</a> / <a href="#">SCGN</a><br><a href="#">/SYNRG</a> / <a href="#">EGFL7</a><br><a href="#">/ALOX8</a> / <a href="#">TPH2</a> / <a href="#">ATP7B</a><br><a href="#">/HEPH</a> / <a href="#">RUNX1T1</a><br><a href="#">/GRIN2B</a> / <a href="#">PIAS2</a><br><a href="#">/ZBTB17</a> / <a href="#">ZFP2</a> / <a href="#">ZFP62</a><br><a href="#">/ADAM23</a> / <a href="#">LIMA1</a><br><a href="#">/RNF20</a> / <a href="#">SREK1P1</a><br><a href="#">/CASZ1</a> / <a href="#">CDA</a> / <a href="#">ZFP618</a><br><a href="#">/MIB2</a> / <a href="#">LATS2</a><br><a href="#">/B4GAL12</a> / <a href="#">ITGB1BP3</a><br><a href="#">/ZFP566</a> / <a href="#">NTSDC3</a><br><a href="#">/WDFY2</a> / <a href="#">ACVR1C</a><br><a href="#">/CACNA2D4</a>                                                                                                                                                                                                                                                                                                                                                                                                                                                                                                                                                                                                                                                                                                                                                                                                                                                                                                                                                                                                                                                                                                                                                                                                                                                                                                                                                                                                                                                                                                                                                                                                                                                                                                                                                  |

|            |                                                                             |                    |    |      |     |       |                  |                     |                   |                  |                                                                                                                                                                                                                                                                                        |
|------------|-----------------------------------------------------------------------------|--------------------|----|------|-----|-------|------------------|---------------------|-------------------|------------------|----------------------------------------------------------------------------------------------------------------------------------------------------------------------------------------------------------------------------------------------------------------------------------------|
| GO:0050839 | <a href="#">cell adhesion molecule binding</a>                              | Molecular function | 3  | 56   | 169 | 23059 | 7.30948858833474 | 0.00806681764615305 | 0.902475224163372 | 2.09329776035772 | CTNNA2//PROM1/GRIN2B                                                                                                                                                                                                                                                                   |
| GO:0042165 | <a href="#">neurotransmitter binding</a>                                    | Molecular function | 2  | 22   | 169 | 23059 | 12.4039806347499 | 0.0112030151762681  | 1                 | 1.95066507570628 | CHRNB4/GRIN2B                                                                                                                                                                                                                                                                          |
| GO:0045296 | <a href="#">cadherin binding</a>                                            | Molecular function | 2  | 22   | 169 | 23059 | 12.4039806347499 | 0.0112030151762681  | 1                 | 1.95066507570628 | CTNNA2//PROM1                                                                                                                                                                                                                                                                          |
| GO:0003746 | <a href="#">translation elongation factor activity</a>                      | Molecular function | 2  | 24   | 169 | 23059 | 11.370315581854  | 0.0132579979736347  | 1                 | 1.87752205169647 | TCEAL8/TCEAL5                                                                                                                                                                                                                                                                          |
| GO:0046983 | <a href="#">protein dimerization activity</a>                               | Molecular function | 12 | 799  | 169 | 23059 | 2.04921832764328 | 0.0149294962107943  | 1                 | 1.82595484710174 | ADRA2C/RUNX1T1/HHEX/TERF2/MGLL1/HEYL/ACPP/CDA/ABAT/EAM109B/GRIN2B/LSM6                                                                                                                                                                                                                 |
| GO:0016776 | <a href="#">phosphotransferase activity, phosphate group as acceptor</a>    | Molecular function | 2  | 28   | 169 | 23059 | 9.74598478444632 | 0.0178142437407997  | 1                 | 1.74923260980856 | IP6K3/NME5                                                                                                                                                                                                                                                                             |
| GO:0030331 | <a href="#">estrogen receptor binding</a>                                   | Molecular function | 2  | 28   | 169 | 23059 | 9.74598478444632 | 0.0178142437407997  | 1                 | 1.74923260980856 | PIAS2/NKX3-1                                                                                                                                                                                                                                                                           |
| GO:0005262 | <a href="#">calcium channel activity</a>                                    | Molecular function | 3  | 76   | 169 | 23059 | 5.3859389598256  | 0.0184011334874324  | 1                 | 1.73515542415485 | CACNB1/GRIN2B/CACNA2D4                                                                                                                                                                                                                                                                 |
| GO:0003676 | <a href="#">nucleic acid binding</a>                                        | Molecular function | 28 | 2565 | 169 | 23059 | 1.4894448481493  | 0.0204093433889738  | 1                 | 1.69017096721595 | NKX3-1/HEYL/HHEX/HOXB6/MBD4/PIAS2/PTX1/REX2/SIX1/TERF2/ZBTB17/ZFP2/TCF25/SMARCC2/CASZ1/ZFP618/HIST3H2A/FOXO6/CIRBP/CFEB4/ESRP2/LSM6/TCEAL8/TCEAL5/ZFP62/SREK1IP1/ARPP21/MKLI                                                                                                           |
| GO:0003700 | <a href="#">sequence-specific DNA binding transcription factor activity</a> | Molecular function | 11 | 743  | 169 | 23059 | 2.02002914778564 | 0.0213039945678316  | 1                 | 1.67153895730705 | NKX3-1/HEYL/HMGAI/FOXO6/RUNX1T1/HHEX/HOXB6/PTX1/SIX1/ZBTB17/TCF25                                                                                                                                                                                                                      |
| GO:0001071 | <a href="#">nucleic acid binding transcription factor activity</a>          | Molecular function | 11 | 745  | 169 | 23059 | 2.01460625074461 | 0.0216779889405665  | 1                 | 1.66398100961177 | NKX3-1/HEYL/HMGAI/RUNX1T1/HHEX/HOXB6/PTX1/SIX1/ZBTB17/TCF25/FOXO6                                                                                                                                                                                                                      |
| GO:0046914 | <a href="#">transition metal ion binding</a>                                | Molecular function | 19 | 1591 | 169 | 23059 | 1.62943554535683 | 0.0243455955748602  | 1                 | 1.6135795966896  | ALOX8/TPH2/ATP7B/HEPH/RUNX1T1/GRIN2B/PIAS2/ZBTB17/ZFP2/ZFP62/ADAM23/LMA1/RNF220/SREK1IP1/CASZ1/CDA/ZFP618/MBD2/DYRK2                                                                                                                                                                   |
| GO:0004252 | <a href="#">serine-type endopeptidase activity</a>                          | Molecular function | 4  | 152  | 169 | 23059 | 3.59062597321707 | 0.0257989106806746  | 1                 | 1.58839863106621 | PCSK5/CIRA/PRSS23/BRSS48                                                                                                                                                                                                                                                               |
| GO:0016298 | <a href="#">lipase activity</a>                                             | Molecular function | 3  | 88   | 169 | 23059 | 4.6514927380312  | 0.026964375708401   | 1                 | 1.56920963024454 | LIPH/PRDX6/MGLL                                                                                                                                                                                                                                                                        |
| GO:0016787 | <a href="#">hydrolase activity</a>                                          | Molecular function | 24 | 2171 | 169 | 23059 | 1.50836061150344 | 0.0274221727587433  | 1                 | 1.56189813744772 | RASL12/TUBG2/CAPN9/KIF9/PCSK5/CIRA/PRSS23/BRSS48/NAGPA/ACPP/ATP7B/KATNAL2/MGLL/PDE6H/CDA/BC051665/ADAM23/TERF2/A73001L01RIK/LIPH/PRDX6/PDP1/MBD4/NTSDC3                                                                                                                                |
| GO:000287  | <a href="#">magnesium ion binding</a>                                       | Molecular function | 4  | 159  | 169 | 23059 | 3.43254810018235 | 0.0297669740460767  | 1                 | 1.52626531120091 | LATS1/DYRK2/A73001L01RIK/PDP1                                                                                                                                                                                                                                                          |
| GO:0003824 | <a href="#">catalytic activity</a>                                          | Molecular function | 48 | 5078 | 169 | 23059 | 1.28974040471602 | 0.0303024020547532  | 1                 | 1.5185229438483  | RASL12/TUBG2/IP6K3/CAPN9/CHST2/KIF9/PCSK5/CIRA/BRSS23/BRSS48/MB4GAL1/AGPAT1/ABAT/HMGAI/NAGPA/ACPP/ATP7B/KATNAL2/MGLL/PDE6H/CDA/BC051665/ADAM23/TERF2/GAL1/TPH2/A73001L01RIK/NME5/PRDX6/LIPH/LATS1/LATS2/STK35/DYRK2/ACV1C/PDP1/RNF220/MB2/CHST1/TGFB1P3/MAG3/SEC14L2/MBD4/NTSDC3/PIAS2 |
| GO:0035257 | <a href="#">nuclear hormone receptor binding</a>                            | Molecular function | 3  | 94   | 169 | 23059 | 4.35458894624197 | 0.0319162244938063  | 1                 | 1.49598848882773 | PIAS2/NKX3-1/HMGAI                                                                                                                                                                                                                                                                     |
| GO:0042802 | <a href="#">identical protein binding</a>                                   | Molecular function | 11 | 798  | 169 | 23059 | 1.88080408120894 | 0.0334480399400255  | 1                 | 1.47562932686991 | ADRA2C/RUNX1T1/HHEX/TERF2/MGLL1/HEYL/ACPP/CDA/ABAT/EAM109B/C1QTNF6                                                                                                                                                                                                                     |
| GO:0005509 | <a href="#">calcium ion binding</a>                                         | Molecular function | 8  | 508  | 169 | 23059 | 2.14872105483856 | 0.0340493208420982  | 1                 | 1.46789154623198 | CIRA/CD248/CAPN9/EHFD1/SCGN/SYNRG/EGFL7/PDP1                                                                                                                                                                                                                                           |

|            |                                                                            |                    |   |    |     |       |                  |                    |   |                  |                               |
|------------|----------------------------------------------------------------------------|--------------------|---|----|-----|-------|------------------|--------------------|---|------------------|-------------------------------|
| GO:0043178 | <a href="#">alcohol binding</a>                                            | Molecular function | 2 | 42 | 169 | 23059 | 6.49732318963088 | 0.0379672961016392 | 1 | 1.42059033069668 | <a href="#">ACPP/ADRA2C</a>   |
| GO:0005231 | <a href="#">excitatory extracellular ligand-gated ion channel activity</a> | Molecular function | 2 | 45 | 169 | 23059 | 6.06416831032216 | 0.0430415177722582 | 1 | 1.36611242255323 | <a href="#">CHRNB4/GRIN2B</a> |
| GO:0001047 | <a href="#">core promoter binding</a>                                      | Molecular function | 2 | 46 | 169 | 23059 | 5.93233856444559 | 0.0447861662198357 | 1 | 1.34885611238968 | <a href="#">HEY1/NKX3-1</a>   |
| GO:0008146 | <a href="#">sulfotransferase activity</a>                                  | Molecular function | 2 | 48 | 169 | 23059 | 5.68515779092702 | 0.04835248014889   | 1 | 1.31558124469675 | <a href="#">CHST2/CHST1</a>   |
