# Supplementary material
Source: PubMed Central journal article supplement (PMC4556938)
Supplement: Table_S9.pdf [file Table_S9.pdf]

**Supplemental Table S9. Genes used in the custom-designed Taqman 96-well plate array.**

**Assay IDs**

|          | 1                 | 2                 | 3                 | 4                 | 5                 | 6                 | 7                 | 8                 | 9                 | 10                | 11                | 12                |
|----------|-------------------|-------------------|-------------------|-------------------|-------------------|-------------------|-------------------|-------------------|-------------------|-------------------|-------------------|-------------------|
| <b>A</b> | Hs999999<br>01_s1 | Mm0154<br>5399_m1 | Mm0128<br>7243_m1 | Mm0044<br>1203_m1 | Mm0133<br>9500_m1 | Mm0047<br>9413_m1 | Mm0048<br>1847_m1 | Mm0125<br>0826_gH | Mm0420<br>8097_gH | Mm0420<br>6919_gH | Mm0161<br>7100_m1 | Mm00487<br>748_m1 |
| <b>B</b> | Mm013255<br>34_m1 | Mm0399<br>2643_g1 | Mm0048<br>5144_m1 | Mm0117<br>6889_m1 | Mm0127<br>7365_g1 | Mm0161<br>2859_m1 | Mm0420<br>6921_gH | Mm0045<br>8960_m1 | Mm0116<br>4723_m1 | Mm0123<br>5487_m1 | Mm0170<br>2218_m1 | Mm03048<br>199_m1 |
| <b>C</b> | Mm005024<br>89_m1 | Mm0117<br>1272_m1 | Mm0417<br>9196_s1 | Mm0044<br>6453_m1 | Mm0083<br>5341_m1 | Mm0124<br>2468_m1 | Mm0128<br>1680_m1 | Mm0121<br>2616_m1 | Mm0420<br>4866_gH | Mm0127<br>3666_m1 | Mm0048<br>6960_m1 | Mm00623<br>224_m1 |
| <b>D</b> | Mm004640<br>55_m1 | Mm0129<br>7389_m1 | Mm0124<br>3172_m1 | Mm0083<br>6704_s1 | Mm0134<br>1942_m1 | Mm0084<br>0848_m1 | Mm0055<br>1153_m1 | Mm0131<br>9006_g1 | Mm0046<br>9627_m1 | Mm0050<br>9777_m1 | Mm0134<br>4923_m1 | Mm00504<br>484_m1 |
| <b>E</b> | Mm004810<br>09_g1 | Mm0080<br>1734_m1 | Mm0044<br>0939_m1 | Mm0051<br>5970_m1 | Mm0154<br>5250_m1 | Mm0051<br>6111_m1 | Mm0128<br>8934_m1 | Mm0061<br>8325_m1 | Mm0252<br>8926_s1 | Mm0061<br>5085_s1 | Mm0420<br>9003_m1 | Mm00517<br>749_m1 |
| <b>F</b> | Mm006180<br>04_m1 | Mm0119<br>0080_m1 | Mm0050<br>3287_m1 | Mm0132<br>4644_m1 | Mm0122<br>3180_m1 | Mm0051<br>2973_m1 | Mm0134<br>2020_g1 | Mm0048<br>1472_m1 | Mm0197<br>2869_s1 | Mm0123<br>0949_m1 | Mm0049<br>1164_m1 | Mm00502<br>829_m1 |
| <b>G</b> | Mm012107<br>99_m1 | Mm0044<br>0824_m1 | Mm0130<br>5007_m1 | Mm0062<br>4464_m1 | Mm0129<br>4171_g1 | Mm0049<br>5130_m1 | Mm0126<br>7564_m1 | Mm0276<br>4210_s1 | Mm0055<br>7621_m1 | Mm0044<br>4701_m1 | Mm0129<br>6602_m1 | Mm01309<br>619_g1 |
| <b>H</b> | Mm008049<br>52_m1 | Mm0121<br>2795_m1 | Mm0044<br>3176_m1 | Mm0043<br>4513_m1 | Mm0047<br>9556_m1 | Mm0049<br>0018_g1 | Mm0049<br>9420_m1 | Mm0048<br>6771_m1 | Mm0130<br>6805_m1 | Mm0051<br>5399_m1 | Mm0135<br>2473_m1 | Mm00444<br>182_m1 |

**Gene Symbols**

|          | 1      | 2        | 3             | 4             | 5                                                | 6          | 7                                | 8       | 9                                                       | 10                         | 11      | 12      |
|----------|--------|----------|---------------|---------------|--------------------------------------------------|------------|----------------------------------|---------|---------------------------------------------------------|----------------------------|---------|---------|
| <b>A</b> | 18S    | Hprt     | Steap3        | Saa3          | Sppl2a                                           | Pbx3       | Tbc1d15                          | Ybx2    | Gm14548,Pira1,Pira11,Pira2,Pira4,Pira5,Pira6,Pira7,Pirb | Gm14548,Pira11,Pira4,Pira7 | Ccl12   | Meis2   |
| <b>B</b> | Gm6792 | Gm6904   | Mras          | Fam219b       | Tssc4                                            | Serpinai3i | Gm14548,Pira11,Pira4,Pira5,Pira7 | Rab32   | Cdk13                                                   | Nckipso                    | Zfp870  | Prm2    |
| <b>C</b> | Actn4  | Pld3     | Smok2b        | Sfxn3         | Gm3404,Gm3402,Gm3409,Gm6370,Gm3415,4930449124Rik | Rbl2       | Lmo2                             | Hook3   | Gm13102,Pramel4,Pramel5                                 | Zfp318                     | Ift81   | Sycp2   |
| <b>D</b> | Atoh8  | Upf3b    | 2310003H01Rik | Olfir954      | Hk3                                              | Epdr1      | Rpusd1                           | Myh7    | Slc43a3                                                 | Agpat4                     | Thap7   | Srgap3  |
| <b>E</b> | Pus3   | Hpd      | Ppara         | Heph          | Ubxn10                                           | Klrc1      | BC053393                         | Ank2    | Zfp2                                                    | Tmem139                    | Enkur   | Lima1   |
| <b>F</b> | Egfl7  | Cacna2d4 | Aar2          | 4930529M08Rik | Prss48                                           | Atg2b      | Zbtb17                           | Cdrt4   | Prss23                                                  | Hnrnpul2                   | Cd200r1 | Col26a1 |
| <b>G</b> | Gareml | Pitx1    | Slc25a53      | D630003M21Rik | Sertm1                                           | Kif9       | Zfp618                           | Zfp62   | Fam180a                                                 | Ccl24                      | Adora3  | Tceal5  |
| <b>H</b> | Chrb4  | Efn1     | Sema6b        | Itgb2         | B4galt2                                          | Chst2      | Golph3                           | Runx1t1 | Cacnb1                                                  | Ctnna2                     | Slc9a3  | Galk1   |

A1-A2: housekeeping genes, A3-E3: genes differentially upregulated in carvedilol-treated mouse hearts (see Table 2), E4-H1: genes differentially downregulated in carvedilol-treated mouse hearts (see Table 3), H2-H4: genes differentially upregulated in carvedilol-treated mouse hearts (see Supplementary Table 1), H5-H12: genes differentially downregulated in carvedilol-treated mouse hearts (see Supplementary Table 2).

**Detector (gene probe)**

18S-Hs99999901\_s1

Hprt-Mm01545399\_m1

Steap3-Mm01287243\_m1

Saa3-Mm00441203\_m1

Sppl2a-Mm01339500\_m1

**Description**

Eukaryotic 18S rRNA

hypoxanthine guanine phosphoribosyl transferase

STEAP family member 3

serum amyloid A 3

signal peptide peptidase like 2A

|                                                                       |                                                                                                                                                                                                                                                      |
|-----------------------------------------------------------------------|------------------------------------------------------------------------------------------------------------------------------------------------------------------------------------------------------------------------------------------------------|
| Pbx3-Mm00479413_m1                                                    | pre B cell leukemia homeobox 3                                                                                                                                                                                                                       |
| Tbc1d15-Mm00481847_m1                                                 | TBC1 domain family, member 15                                                                                                                                                                                                                        |
| Ybx2-Mm01250826_gH                                                    | Y box protein 2                                                                                                                                                                                                                                      |
| Gm14548;Pira1;Pira11;Pira2;Pira4;Pira5;Pira6;Pira7;Pirb-Mm04208097_gH | predicted gene 14548, paired-Ig-like receptor A1, paired-Ig-like receptor A11, paired-Ig-like receptor A2, paired-Ig-like receptor A4, paired-Ig-like receptor A5, paired-Ig-like receptor A6, paired-Ig-like receptor A7, paired-Ig-like receptor B |
| Gm14548;Pira11;Pira4;Pira7-Mm04206919_gH                              | predicted gene 14548, paired-Ig-like receptor A11, paired-Ig-like receptor A4, paired-Ig-like receptor A7                                                                                                                                            |
| Ccl12-Mm01617100_m1                                                   | chemokine (C-C motif) ligand 12                                                                                                                                                                                                                      |
| Meis2-Mm00487748_m1                                                   | Meis homeobox 2                                                                                                                                                                                                                                      |
| Gm6792-Mm01325534_m1                                                  | predicted gene 6792                                                                                                                                                                                                                                  |
| Gm6904-Mm03992643_g1                                                  | predicted gene 6904                                                                                                                                                                                                                                  |
| Mras-Mm00485144_m1                                                    | muscle and microspikes RAS                                                                                                                                                                                                                           |
| Fam219b-Mm01176889_m1                                                 | family with sequence similarity 219, member B                                                                                                                                                                                                        |
| Tssc4-Mm01277365_g1                                                   | tumor-suppressing subchromosomal transferable fragment 4                                                                                                                                                                                             |
| Serpina3i-Mm01612859_m1                                               | serine (or cysteine) peptidase inhibitor, clade A, member 3I                                                                                                                                                                                         |
| Gm14548;Pira11;Pira4;Pira5;Pira7-Mm04206921_gH                        | predicted gene 14548, paired-Ig-like receptor A11, paired-Ig-like receptor A4, paired-Ig-like receptor A5, paired-Ig-like receptor A7                                                                                                                |
| Rab32-Mm00458960_m1                                                   | RAB32, member RAS oncogene family                                                                                                                                                                                                                    |
| Cdk13-Mm01164723_m1                                                   | cyclin-dependent kinase 13                                                                                                                                                                                                                           |
| Nckipsd-Mm01235487_m1                                                 | NCK interacting protein with SH3 domain                                                                                                                                                                                                              |
| Zfp870-Mm01702218_m1                                                  | zinc finger protein 870                                                                                                                                                                                                                              |
| Prm2-Mm03048199_m1                                                    | protamine 2                                                                                                                                                                                                                                          |
| Actn4-Mm00502489_m1                                                   | actinin alpha 4                                                                                                                                                                                                                                      |
| Pld3-Mm01171272_m1                                                    | phospholipase D family, member 3                                                                                                                                                                                                                     |
| Smok2b-Mm04179196_s1                                                  | sperm motility kinase 2B                                                                                                                                                                                                                             |
| Sfxn3-Mm00446453_m1                                                   | sideroflexin 3                                                                                                                                                                                                                                       |
| Gm3404;Gm3402;Gm3409;Gm6370;Gm3415;4930449I24Rik-Mm00835341_m1        | predicted gene 3404, predicted gene 3402, predicted gene 3409, predicted gene 6370, predicted gene 3415, RIKEN cDNA 4930449I24 gene                                                                                                                  |
| Rbl2-Mm01242468_m1                                                    | retinoblastoma-like 2                                                                                                                                                                                                                                |
| Lmo2-Mm01281680_m1                                                    | LIM domain only 2                                                                                                                                                                                                                                    |
| Hook3-Mm01212616_m1                                                   | hook homolog 3 (Drosophila)                                                                                                                                                                                                                          |
| Gm13102;Pramel4;Pramel5-Mm04204866_gH                                 | predicted gene 13102, preferentially expressed antigen in melanoma like 4, preferentially expressed antigen in melanoma like 5                                                                                                                       |
| Zfp318-Mm01273666_m1                                                  | zinc finger protein 318                                                                                                                                                                                                                              |
| Ift81-Mm00486960_m1                                                   | intraflagellar transport 81                                                                                                                                                                                                                          |
| Sycp2-Mm00623224_m1                                                   | synaptonemal complex protein 2                                                                                                                                                                                                                       |
| Atoh8-Mm00464055_m1                                                   | atonal homolog 8 (Drosophila)                                                                                                                                                                                                                        |
| Upf3b-Mm01297389_m1                                                   | UPF3 regulator of nonsense transcripts homolog B (yeast)                                                                                                                                                                                             |
| 2310003H01Rik-Mm01243172_m1                                           | RIKEN cDNA 2310003H01 gene                                                                                                                                                                                                                           |
| Olf954-Mm00836704_s1                                                  | olfactory receptor 954                                                                                                                                                                                                                               |

|                             |                                                                                               |
|-----------------------------|-----------------------------------------------------------------------------------------------|
| Hk3-Mm01341942_m1           | hexokinase 3                                                                                  |
| Epdr1-Mm00840848_m1         | ependymin related protein 1 (zebrafish)                                                       |
| Rpsud1-Mm00551153_m1        | RNA pseudouridylate synthase domain containing 1                                              |
| Myh7-Mm01319006_g1          | myosin, heavy polypeptide 7, cardiac muscle, beta                                             |
| Slc43a3-Mm00469627_m1       | solute carrier family 43, member 3                                                            |
| Agpat4-Mm00509777_m1        | 1-acylglycerol-3-phosphate O-acyltransferase 4 (lysophosphatidic acid acyltransferase, delta) |
| Thap7-Mm01344923_m1         | THAP domain containing 7                                                                      |
| Srgap3-Mm00504484_m1        | SLIT-ROBO Rho GTPase activating protein 3                                                     |
| Pus3-Mm00481009_g1          | pseudouridine synthase 3                                                                      |
| Hpd-Mm00801734_m1           | 4-hydroxyphenylpyruvic acid dioxygenase                                                       |
| Ppara-Mm00440939_m1         | peroxisome proliferator activated receptor alpha                                              |
| Heph-Mm00515970_m1          | hephaestin                                                                                    |
| Ubxn10-Mm01545250_m1        | UBX domain protein 10                                                                         |
| Klrc1-Mm00516111_m1         | killer cell lectin-like receptor subfamily C, member 1                                        |
| BC053393-Mm01288934_m1      | cDNA sequence BC053393                                                                        |
| Ank2-Mm00618325_m1          | ankyrin 2, brain                                                                              |
| Zfp2-Mm02528926_s1          | zinc finger protein 2                                                                         |
| Tmem139-Mm00615085_s1       | transmembrane protein 139                                                                     |
| Enkur-Mm04209003_m1         | enkurin, TRPC channel interacting protein                                                     |
| Lima1-Mm00517749_m1         | LIM domain and actin binding 1                                                                |
| Egfl7-Mm00618004_m1         | EGF-like domain 7                                                                             |
| Cacna2d4-Mm01190080_m1      | calcium channel, voltage-dependent, alpha 2/delta subunit 4                                   |
| Aar2-Mm00503287_m1          | AAR2 splicing factor homolog (S. cerevisiae)                                                  |
| 4930529M08Rik-Mm01324644_m1 | RIKEN cDNA 4930529M08 gene                                                                    |
| Prss48-Mm01223180_m1        | protease, serine 48                                                                           |
| Atg2b-Mm00512973_m1         | autophagy related 2B                                                                          |
| Zbtb17-Mm01342020_g1        | zinc finger and BTB domain containing 17                                                      |
| Cdrt4-Mm00481472_m1         | CMT1A duplicated region transcript 4                                                          |
| Prss23-Mm01972869_s1        | protease, serine 23                                                                           |
| Hnrnpul2-Mm01230949_m1      | heterogeneous nuclear ribonucleoprotein U-like 2                                              |
| Cd200r1-Mm00491164_m1       | CD200 receptor 1                                                                              |
| Col26a1-Mm00502829_m1       | collagen, type XXVI, alpha 1                                                                  |
| Gareml-Mm01210799_m1        | GRB2 associated, regulator of MAPK1-like                                                      |
| Pitx1-Mm00440824_m1         | paired-like homeodomain transcription factor 1                                                |
| Slc25a53-Mm01305007_m1      | solute carrier family 25, member 53                                                           |
| D630003M21Rik-Mm00624464_m1 | RIKEN cDNA D630003M21 gene                                                                    |
| Sertm1-Mm01294171_g1        | serine rich and transmembrane domain containing 1                                             |
| Kif9-Mm00495130_m1 FAM      | kinesin family member 9                                                                       |
| Zfp618-Mm01267564_m1        | zinc finger protein 618                                                                       |

|                       |                                                                                 |
|-----------------------|---------------------------------------------------------------------------------|
| Zfp62-Mm02764210_s1   | zinc finger protein 62                                                          |
| Fam180a-Mm00557621_m1 | family with sequence similarity 180, member A                                   |
| Ccl24-Mm00444701_m1   | chemokine (C-C motif) ligand 24                                                 |
| Adora3-Mm01296602_m1  | adenosine A3 receptor                                                           |
| Tceal5-Mm01309619_g1  | transcription elongation factor A (SII)-like 5                                  |
| Chrn4-Mm00804952_m1   | cholinergic receptor, nicotinic, beta polypeptide 4                             |
| Efna1-Mm01212795_m1   | ephrin A1                                                                       |
| Sema6b-Mm00443176_m1  | sema domain, transmembrane domain (TM), and cytoplasmic domain, (semaphorin) 6B |
| Itgb2-Mm00434513_m1   | integrin beta 2                                                                 |
| B4galt2-Mm00479556_m1 | UDP-Gal:betaGlcNAc beta 1,4- galactosyltransferase, polypeptide 2               |
| Chst2-Mm00490018_g1   | carbohydrate sulfotransferase 2                                                 |
| Golph3-Mm00499420_m1  | golgi phosphoprotein 3                                                          |
| Runx1t1-Mm00486771_m1 | runt-related transcription factor 1; translocated to, 1 (cyclin D-related)      |
| Cacnb1-Mm01306805_m1  | calcium channel, voltage-dependent, beta 1 subunit                              |
| Ctnna2-Mm00515399_m1  | catenin (cadherin associated protein), alpha 2                                  |
| Slc9a3-Mm01352473_m1  | solute carrier family 9 (sodium/hydrogen exchanger), member 3                   |
| Galk1-Mm00444182_m1   | galactokinase 1                                                                 |
